# Supplementary material for: Branched montbretin A mimics allow derivatisation and potent amylase inhibition
Source: Royal Society of Chemistry journal article supplement (doi:10.1039/d3ob01051a), 2023-01-01
Supplement: d3ob01051a1.pdf [file d3ob01051a1.pdf]

Branched Montbretin A mimics allow derivatisation and potent amylase inhibition.

Matthew Calvert<sup>1</sup>, Ryan Sweeney<sup>1</sup>, Hong-Ming Chen<sup>1</sup>, Harbir Bajwa<sup>1</sup>, Seyed A. Nasser<sup>1</sup>, Davood Habibi<sup>2</sup> and Stephen G. Withers<sup>1\*</sup>

<sup>1</sup> Department of Chemistry,  
University of British Columbia  
2036 Main Mall  
Vancouver, B.C.,  
Canada V6T 1Z1

<sup>2</sup> Department of Organic Chemistry,  
Faculty of Chemistry,  
Bu-Ali Sina University,  
Hamedan,  
6517838683, Iran.

**General Materials.** All reagents and solvents were purchased from commercial suppliers (Sigma-Aldrich® or Thermo Fisher Scientific®) unless otherwise specified. Dichloromethane was dried by distillation with calcium hydride, tetrahydrofuran was distilled from sodium-benzophenone ketyl. Deionized water was prepared using a Millipore-Direct QTM 5 Ultrapure Water System. Analytical thin layer chromatography (TLC) was performed on Merck pre-coated 0.2 mm aluminum-backed sheets of Silica gel 60F254. TLC plates were visualized with UV light (254 nm) and stained with 1% ferric chloride in 50% water 50% methanol, or with 10% ammonium molybdate in 2 M H<sub>2</sub>SO<sub>4</sub>, followed by heating. Flash chromatography was performed with silica gel (pore size 60 Å, 220-440 mesh particle size) from Sigma-Aldrich. High performance liquid chromatography (HPLC) was performed on an Agilent 1260 Infinity Bio-inert Quaternary LC using an Agilent Eclipse XDB-C18 column (9.4 x 250 mm, 5 µm) at room temperature using acetonitrile and water with a flow rate of 4 mL/min. Elution of material was monitored by UV/Vis at 210, 280, and 350 nm. <sup>1</sup>H NMR, <sup>13</sup>C NMR, HMBC, and HSQC spectra were acquired on a Bruker 300 MHz or 400 MHz spectrometer. Low resolution mass spectra were acquired on a Waters ZQ Mass Detector equipped with an ESCI ion source and Waters 2695 HPLC. High resolution mass spectra were acquired on a Waters/Micromass LCT ESI-TOF. Mass spectra for high molecular weight compounds (>2,000 Da) were acquired on a Bruker Autoflex MALDI-TOF instrument.

Perfluorophenyl (*S*)-2-(((benzyloxy)carbonyl)amino)-3-(4-(benzyloxy)phenyl)propanoate (**3**)

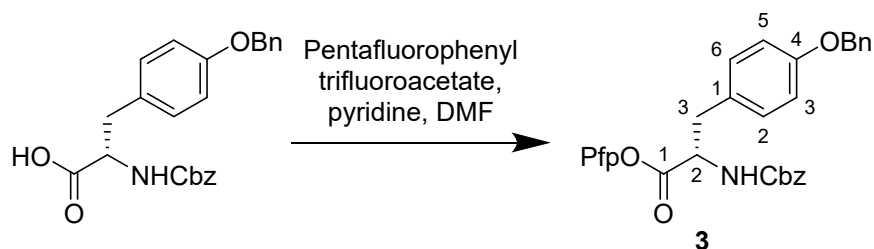

A solution of *N*-Cbz,*O*-Bn-tyrosine (1.013 g, 2.5 mmol) in DMF (5 mL) was treated with pyridine (0.22 mL), followed by pentafluorophenyl trifluoroacetate (0.5 mL, 0.82 g, 2.9 mmol). The reaction mixture was stirred at room temperature for 1 hour and was then diluted with ethyl acetate (100 mL) and washed with 0.1 M HCl and 5% NaHCO<sub>3</sub> (3 x 100 mL each). The organic layer was dried (Na<sub>2</sub>SO<sub>4</sub>), filtered and concentrated *in vacuo* to yield the *title compound* (1.26 g, 2.2 mmol, 88%) as a colourless solid. <sup>1</sup>H NMR (300 MHz, CDCl<sub>3</sub>) δ 7.45-7.32 (m, 10 H, 10 x ArH), 7.12 (d, *J* = 8.6, 2 H, 2 x ArH), 6.93 (d, *J* = 8.6, 2 H, 2 x ArH), 5.19-5.12 (m, 3 H, NH + CH<sub>2</sub>), 5.05 (s, 2 H, CH<sub>2</sub>), 5.01-4.94 (m, 1 H, CH), 3.31-3.16 (m, 2 H, CH<sub>2</sub>). <sup>13</sup>C NMR (75 MHz, CDCl<sub>3</sub>) δ 168.3 (C=O), 158.5 (C=O), 155.7 (C), 137.0 (C), 136.0 (C), 130.5 (2 x CH), 128.74 (2 x CH), 128.70 (2 x CH), 128.5 (CH), 128.3 (2 x CH), 128.2 (CH), 127.6 (2 x CH), 126.8 (C), 115.4 (2 x CH), 70.2 (CH<sub>2</sub>), 67.5 (CH<sub>2</sub>), 54.8 (CH), 37.1 (CH<sub>2</sub>). Pfp carbon signals not observed. HRMS (ESI-TOF): *m/z* calc'd for C<sub>30</sub>H<sub>22</sub>NO<sub>5</sub>F<sub>5</sub>Na: 594.1316 [M+Na]<sup>+</sup>; found: 594.1323.

Benzyl (*S*)-(3-(4-(benzyloxy)phenyl)-1-((2-hydroxyethyl)amino)-1-oxopropan-2-yl)carbamate (**4**)

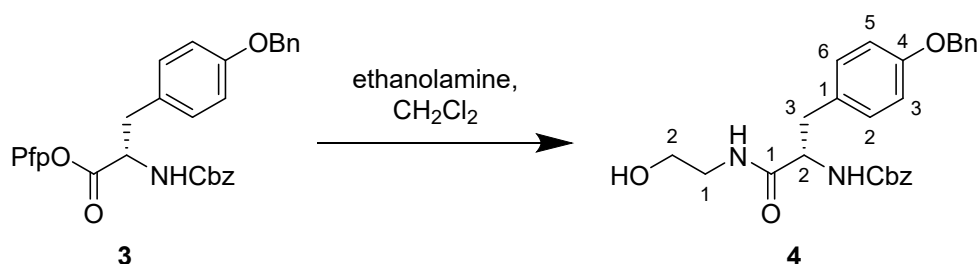

A solution of **3** (960 mg, 1.68 mmol) in CH<sub>2</sub>Cl<sub>2</sub> (10 mL) was treated with ethanolamine (205 mg, 203 μL, 3.36 mmol) dropwise. The reaction mixture was stirred for 1.5 hours and was then diluted with ethyl acetate (100 mL). The solution was then washed with 1 M HCl (2 x 100 mL), 1 M NaOH (2 x 100 mL), water (100 mL) and brine (100 mL). The organic layer was dried (Na<sub>2</sub>SO<sub>4</sub>), filtered, and concentrated *in vacuo* to yield the *title compound* (670 mg, 1.49 mmol, 89%) as a colourless solid. <sup>1</sup>H NMR (300 MHz, CDCl<sub>3</sub>) δ 7.43-7.29 (m, 10 H, 10 x ArH), 7.10 (d, *J* = 8.5, 2 x H, 2 x ArH), 6.89 (d, *J* = 8.5, 2 x H, 2 x ArH), 6.23 (bt, *J* = 5.6, 1 H, NH), 5.45 (bd, *J* = 6.7, 1 H, NH), 5.06 (s, 2 H, CH<sub>2</sub>), 5.02 (s, 2 H, CH<sub>2</sub>), 4.33 (app q, *J* = 7.2, 1 H, CH), 3.60-3.47 (m, 2 H, CH<sub>2</sub>), 3.28 (app q, *J* = 5.2, 2 H, CH<sub>2</sub>), 3.07-2.92 (m, 2 H, CH<sub>2</sub>). In agreement with the literature.<sup>1</sup>

Benzyl (S)-1-((2-((7-(benzyloxy)-2-(3,4-bis(benzyloxy)phenyl)-5-hydroxy-4-oxo-4H-chromen-3-yloxy)ethyl)amino)-3-(4-(benzyloxy)phenyl)-1-oxopropan-2-yl)carbamate (**8**)

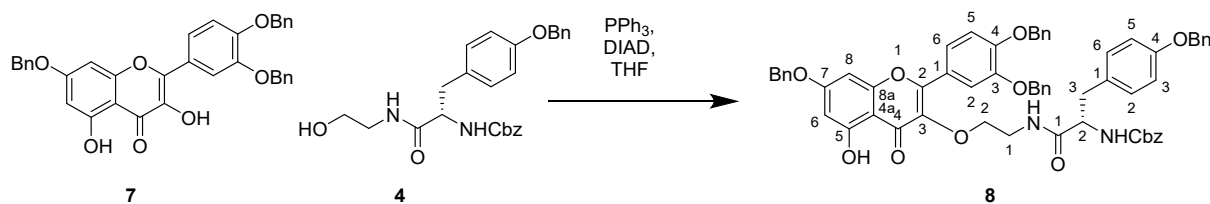

A solution of flavonol **7** (240 mg, 0.42 mmol), alcohol **4** (190 mg, 0.42 mmol) and triphenylphosphine (550 mg, 2.1 mmol) in THF (15 mL) was cooled to 0 °C and treated dropwise with DIAD (0.2 mL, 1.0 mmol). The reaction mixture was stirred at 0 °C for 2.5 hours and was diluted with ethyl acetate and saturated aqueous NaHCO<sub>3</sub> (100 mL each). The aqueous layer was dried (Na<sub>2</sub>SO<sub>4</sub>), filtered, and concentrated *in vacuo*. Purification by flash chromatography on silica gel (10 % - 20 % EtOAc in CH<sub>2</sub>Cl<sub>2</sub>), followed by a subsequent purification on silica gel (2:3 EtOAc:petroleum ether) gave the *title compound* (87mg, 87 μmol, 21%) as a yellow solid. <sup>1</sup>H NMR (300 MHz, CDCl<sub>3</sub>) δ 7.97 (s, 1 H, OH), 7.65 (d, *J* = 1.9, 1 H, ArH), 7.61 (dd, *J* = 8.6, 1.9, 1 H, ArH), 7.51-7.26 (m, 25 H, 25 x ArH), 7.09 (d, *J* = 8.4, 2 H, 2 x ArH), 7.04 (d, *J* = 8.6, 1 H, 1 x ArH), 6.76 (d, *J* = 8.4, 2 H, 2 x ArH), 6.46 (d, *J* = 1.9, 1 H, ArH), 6.43 (d, *J* = 1.9, 1 H, ArH), 5.57 (d, *J* = 8.4, 1 H, NH), 5.27 (s, 2 H, CH<sub>2</sub>), 5.24 (s, 2 H, CH<sub>2</sub>), 5.20-5.08 (m, 4 H, 2 x CH<sub>2</sub>), 4.82 (s, 2 H, CH<sub>2</sub>), 4.52 (app q, *J* = 7.0, 1 H, CH), 3.71-3.58 (m, 2 H, CH<sub>2</sub>), 3.38 (app q, *J* = 16.0, 2 H, CH<sub>2</sub>), 3.15-2.99 (m, 2 H, CH<sub>2</sub>). <sup>13</sup>C NMR (75 MHz, CDCl<sub>3</sub>) δ 178.4 (C=O), 171.2 (C=O), 164.8 (C), 161.9 (C), 157.7 (C=O), 156.8 (C), 156.4 (C), 155.9 (C), 151.8 (C), 148.5 (C), 137.7 (C), 137.1 (C), 136.8 (C), 136.6 (C), 136.5 (C), 135.7 (C), 130.6 (2 x CH), 128.89 (C), 128.86 (2 x CH), 128.77 (2 x CH), 128.75 (2 x CH), 128.53 (4 x CH), 128.49 (2 x CH), 128.2 (CH), 128.13 (CH), 128.08 (CH), 128.03 (CH), 127.9 (CH), 127.5 (2 x CH), 127.32 (2 x CH), 127.30 (2 x CH), 127.2 (2 x CH), 122.84 (C), 122.80 (CH), 115.1 (CH), 114.8 (2 x CH), 113.9 (CH), 105.9 (C), 98.9 (CH), 93.3 (CH), 71.4 (CH<sub>2</sub>), 71.3 (CH<sub>2</sub>), 70.9 (CH<sub>2</sub>), 70.6 (CH<sub>2</sub>), 69.7 (CH<sub>2</sub>), 66.9 (CH<sub>2</sub>), 56.5 (CH), 40.3 (CH<sub>2</sub>), 38.3 (CH<sub>2</sub>). HRMS (ESI-TOF): *m/z* calc'd for C<sub>62</sub>H<sub>54</sub>N<sub>2</sub>O<sub>11</sub>Na: 1025.3625 [M+Na]<sup>+</sup>; found: 1025.3622.

(*S,E*)-3-(3,4-dihydroxyphenyl)-*N*-(1-((2-((2-(3,4-dihydroxyphenyl)-5,7-dihydroxy-4-oxo-4H-chromen-3-yl)oxy)ethyl)amino)-3-(4-hydroxyphenyl)-1-oxopropan-2-yl)acrylamide (**13**)

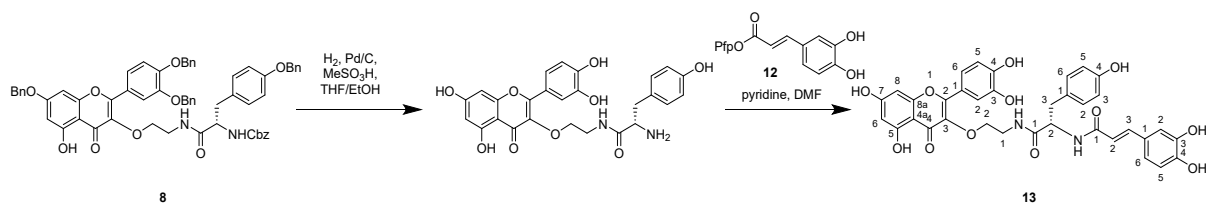

A solution of **8** (40 mg, 40  $\mu$ mol) in EtOH/THF (1:2, 9 mL) was treated with Pd/C (40 mg) and methanesulfonic acid (3  $\mu$ L, 46  $\mu$ mol). The flask was evacuated and placed under hydrogen pressure and stirred 16 h at room temperature. The reaction mixture was filtered through Celite, the filter cake was washed with ethanol (10 mL) and the filtrate treated with triethylamine (10  $\mu$ L, 72  $\mu$ mol). The filtrate was concentrated *in vacuo* and dissolved in DMF (1 mL). The reaction mixture was treated with pyridine (6.5  $\mu$ L, 80  $\mu$ mol), followed by **12** (13.8 mg, 40  $\mu$ mol). After stirring for 16 h, pyridine (6.5  $\mu$ L, 80  $\mu$ mol) was added and the reaction mixture was stirred for a further 5 h, whereupon further **12** was added (6.9 mg, 20  $\mu$ mol). After a total of 40 h stirring, the reaction mixture was quenched with water (100  $\mu$ L) and was concentrated *in vacuo*. Purification by flash chromatography on silica gel (78:10:10:2 to 67:15:15:3, CH<sub>2</sub>Cl<sub>2</sub>:MeOH:Acetone:Water) gave the *title compound* (10.3 mg, 15  $\mu$ mol, 38%) as a yellow solid. <sup>1</sup>H NMR (300 MHz, CD<sub>3</sub>OD)  $\delta$  7.60 (d, *J* = 2.1, 1 H, ArH), 7.49 (dd, *J* = 8.6, 2.1, 1 H, ArH), 7.34 (d, *J* = 15.7, 1 H, CH), 7.07 (d, *J* = 8.5, 2 H, 2 x ArH), 6.98 (d, *J* = 1.8, 1 H, ArH), 6.91 (d, *J* = 8.6, 1 H, ArH), 6.88 (dd, *J* = 8.5, 1.8, 1 H, ArH), 6.73 (d, *J* = 8.5, 1 H, ArH), 6.64 (d, *J* = 8.5, 2 H, 2 x ArH), 6.43 (d, *J* = 15.7, 1 H, CH), 6.36 (d, *J* = 2.0, 1 H, ArH), 6.18 (d, *J* = 2.0, 1 H, ArH), 4.66 (dd, *J* = 8.3, 6.3, 1 H, CH), 4.00-3.79 (m, 2 H, CH<sub>2</sub>), 3.49-3.44 (m, 2 H, CH<sub>2</sub>), 3.13-2.85 (m, 2 H, CH<sub>2</sub>). <sup>13</sup>C NMR (75 MHz, CDCl<sub>3</sub>)  $\delta$  179.7 (C=O), 174.0 (C=O), 169.2 (C=O), 166.0 (C), 163.0 (C), 158.4 (C), 158.2 (C), 157.2 (C), 150.0 (C), 148.8 (C), 146.6 (C), 146.4 (C), 143.0 (CH), 138.3 (C), 131.3 (2 x CH), 129.2 (C), 128.2 (C), 122.8 (C), 122.4 (CH), 122.3 (CH), 117.9 (CH), 116.5 (2 x CH), 116.4 (CH), 116.2 (2 x CH), 115.3 (CH), 105.8 (C), 99.9 (CH), 94.8 (CH), 71.7 (CH<sub>2</sub>), 57.1 (CH), 41.2 (CH<sub>2</sub>), 38.3 (CH<sub>2</sub>). HRMS (ESI-TOF): *m/z* calc'd for C<sub>35</sub>H<sub>30</sub>N<sub>2</sub>O<sub>12</sub>Na: 693.1696 [M+Na]<sup>+</sup>; found: 693.1691.

Benzyl (*S*)-3-(4-(benzyloxy)phenyl)-1-((3-hydroxypropyl)amino)-1-oxopropan-2-yl)carbamate (**6**)

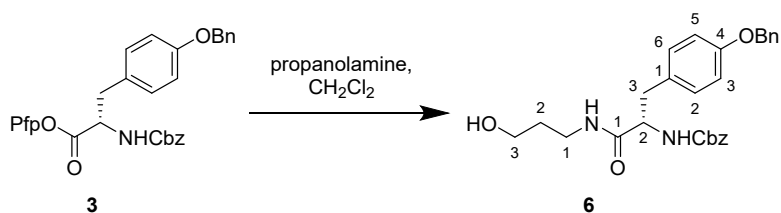

A solution of **3** (850 mg, 1.5 mmol) in  $\text{CH}_2\text{Cl}_2$  (10 mL) was treated with propanolamine (230 mg, 0.23 mL, 3.0 mmol) dropwise. The reaction mixture was stirred for 1.5 hours and was then diluted with ethyl acetate (100 mL). The solution was then washed with 1 M HCl (2 x 100 mL), 1 M NaOH (2 x 100 mL), water (100 mL) and brine (100 mL). The organic layer was dried ( $\text{Na}_2\text{SO}_4$ ), filtered, and concentrated *in vacuo* to yield the *title compound* (620 mg, 1.3 mmol, 90 %) as a colourless solid.  $^1\text{H}$  NMR (300 MHz,  $\text{CDCl}_3$ )  $\delta$  7.44-7.29 (m, 10 H, 10 x ArH), 7.10 (d,  $J = 8.6$ , 2 x H, 2 x ArH), 6.90 (d,  $J = 8.6$ , 2 x H, 2 x ArH), 6.08 (bt,  $J = 5.5$ , 1 H, NH), 5.30 (bs, 1 H, NH), 5.09 (s, 2 H,  $\text{CH}_2$ ), 5.04 (s, 2 H,  $\text{CH}_2$ ), 4.30 (app q,  $J = 7.2$ , 1 H, CH), 3.47 (t,  $J = 5.5$ , 2 H,  $\text{CH}_2$ ), 3.31 (app q,  $J = 6.1$ , 2 H,  $\text{CH}_2$ ), 3.10-2.92 (m, 2 H,  $\text{CH}_2$ ), 2.24 (bs, 1 H, OH), 1.57 (p,  $J = 5.7$ , 2 H,  $\text{CH}_2$ ).  $^{13}\text{C}$  NMR (75 MHz,  $\text{CDCl}_3$ )  $\delta$  171.9 (C=O), 158.0 (C=O), 156.1 (C), 137.0 (C), 136.2 (C), 130.5 (2 x CH), 128.72 (2 x CH), 128.69 (2 x CH), 128.4 (CH), 128.2 (2 x CH), 128.1 (CH), 127.6 (2 x CH), 115.2 (2 x CH), 70.1 ( $\text{CH}_2$ ), 67.2 ( $\text{CH}_2$ ), 59.7 ( $\text{CH}_2$ ), 56.8 (CH), 37.8 ( $\text{CH}_2$ ), 36.7 ( $\text{CH}_2$ ), 31.8 ( $\text{CH}_2$ ). 1 x C obscured. HRMS (ESI-TOF):  $m/z$  calc'd for  $\text{C}_{27}\text{H}_{30}\text{N}_2\text{O}_5\text{Na}$ : 485.2047 [ $\text{M}+\text{Na}$ ] $^+$ ; found: 485.2054.

Benzyl (*S*)-1-((3-((7-(benzyloxy)-2-(3,4-bis(benzyloxy)phenyl)-5-hydroxy-4-oxo-4H-chromen-3-yl)oxy)propyl)amino)-3-(4-(benzyloxy)phenyl)-1-oxopropan-2-yl)carbamate (**9**)

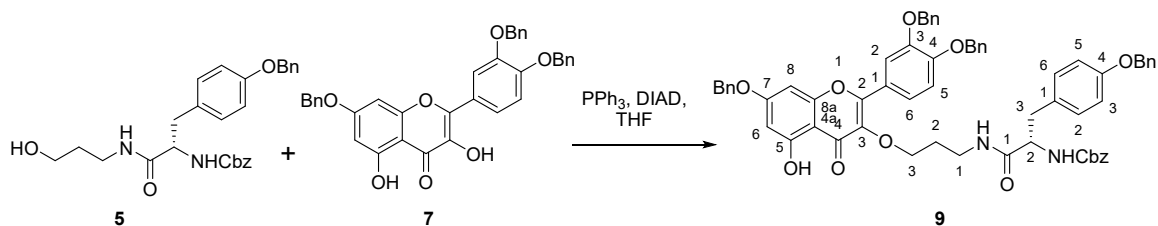

A solution of **7** (309 mg, 0.54 mmol), **5** (250 mg, 0.54 mmol) and triphenylphosphine (283 mg, 1.1 mmol) in THF (25 mL) was cooled to 0 °C and treated dropwise with DIAD (0.21 mL, 1.1 mmol). The reaction mixture was stirred at 0 °C for 2.5 hours and was diluted with ethyl acetate and saturated aqueous NaHCO<sub>3</sub> (100 mL each). The aqueous layer was dried (Na<sub>2</sub>SO<sub>4</sub>), filtered, and concentrated *in vacuo*. Purification by flash chromatography on silica gel (2% MeOH in CH<sub>2</sub>Cl<sub>2</sub>) gave the *title compound* (188 mg, 0.16 mmol, 30 %) as a yellow solid. <sup>1</sup>H NMR (300 MHz, CDCl<sub>3</sub>) δ 7.82 (bs, 1H, NH), 7.68 (s, 1H, ArH), 7.62 (d, *J* = 8.7, 1H, ArH), 7.50-7.17 (m, 24H), 7.11 (d, *J* = 8.6, 2H, 2 x ArH), 7.01 (d, *J* = 8.6, 2H, 2 x ArH), 6.76 (d, *J* = 8.3, 2H, 2 x H), 6.46 (bs, 2H, 2 x ArH), 5.61 (d, *J* = 8.3, 1H, NH), 5.26 (s, 2 H, CH<sub>2</sub>), 5.21 (s, 2 H, CH<sub>2</sub>), 5.13 (s, 2 H, CH<sub>2</sub>), 5.12-5.02 (m, 2H, CH<sub>2</sub>), 4.82 (s, 2 H, CH<sub>2</sub>), 4.53 (app q, *J* = 7.1, 1 H, CH), 3.59-3.32 (m, 4H, 2 x CH<sub>2</sub>), 3.16-2.96 (m, 2 H, CH<sub>2</sub>), 1.64 (bs, 2 H, CH<sub>2</sub>). <sup>13</sup>C NMR (75 MHz, CDCl<sub>3</sub>) δ 178.7 (C=O), 171.0 (C=O), 164.8 (C), 161.9 (C), 157.7 (C=O), 156.7 (C), 156.3 (C), 155.8 (C), 151.7 (C), 148.5 (C), 137.7 (C), 137.1 (C), 136.9 (C), 136.5 (C), 135.7 (C), 130.6 (2 x CH), 129.04 (C), 128.85 (2 x CH), 128.73 (2 x CH), 128.70 (2 x CH), 128.5 (4 x CH), 128.4 (2 x CH), 128.2 (CH), 128.1 (CH), 128.04 (CH), 127.98 (CH), 127.9 (CH), 127.5 (2 x CH), 127.34 (2 x CH), 127.26 (4 x CH), 123.0 (C), 122.7 (CH), 114.9 (CH), 114.8 (2 x CH), 113.8 (CH), 106.0 (C), 98.9 (CH), 93.2 (CH), 71.6 (CH<sub>2</sub>), 70.9 (CH<sub>2</sub>), 70.6 (CH<sub>2</sub>), 69.8 (CH<sub>2</sub>), 69.1 (CH<sub>2</sub>), 66.8 (CH<sub>2</sub>), 56.6 (CH), 38.4 (CH<sub>2</sub>), 35.7 (CH<sub>2</sub>), 28.5 (CH<sub>2</sub>). HRMS (ESI-TOF): *m/z* calc'd for C<sub>63</sub>H<sub>57</sub>N<sub>2</sub>O<sub>11</sub>: 1017.3957 [M+H]<sup>+</sup>; found: 1017.3963.

(*S,E*)-3-(3,4-dihydroxyphenyl)-*N*-(1-((3-((2-(3,4-dihydroxyphenyl)-5,7-dihydroxy-4-oxo-4*H*-chromen-3-yl)oxy)propyl)amino)-3-(4-hydroxyphenyl)-1-oxopropan-2-yl)acrylamide (**1**)

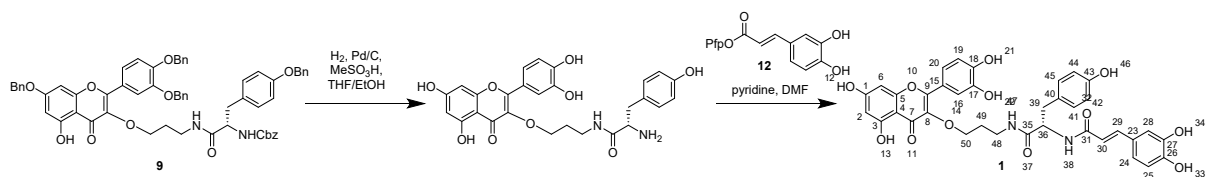

A solution of **9** (46 mg, 0.045 mmol) in EtOH/THF (1:2, 9 mL) was treated with Pd/C (40 mg) and methanesulfonic acid (3  $\mu$ L, 46  $\mu$ mol). The flask was evacuated and placed under hydrogen pressure and stirred 16 h at room temperature. The reaction mixture was filtered through Celite, the filter cake was washed with ethanol (10 mL) and the filtrate treated with triethylamine (10  $\mu$ L, 72  $\mu$ mol). The filtrate was concentrated *in vacuo* and dissolved in DMF (1 mL). The reaction mixture was treated with pyridine (6.5  $\mu$ L, 80  $\mu$ mol), followed by **12** (13.8 mg, 40  $\mu$ mol). After stirring for 16 h, pyridine (6.5  $\mu$ L, 80  $\mu$ mol) was added and the reaction mixture was stirred for a further 5 h, whereupon further **12** was added (6.9 mg, 20  $\mu$ mol). After a total of 40 h stirring, the reaction mixture was quenched with water (100  $\mu$ L) and was concentrated *in vacuo*. Purification by flash chromatography on silica gel (78:10:10:2 to 67:15:15:3, DCM:MeOH:Acetone:Water) gave the *title compound* (11 mg, 0.016 mmol, 36 %) as a yellow solid. Analytical data as reported previously.<sup>2</sup>



Benzyl (*S*)-3-(4-(benzyloxy)phenyl)-1-((4-hydroxybutyl)amino)-1-oxopropan-2-yl)carbamate (**6**)

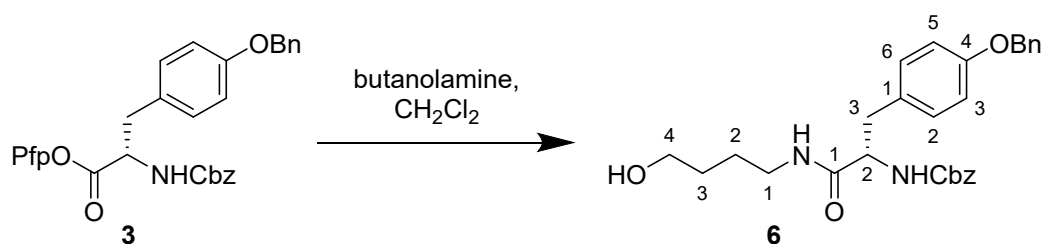

A solution of **3** (600 mg, 1.05 mmol) in dichloromethane (10 mL) was treated with butanolamine (187 mg, 0.19 mL, 2.1 mmol) dropwise. The reaction mixture was stirred for 1.5 hours and was then diluted with ethyl acetate (100 mL). The solution was then washed with 1 M HCl (2 x 100 mL), 1 M NaOH (2 x 100 mL), water (100 mL) and brine (100 mL). The organic layer was dried (Na<sub>2</sub>SO<sub>4</sub>), filtered, and concentrated in vacuo to yield the *title compound* (480 mg, 1.01 mmol, 96 %) as a colourless solid. <sup>1</sup>H NMR (300 MHz, CDCl<sub>3</sub>) δ 7.44-7.29 (m, 10 H, 10 x ArH), 7.10 (d, *J* = 8.5, 2 x H, 2 x ArH), 6.89 (d, *J* = 8.5, 2 x H, 2 x ArH), 6.11 (bt, *J* = 5.3, 1 H, NH), 5.45 (bd, *J* = 6.5, 1 H, NH), 5.07 (s, 2 H, CH<sub>2</sub>), 5.02 (s, 2 H, CH<sub>2</sub>), 4.29 (app q, *J* = 7.2, 1 H, CH), 3.54 (t, *J* = 5.5, 2 H, CH<sub>2</sub>), 3.18 (app q, *J* = 6.1, 2 H, CH<sub>2</sub>), 3.07-2.91 (m, 2 H, CH<sub>2</sub>), 1.89 (bs, 1 H, OH), 1.49-1.38 (m, 4 H, 2 x CH<sub>2</sub>). <sup>13</sup>C NMR (75 MHz, CDCl<sub>3</sub>) δ 171.0 (C=O), 158.0 (C=O), 156.0 (C), 137.0 (C), 136.3 (C), 130.5 (2 x CH), 128.9 (C), 128.73 (2 x CH), 128.69 (2 x CH), 128.4 (CH), 128.2 (2 x CH), 128.1 (CH), 127.6 (2 x CH), 115.2 (2 x CH), 70.2 (CH<sub>2</sub>), 67.2 (CH<sub>2</sub>), 62.4 (CH<sub>2</sub>), 56.8 (CH), 39.4 (CH<sub>2</sub>), 38.0 (CH<sub>2</sub>), 29.7 (CH<sub>2</sub>), 26.0 (CH<sub>2</sub>). HRMS (ESI-TOF): *m/z* calc'd for C<sub>28</sub>H<sub>32</sub>N<sub>2</sub>O<sub>5</sub>: 477.2384 [M+H]<sup>+</sup>; found: 477.2387.

Benzyl (S)-1-((4-((7-(benzyloxy)-2-(3,4-bis(benzyloxy)phenyl)-5-hydroxy-4-oxo-4H-chromen-3-yl)oxy)butyl)amino)-3-(4-(benzyloxy)phenyl)-1-oxopropan-2-yl)carbamate (**10**)

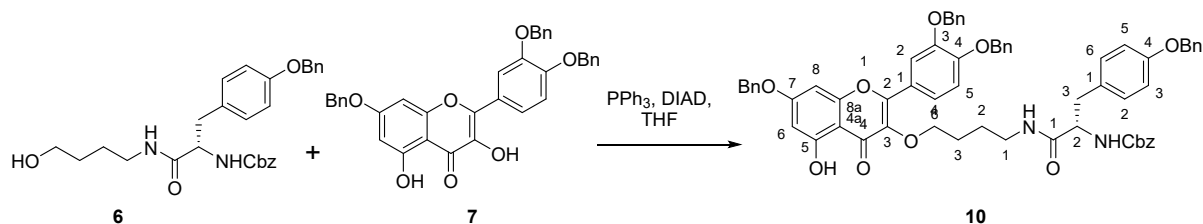

A solution of **6** (250 mg, 0.525 mmol), **7** (300 mg, 0.525 mmol) and triphenylphosphine (206.56 mg, 0.7875 mmol) in THF (25 mL) was cooled to 0 °C and treated dropwise with DIAD (0.123 mL, 0.7875 mmol). The reaction mixture was stirred at 0 °C for 2.5 hours and was diluted with ethyl acetate and saturated aqueous NaHCO<sub>3</sub> (100 mL each). The aqueous layer was dried (Na<sub>2</sub>SO<sub>4</sub>), filtered, and concentrated *in vacuo*. Purification by flash chromatography on silica gel (2% MeOH in CH<sub>2</sub>Cl<sub>2</sub>) gave the *title compound* (150 mg, 0.145 mmol, 28 %) as a yellow solid. <sup>1</sup>H NMR (300 MHz, CDCl<sub>3</sub>) δ 7.67-7.61 (m, 2 H, 2 x ArH), 7.48-7.25 (m, 25 H, 25 x ArH), 7.07-7.00 (m, 3 H, 3 x ArH), 6.78 (d, *J* = 8.1, 2 H, 2 x ArH), 6.45 (bs, 3 H, 2 x ArH, 1 x NH), 5.50 (d, *J* = 6.9, 1 H, NH), 5.24 (s, 2 H, CH<sub>2</sub>), 5.21 (s, 2 H, CH<sub>2</sub>), 5.13 (s, 2 H, CH<sub>2</sub>), 5.06 (s, 2 H, CH<sub>2</sub>), 4.90 (s, 2 H, CH<sub>2</sub>), 4.41 (app q, *J* = 7.0, 1 H, CH), 3.83-3.68 (m, 2 H, CH<sub>2</sub>), 3.22 (bs, 2 H, CH<sub>2</sub>), 3.06-2.91 (m, 2 H, CH<sub>2</sub>). 1.54 (bs, 4 H, 2 x CH<sub>2</sub>). <sup>13</sup>C NMR (75 MHz, CDCl<sub>3</sub>) δ 178.9 (C=O), 171.0 (C=O), 164.7 (C), 162.1 (C), 157.8 (C=O), 156.8 (C), 156.2 (C), 151.6 (C), 148.4 (C), 138.3 (C), 137.04 (C), 136.99 (C), 136.6 (C), 136.4 (C), 135.9 (C), 130.5 (2 x CH), 128.9 (2 x CH), 128.77 (2 x CH), 128.74 (2 x CH), 128.6 (4 x CH), 128.5 (C), 128.2 (CH), 128.1 (3 x CH), 128.0 (CH), 127.6 (2 x CH), 127.5 (2 x CH), 127.4 (2 x CH), 127.3 (2 x CH), 123.3 (C), 123.0 (CH), 115.4 (CH), 114.9 (2 x CH), 113.8 (CH), 106.2 (C), 98.8 (CH), 93.2 (CH), 72.6 (CH<sub>2</sub>), 71.7 (CH<sub>2</sub>), 71.0 (CH<sub>2</sub>), 70.6 (CH<sub>2</sub>), 69.9 (CH<sub>2</sub>), 67.0 (CH<sub>2</sub>), 56.5 (CH), 39.3 (CH<sub>2</sub>), 38.4 (CH<sub>2</sub>), 27.9 (CH<sub>2</sub>), 25.8 (CH<sub>2</sub>). 1 x C not observed. HRMS (ESI-TOF): *m/z* calc'd for C<sub>64</sub>H<sub>58</sub>N<sub>2</sub>O<sub>11</sub>Na: 1053.3938 [M+Na]<sup>+</sup>; found: 1053.3925.

(*S,E*)-3-(3,4-dihydroxyphenyl)-*N*-(1-((4-((2-(3,4-dihydroxyphenyl)-5,7-dihydroxy-4-oxo-4*H*-chromen-3-yl)oxy)butyl)amino)-3-(4-hydroxyphenyl)-1-oxopropan-2-yl)acrylamide (**14**)

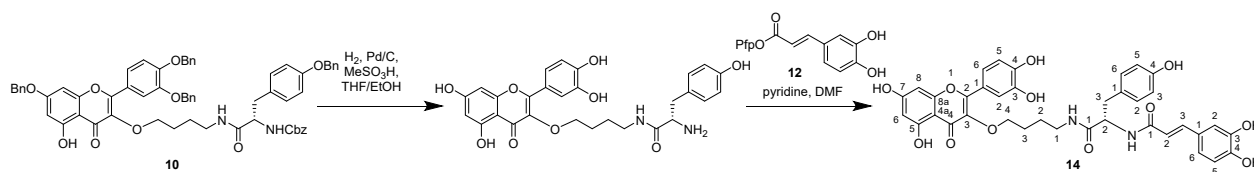

A solution of **10** (40 mg, 40  $\mu$ mol) in EtOH/THF (1:2, 9 mL) was treated with Pd/C (40 mg) and methanesulfonic acid (3  $\mu$ L, 46  $\mu$ mol). The flask was evacuated and placed under hydrogen pressure and stirred 16 h at room temperature. The reaction mixture was filtered through Celite, the filter cake was washed with ethanol (10 mL) and the filtrate treated with triethylamine (10  $\mu$ L, 72  $\mu$ mol). The filtrate was concentrated *in vacuo* and dissolved in DMF (1 mL). The reaction mixture was treated with pyridine (6.5  $\mu$ L, 80  $\mu$ mol), followed by **12** (13.8 mg, 40  $\mu$ mol). After stirring for 16 h, pyridine (6.5  $\mu$ L, 80  $\mu$ mol) was added and the reaction mixture was stirred for a further 5 h, whereupon further caffeate-Pfp ester was added (6.9 mg, 20  $\mu$ mol). After a total of 40 h stirring, the reaction mixture was quenched with water (100  $\mu$ L) and was concentrated *in vacuo*. Purification by flash chromatography on silica gel (78:10:10:2 to 67:15:15:3, CH<sub>2</sub>Cl<sub>2</sub>:MeOH:Acetone:Water) gave the *title compound* (11 mg, 16  $\mu$ mol, 42%) as a yellow solid. <sup>1</sup>H NMR (300 MHz, CD<sub>3</sub>OD)  $\delta$  7.57 (d, *J* = 2.0, 1 H, ArH), 7.47 (dd, *J* = 8.5, 2.1, 1 H, ArH), 7.34 (d, *J* = 15.6, 1 H, CH), 7.05 (d, *J* = 8.5, 2 H, 2 x ArH), 6.97 (d, *J* = 1.7, 1 H, ArH), 6.91-6.85 (m, 2 H, 2 x ArH), 6.73 (d, *J* = 8.1, 1 H, ArH), 6.67 (d, *J* = 8.5, 2 H, 2 x ArH), 6.42-6.36 (m, 2 H, 2 x ArH), 6.19 (d, *J* = 2.0, 1 H, ArH), 4.61 (t, *J* = 7.4, 1 H, CH), 3.85 (t, *J* = 5.4, 2 H, CH<sub>2</sub>), 3.25-3.06 (m, 2 H, CH<sub>2</sub>), 3.04-2.83 (m, 2 H, CH<sub>2</sub>), 1.66-1.51 (m, 4 H, 2 x CH<sub>2</sub>). <sup>13</sup>C NMR (75 MHz, CDCl<sub>3</sub>)  $\delta$  180.1 (C=O), 173.7 (C=O), 168.9 (C=O), 165.8 (C), 163.1 (C), 158.4 (C), 158.3 (C), 157.2 (C), 149.8 (C), 148.8 (C), 146.7 (C), 146.3 (C), 142.9 (CH), 138.6 (C), 131.3 (2 x CH), 129.0 (C), 128.2 (C), 123.1 (C), 122.5 (CH), 122.2 (CH), 117.9 (CH), 116.7 (CH), 116.4 (CH), 116.3 (CH), 116.2 (2 x CH), 115.1 (CH), 105.9 (C), 99.7 (CH), 94.7 (CH), 73.4 (CH<sub>2</sub>), 56.8 (CH), 40.0 (CH<sub>2</sub>), 38.6 (CH<sub>2</sub>), 28.8 (CH<sub>2</sub>), 26.7 (CH<sub>2</sub>). HRMS (ESI-TOF): *m/z* calc'd for C<sub>37</sub>H<sub>35</sub>N<sub>2</sub>O<sub>12</sub>: 699.2190 [M+H]<sup>+</sup>; found: 699.2191.

Benzyl (2*S*,3*S*)-3-(4-(benzyloxy)phenyl)-2-(quinolin-8-ylcarbamoyl)pyrrolidine-1-carboxylate (**19**)

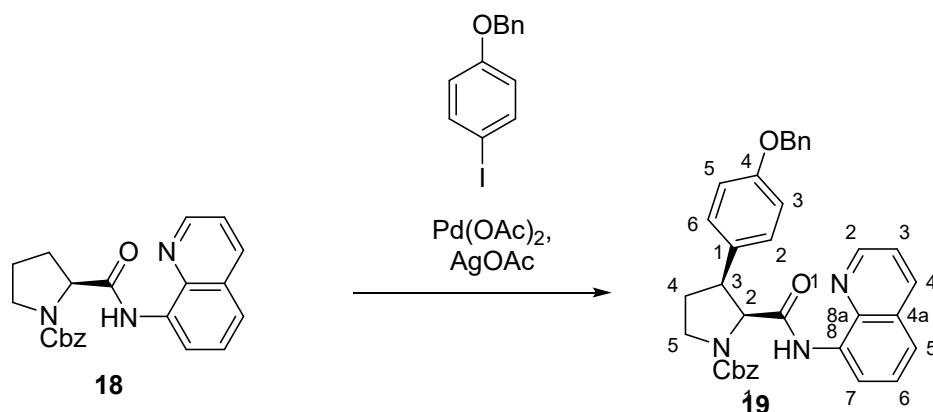

A reaction vessel was charged with proline **18** (375 mg, 1.0 mmol), AgOAc (300 mg, 1.8 mmol), 4-benzyloxyphenyl iodide (558 mg, 1.8 mmol) and Pd(OAc)<sub>2</sub> (11 mg, 0.05 mmol). The reaction vessel was evacuated and back-filled with argon, then was sealed and stirred at 110 °C for 22 hours. The reaction mixture was cooled to room temperature, diluted with ethyl acetate (10 mL), filtered through celite, and further washed with ethyl acetate (2 x 10 mL). The filtrate was concentrated *in vacuo*, and the crude residue was purified by flash chromatography on silica gel (18% EtOAc in toluene) to give the *title compound* (329 mg, 0.59 mmol, 59 %) as a colourless solid. <sup>1</sup>H NMR (300 MHz, CDCl<sub>3</sub>) δ 9.56 (s, 1H, NH), 8.63 (d, *J* = 4.5, 1 H), 8.61-8.55 (m, 1 H), 8.02 (dd, *J* = 15.2, 8.3, 1 H), 7.45-7.18 (m, 13 H), 7.02-6.90 (m, 2 H), 6.72-6.67 (m, 2 H), 5.30-5.09 (m, 2 H, CH<sub>2</sub>), 4.79-4.57 (m, 3 H, CH<sub>2</sub> + CH), 4.19-4.06 (1 H, CH of CH<sub>2</sub>), 3.78-3.60 (m, 2 H, CH + CH of CH<sub>2</sub>), 2.86-2.67 (m, 1 H, CH of CH<sub>2</sub>), 2.22-2.14 (p, *J* = 6.1, 1 H, CH of CH<sub>2</sub>). <sup>13</sup>C NMR (75 MHz, CDCl<sub>3</sub>) δ 168.7 (C=O), 157.9 (C), 154.9 + 154.4 (C=O), 147.9 (CH), 138.1 (C), 136.7 (C), 136.3 (C), 135.9 (CH), 133.7 (C), 128.9 (2 x CH), 128.7 (CH), 128.3 (2 x CH), 127.9 (CH), 127.7 (2 x CH), 127.5 (2 x CH), 127.2 (2 x CH), 127.0 (CH), 121.4 (CH), 121.3 (CH), 116.2 (CH), 114.7 (2 x CH), 69.6 (CH<sub>2</sub>), 67.0 (CH<sub>2</sub>), 66.5 + 66.3 (CH), 48.0 + 47.1 (CH), 46.6 + 46.2 (CH<sub>2</sub>), 28.6 + 27.9 (CH<sub>2</sub>). 2 x C not observed. HRMS (ESI-TOF): *m/z* calc'd for C<sub>35</sub>H<sub>32</sub>N<sub>3</sub>O<sub>4</sub>: 558.2393 [M+H]<sup>+</sup>; found: 558.2398.

Benzyl (2*S*,3*S*)-3-(4-(benzyloxy)phenyl)-2-((tert-butoxycarbonyl)(quinolin-8-yl)carbamoyl)pyrrolidine-1-carboxylate (**20**)

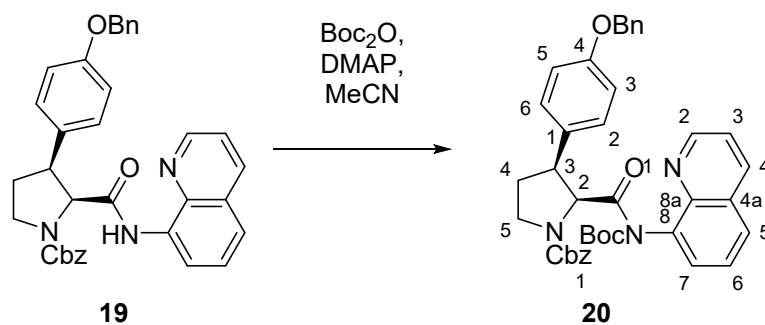

A reaction vessel was charged with proline **19** (112 mg, 0.2 mmol),  $\text{Boc}_2\text{O}$  (436 mg, 2.0 mmol) and DMAP (50 mg, 0.4 mmol), and acetonitrile (0.4 mL) was added. The reaction vessel was evacuated briefly and backfilled with argon, and was then sealed and stirred at 55 °C. Further addition of  $\text{Boc}_2\text{O}$  (3 x 200 mg) was carried out after 1.5, 22, and 26 hours, and the temperature was increased to 70 °C after 22 hours. After 44 hours the reaction mixture was cooled to rt, diluted with sat aq ammonium chloride (2 mL) and  $\text{CH}_2\text{Cl}_2$  (2 mL). The layers were separated and the aqueous was further extracted with  $\text{CH}_2\text{Cl}_2$  (3 x 10 mL). The combined organics were dried ( $\text{Na}_2\text{SO}_4$ ), filtered, and concentrated *in vacuo*. The residue was purified by flash chromatography on silica gel (20% ethyl acetate in toluene) to yield the *title compound* mixed with starting material **19**, which was used in the next step without further purification. HRMS (ESI-TOF):  $m/z$  calc'd for  $\text{C}_{40}\text{H}_{40}\text{N}_3\text{O}_6$ : 658.2917  $[\text{M}+\text{H}]^+$ ; found: 658.2915.

(2*S*,3*S*)-1-((benzyloxy)carbonyl)-3-(4-(benzyloxy)phenyl)pyrrolidine-2-carboxylic acid (**21**)

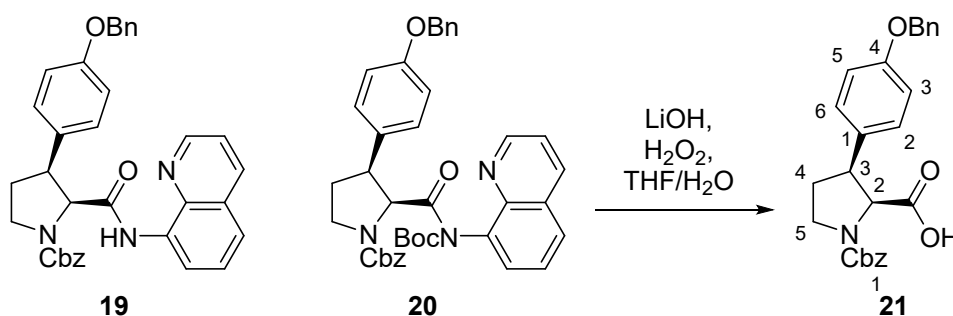

A solution of  $\text{H}_2\text{O}_2$  (306  $\mu\text{L}$ , 3.0 mmol, 30% in water) in THF (3 mL) was added to a solution of  $\text{LiOH}\cdot\text{H}_2\text{O}$  (84 mg, 2.0 mmol) in  $\text{H}_2\text{O}$  (3 mL) at 0 °C under argon. This solution was then added to the mixture of **19** and **20** in THF (4 mL) at 0 °C under argon. The resultant solution was stirred at room temperature for 44 hours, whereupon sodium thiosulfate (10 mL) and ethyl acetate (10 mL) were added, and the solution was acidified to pH = 2 with 1 M HCl. The layers were separated and the aqueous was further extracted with ethyl acetate (3 x 10 mL), and the pooled organics dried ( $\text{Na}_2\text{SO}_4$ ), filtered and concentrated *in vacuo*. The crude product was purified by flash chromatography on silica gel (E = 5% methanol in dichloromethane) to yield the *title compound* (25.8 mg, 60  $\mu\text{mol}$ , 30% over two steps).  $^1\text{H}$  NMR (400 MHz,  $\text{CDCl}_3$ )  $\delta$  7.40-7.23 (m, 10H), 7.13 (dd,  $J = 8.3, 5.4$  2 H), 6.89 (d,  $J = 8.4$ , 2 H), 5.14, 5.08 (ABq, 2H,  $J_{\text{AB}} = 12.6$ ), 4.98 (s, 2H), 4.52 (app dd,  $J = 8.7, 4.9$ ), 3.87 (app t,  $J = 9.5$ ), 3.68-3.57 (m, 1H), 3.54-3.46 (m, 1H), 2.59-2.43 (m, 1H), 2.14-2.06 (m, 1H)  $^{13}\text{C}$  NMR (100 MHz,  $\text{CDCl}_3$ )  $\delta$  175.6 + 175.2 (C=O), 158.34 + 158.30 (C), 155.1 + 154.4 (C=O), 137.1 + 137.0 (C), 136.6 + 136.4 (C), 129.1 + 129.0 (2 x CH), 128.7 (2 x CH), 128.6 + 128.5 (2 x CH), 128.5 + 128.3 (C), 128.2 + 128.0 (3 x CH), 127.7 (CH), 127.6 (2 x CH), 114.9 (2 x CH), 70.1 ( $\text{CH}_2$ ), 67.4 + 67.3 ( $\text{CH}_2$ ), 64.1 + 63.8 (CH), 47.5 + 46.5 (CH), 46.4 + 46.1 ( $\text{CH}_2$ ), 28.7 + 27.7 ( $\text{CH}_2$ ). HRMS (ESI-TOF):  $m/z$  calc'd for  $\text{C}_{26}\text{H}_{25}\text{NO}_5\text{Na}$ : 454.1625  $[\text{M}+\text{Na}]^+$ ; found: 454.1629.

Benzyl (2*S*,3*S*)-2-((3-((7-(benzyloxy)-2-(3,4-bis(benzyloxy)phenyl)-5-hydroxy-4-oxo-4*H*-chromen-3-yl)oxy)propyl)carbamoyl)-3-(4-(benzyloxy)phenyl)pyrrolidine-1-carboxylate (**23**)

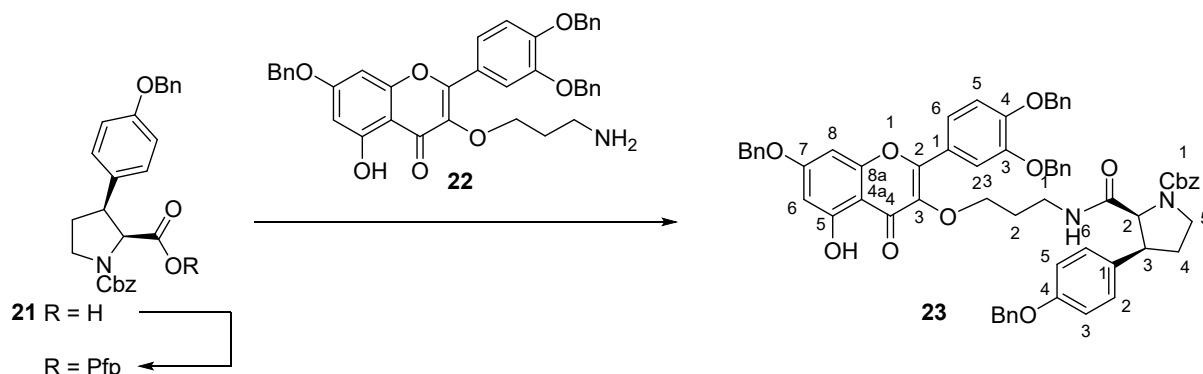

A solution of **21** (25.8 mg, 60  $\mu$ mol) in DMF (0.2 mL) was treated with pyridine (5.3  $\mu$ L, 66  $\mu$ mol) and pentafluorophenyl trifluoroacetate (12  $\mu$ L, 70  $\mu$ mol). The reaction mixture was stirred at room temperature for 90 minutes, diluted with ethyl acetate (20 mL) and washed with 0.1 M HCl and 5% NaHCO<sub>3</sub> (3 x 20 mL each) and brine (20 mL). The organic layer was dried (Na<sub>2</sub>SO<sub>4</sub>), filtered, and concentrated *in vacuo*. The crude Pfp ester was then taken up in CH<sub>2</sub>Cl<sub>2</sub> (1 mL) and was added to a solution of **22** (42 mg, 66  $\mu$ mol) and pyridine (10  $\mu$ L, 120  $\mu$ mol) in CH<sub>2</sub>Cl<sub>2</sub> (1 mL). The reaction mixture was stirred at room temperature for three days, with further additions of amine (42 mg, t = 24h) and triethylamine (8.4  $\mu$ L, 60  $\mu$ mol, t = 43h and t = 66h). The reaction mixture was diluted with CH<sub>2</sub>Cl<sub>2</sub> (10 mL) and was washed with 1 M HCl (3 x 5 mL) and brine (5 mL). The organic layer was dried (Na<sub>2</sub>SO<sub>4</sub>), filtered, and concentrated *in vacuo*. The crude residue was purified by flash chromatography on silica gel (20% to 40% ethyl acetate in toluene) to yield the *title compound* (36.4 mg, 35  $\mu$ mol, 58% over two steps) as a pale yellow solid. <sup>1</sup>H NMR (400 MHz, CDCl<sub>3</sub>)  $\delta$  12.51 (s) + 12.38 (s, 1 H), 7.68 (d, *J* = 3.1, 1H), 7.62 (d, *J* = 8.3, 1H), 7.49-7.17 (m, 27H), 7.00 (d, *J* = 8.7, 1H), 6.73 (app dd, *J* = 16.4, 8.3, 2H), 6.53-6.48 (m, 2H), 5.25-5.03 (m, 8H), 4.85-4.79 (m, 2H), 4.48 (app dd, *J* = 12.1, 8.5, 1H), 3.97 (app q, *J* = 9.0), 3.65-3.13 (m, 5H), 2.98-2.89 (m, 1H), 2.73 (app sept, *J* = 11.0, 1H), 2.08 (bs, 1H), 1.52-1.22 (m, 2H) <sup>13</sup>C NMR (100 MHz, CDCl<sub>3</sub>)  $\delta$  178.8 (C=O), 170.0 (C=O), 164.9 + 164.8 (C), 161.99 + 161.95 (C), 158.0 (C=O), 156.8 (C), 156.3 (C), 154.9 + 154.6 (C), 151.73 + 151.65 (C), 148.6 (C), 137.8 + 137.7 (C), 137.0 (C), 136.9 (C), 136.61 + 136.56 (C), 135.8 (C), 129.7 (2 x CH), 129.5 (CH), 128.9 (2 x CH), 128.8 (2 x CH), 128.7 (2 x CH), 128.54 (2 x CH), 128.48 (CH), 128.3 (CH), 128.2 (CH), 128.1 (CH), 128.0 (2 x CH), 127.64 (CH), 127.59 (2 x CH), 127.4 (2 x CH), 127.29 (2 x CH), 127.26 (2 x CH), 123.1 (C), 122.7 (CH), 115.0 (CH), 114.5 (2 x CH), 113.9 (CH), 106.1 (C), 99.0 (CH), 93.3 (CH), 71.63 + 71.59 (CH<sub>2</sub>), 71.0 (CH<sub>2</sub>), 70.6 (CH<sub>2</sub>), 69.9 (CH<sub>2</sub>), 68.4 + 68.3 (CH<sub>2</sub>), 67.0 + 66.9 (CH<sub>2</sub>), 65.7 + 65.4 (CH), 47.9 + 47.1 (CH), 46.7 + 46.3 (CH<sub>2</sub>), 34.8 + 34.6 (CH<sub>2</sub>), 29.0 + 28.4 + 28.1 (2 x CH<sub>2</sub>). HRMS (ESI-TOF): *m/z* calc'd for C<sub>65</sub>H<sub>59</sub>N<sub>2</sub>O<sub>11</sub>: 1043.4113 [M+H]<sup>+</sup>; found: 1043.4128.

(2*S*,3*S*)-*N*-(3-((2-(3,4-Dihydroxyphenyl)-5,7-dihydroxy-4-oxo-4*H*-chromen-3-yl)oxy)propyl)-1-((*E*)-3-(3,4-dihydroxyphenyl)acryloyl)-3-(4-hydroxyphenyl)pyrrolidine-2-carboxamide (**17**)

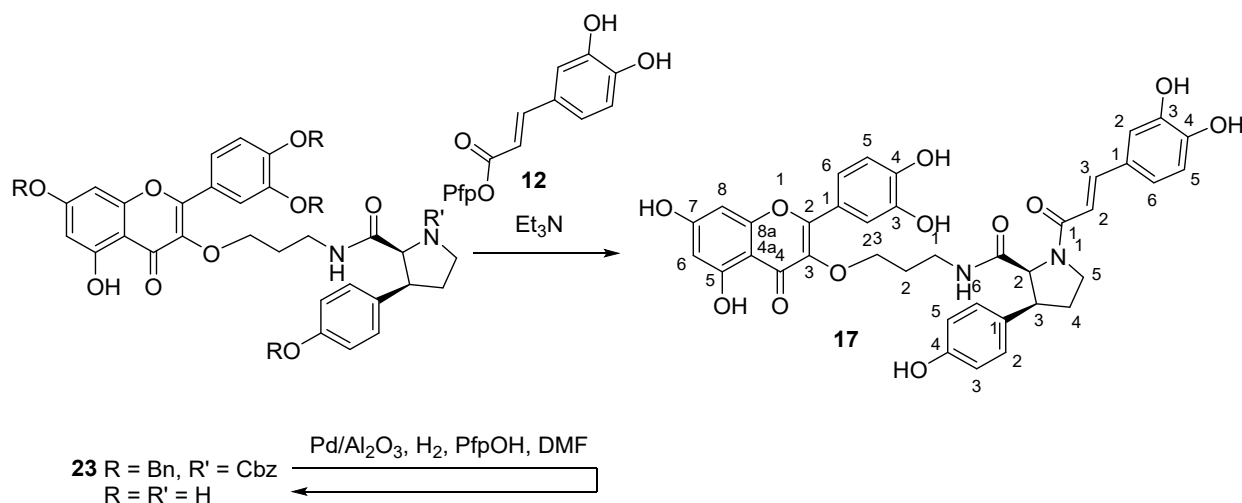

A solution of **23** (36 mg, 35  $\mu$ mol) in DMF (1 mL) was treated with a solution of PfpOH (32 mg, 0.17 mmol) in DMF (1 mL) and Pd/Al<sub>2</sub>O<sub>3</sub> (10 mg), placed under hydrogen pressure and stirred for 18 hours at room temperature. The reaction mixture was filtered through celite and the filter cake washed with DMF (0.5 mL). The filtrate was cooled to 0 °C and was treated with Et<sub>3</sub>N (10  $\mu$ L, 70  $\mu$ mol) and **12** (24 mg, 70  $\mu$ mol). The reaction mixture was then stirred at room temperature for 4 hours, cooled to 0 °C and diluted with HCl (0.1 M, 5 mL) and EtOAc (5 mL). The layers were separated and the organic layer was further washed with HCl (0.1 M, 3 x 5 mL) and brine (5 mL), and the pooled aqueous layers were extracted with EtOAc (5 mL). The combined organic layers were dried (Na<sub>2</sub>SO<sub>4</sub>), filtered, and concentrated *in vacuo*. Purification by flash chromatography on silica gel (79:10:10:1 CH<sub>2</sub>Cl<sub>2</sub>:MeOH:Acetone:Water + 0.1% formic acid) gave the *title compound* (18.3 mg, 26  $\mu$ mol, 75%) as a yellow solid. <sup>1</sup>H NMR (400 MHz, CDCl<sub>3</sub>)  $\delta$  7.59 + 7.54 (2 x d, *J* = 2.1, 1H), 7.46 + 7.45 (2 x dd, *J* = 8.4, 2.1, 1H), 7.39 + 7.38 (2 x d, *J* = 15.3, 1H), 7.12 + 7.09 (2 x d, *J* = 8.5, 1H), 6.97-6.82 (m, 3H), 6.74-6.47 (m, 4H), 6.40 + 6.33 (2 x d, *J* = 2.0, 1H), 6.23 + 6.22 (2 x d, *J* = 2.0, 1H), 4.75 + 4.66 (2 x d, *J* = 8.5, 1H), 4.12 (t, *J* = 9.0) + 4.03 (dd, *J* = 11.7, 9.0, 1H), 3.79-3.53 (m, 3H), 3.29-3.11 (m, 2H), 2.75-2.56 (m, 1H), 2.16 + 2.08 (2 x p, *J* = 6.0, 1H), 1.70-1.43 (m, 2H) <sup>13</sup>C NMR (100 MHz, CDCl<sub>3</sub>)  $\delta$  180.1, 172.3, 167.8, 165.9, 162.9, 158.4, 158.3, 157.8, 149.9, 149.1, 146.6, 146.4, 138.5, 130.6, 128.8, 128.2, 122.9, 122.5, 122.3, 116.6, 116.5, 116.4, 116.2, 116.1, 115.6, 115.3, 115.2, 105.9, 99.8, 94.9, 70.5, 66.8, 48.0, 47.5, 36.9, 30.3, 29.8. HRMS (ESI-TOF): *m/z* calc'd for C<sub>38</sub>H<sub>34</sub>N<sub>2</sub>O<sub>12</sub>: 711.2185 [M+H]<sup>+</sup>; found: 711.2188



(*R*)-3-(3-azido-2-hydroxypropoxy)-5,7-bis(benzyloxy)-2-(3,4-bis(benzyloxy)phenyl)-4H-chromen-4-one (**26a**)

OR

(*S*)-3-(3-azido-2-hydroxypropoxy)-5,7-bis(benzyloxy)-2-(3,4-bis(benzyloxy)phenyl)-4H-chromen-4-one (**26b**)

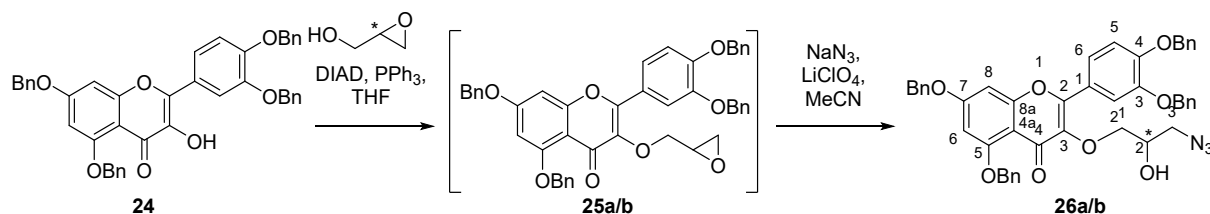

A solution of **24**<sup>3</sup> (520 mg, 0.78 mmol), *R*-glycidol (78  $\mu$ L, 1.2 mmol) and triphenylphosphine (310 mg, 1.2 mmol) in THF (15 mL) was cooled to 0 °C and treated dropwise with DIAD (0.24 mL, 1.2 mmol). The reaction mixture was stirred at 0 °C for 16 hours and was diluted with ethyl acetate and saturated aqueous NaHCO<sub>3</sub> (40 mL each). The aqueous layer was dried (Na<sub>2</sub>SO<sub>4</sub>), filtered, and concentrated *in vacuo*. The crude product was triturated with methanol (8.0 mL), filtered, and washed with methanol (5.0 mL) and dried under vacuum to provide intermediate epoxide **25b** as a pink solid, which was used in the next step without further purification.

Epoxide **25b** was taken up in acetonitrile (17 mL) and was treated with lithium perchlorate (220 mg, 2.1 mmol) and sodium azide (130 mg, 2.1 mmol) and stirred at 90 °C. Upon completion (2 h), the reaction mixture was diluted with water (10 mL) and extracted with ethyl acetate (20 mL). The combined organics were washed with water (20 mL) and brine (20 mL). The organic layer was dried (Na<sub>2</sub>SO<sub>4</sub>), filtered and concentrated *in vacuo*. The residue was purified by flash chromatography on silica gel (ethyl acetate/toluene 1:9) to provide *title compound* **26b** as a colourless solid (0.20 g, 0.26 mmol, 33%). <sup>1</sup>H NMR (300 MHz, CDCl<sub>3</sub>)  $\delta$  7.71 (d, *J* = 2.0 Hz, 1H, ArH), 7.64 (dd, *J* = 8.6, 2.0 Hz, 1H, ArH), 7.58 (d, *J* = 7.5, 2H, 2 x ArH), 7.50-7.30 (m, 18H, 18 x ArH), 7.05 (d, *J* = 8.6 Hz, 1 H, ArH), 6.54 (d, *J* = 2.1 Hz, 1 H, ArH), 6.48 (d, *J* = 2.1 Hz, 1 H, ArH), 6.03 (d, *J* = 3.2, 1 H, OH), 5.26 (s, 4H, 2 x CH<sub>2</sub>), 5.23 (s, 2H, CH<sub>2</sub>), 5.10 (s, 2H, CH<sub>2</sub>), 4.01-3.94 (m, 1H, CH), 3.83 (d, *J* = 4.5, 2H, CH<sub>2</sub>), 3.44-3.33 (m, 2H, CH<sub>2</sub>). <sup>13</sup>C NMR (75 MHz, CDCl<sub>3</sub>)  $\delta$  174.7 (C=O), 163.4 (C), 159.9 (C), 158.9 (C), 153.8 (C), 151.3 (C), 148.7 (C), 140.1 (C), 137.1 (C), 136.7 (C), 136.2 (C), 135.6 (C), 128.9 (2 x CH), 128.8 (4 x CH), 128.7 (2 x CH), 128.6 (CH), 128.2 (CH), 128.1 (CH), 127.9 (CH), 127.7 (2 x CH), 127.3 (4 x CH), 126.7 (2 x CH), 123.2 (C), 122.5 (CH), 114.9 (CH), 114.0 (CH), 109.5 (C), 98.4 (CH), 94.0 (CH), 75.3 (CH<sub>2</sub>), 71.5 (CH<sub>2</sub>), 71.02 (CH<sub>2</sub>), 70.97 (CH<sub>2</sub>), 70.7 (CH<sub>2</sub>), 69.7 (CH), 53.0 (CH<sub>2</sub>). HRMS (ESI-TOF): *m/z* calc'd for C<sub>46</sub>H<sub>39</sub>N<sub>3</sub>O<sub>8</sub>Na: 784.2635 [M+Na]<sup>+</sup>; found: 784.2637.

An equivalent reaction starting with *S*-glycidol provided **26a** in 50% yield, analytical data as above.

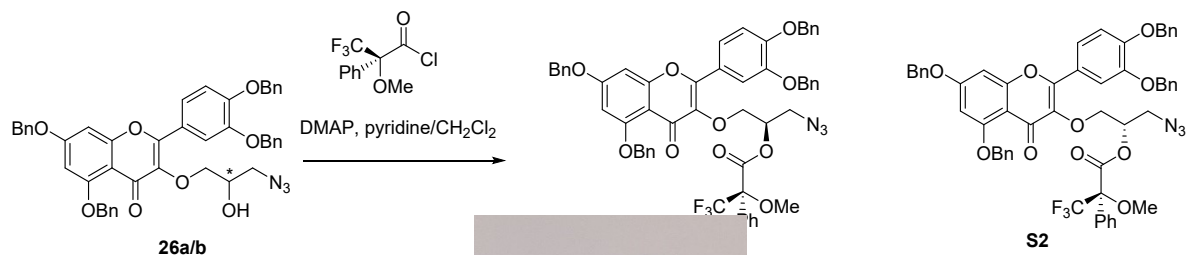

A solution of DMAP in pyridine (2 mg/mL) was added to a solution of alcohol (**26a** or **26b**, 1  $\mu\text{mol}$ ), followed by a solution of Mosher's acid chloride (10  $\mu\text{L}$ ). Stirred for 1 hour at room temperature, analysed by TLC (20 cm plate, 10% ethyl acetate in toluene, stained in 1%  $\text{FeCl}_3$  in  $\text{MeOH}/\text{H}_2\text{O}$  (1:1)).

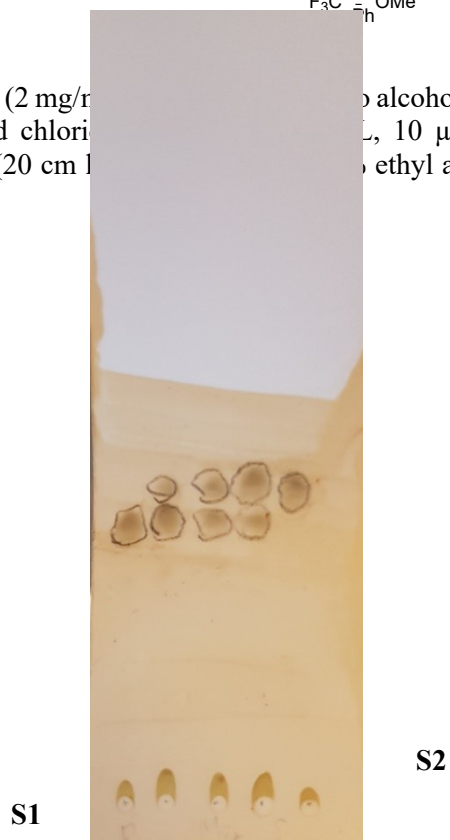

(*R*)-3-(3-Azido-2-((5-chloropentyl)oxy)propoxy)-5,7-bis(benzyloxy)-2-(3,4-bis(benzyloxy)phenyl)-4H-chromen-4-one (**27a**)

OR

(*S*)-3-(3-Azido-2-((5-chloropentyl)oxy)propoxy)-5,7-bis(benzyloxy)-2-(3,4-bis(benzyloxy)phenyl)-4H-chromen-4-one (**27b**)

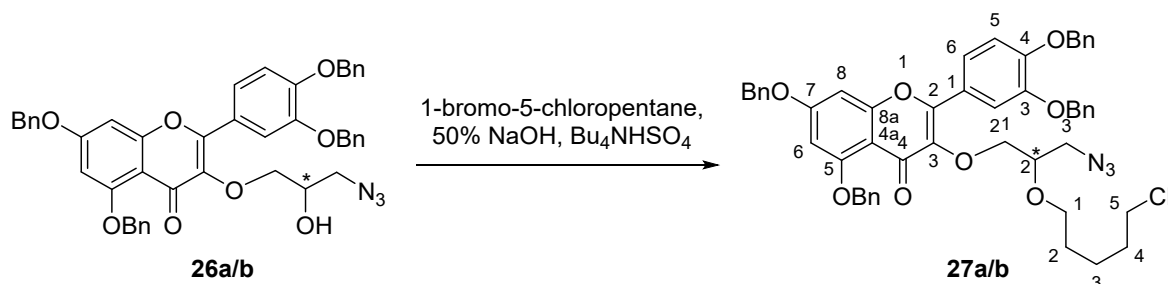

A solution of **26a** (360 mg, 0.47 mmol) in bromochloropentane (1.9 mL, 14 mmol) was treated with 50% NaOH (3.4 mL) and tetrabutylammonium bisulfate (48 mg, 0.14 mmol). The biphasic mixture was stirred vigorously at room temperature for 4 hours, and then was cooled to 0 °C and was treated with water (15 mL) and CH<sub>2</sub>Cl<sub>2</sub> (30 mL). The layers were separated and the aqueous layer was further extracted with CH<sub>2</sub>Cl<sub>2</sub> (3 x 20 mL). The combined organic extracts were washed with brine (30 mL), dried (MgSO<sub>4</sub>), filtered and concentrated *in vacuo*. Purification by flash chromatography on silica gel (5% ethyl acetate in toluene) gave *title compound* **27a** (330 mg, 0.38 mmol, 81%) as a colourless solid. <sup>1</sup>H NMR (300 MHz, CDCl<sub>3</sub>) δ 7.69-7.64 (m, 2H, 2 x ArH), 7.58 (d, *J* = 7.7, 2H, 2 x ArH), 7.51-7.28 (m, 18H, 18 x ArH), 7.03 (d, *J* = 8.5 Hz, 1 H, ArH), 6.52 (d, *J* = 2.2 Hz, 1 H, ArH), 6.45 (d, *J* = 2.2 Hz, 1 H, ArH), 5.26 (s, 6H, 3 x CH<sub>2</sub>), 5.09 (s, 2H, CH<sub>2</sub>), 4.13 (dd, *J* = 4.7, 10.3) + 4.03 (dd, *J* = 10.2, 5.4, 2 H, CH<sub>2</sub>), 3.74 (app p, *J* = 4.9, 1 H, CH), 3.57-3.33 (m, 6 H, 3 x CH<sub>2</sub>), 1.72 (p, *J* = 7.2, 2 H, CH<sub>2</sub>), 1.58-1.37 (m, 4 H, 2 x CH<sub>2</sub>). <sup>13</sup>C NMR (75 MHz, CDCl<sub>3</sub>) δ 173.6 (C=O), 162.9 (C), 159.9 (C), 158.8 (C), 152.8 (C), 151.1 (C), 148.6 (C), 140.2 (C), 137.2 (C), 136.8 (C), 136.5 (C), 135.8 (C), 128.9 (2 x CH), 128.7 (4 x CH), 128.7 (2 x CH), 128.6 (CH), 128.14 (CH), 128.06 (CH), 127.8 (CH), 127.7 (2 x CH), 127.5 (2 x CH), 127.3 (2 x CH), 126.8 (2 x CH), 123.7 (C), 122.8 (CH), 115.5 (CH), 114.0 (CH), 110.1 (C), 98.3 (CH), 94.0 (CH), 78.2 (CH), 71.7 (CH<sub>2</sub>), 71.1 (2 x CH<sub>2</sub>), 70.9 (CH<sub>2</sub>), 70.6 (CH<sub>2</sub>), 70.1 (CH<sub>2</sub>), 52.3 (CH<sub>2</sub>), 45.1 (CH<sub>2</sub>), 32.6 (CH<sub>2</sub>), 29.3 (CH<sub>2</sub>), 23.5 (CH<sub>2</sub>). HRMS (ESI-TOF): *m/z* calc'd for C<sub>51</sub>H<sub>49</sub>N<sub>3</sub>O<sub>8</sub>Cl: 866.3208 [M+H]<sup>+</sup>; found: 866.3209.

An equivalent reaction starting with **26b** provided **27b** in 91% yield, analytical data as above.

(*E*)-*N*-((*S*)-1-(((*R*)-2-((5-Chloropentyl)oxy)-3-((2-(3,4-dihydroxyphenyl)-5,7-dihydroxy-4-oxo-4H-chromen-3-yl)oxy)propyl)amino)-3-(4-hydroxyphenyl)-1-oxopropan-2-yl)-3-(3,4-dihydroxyphenyl)acrylamide (**30a**)

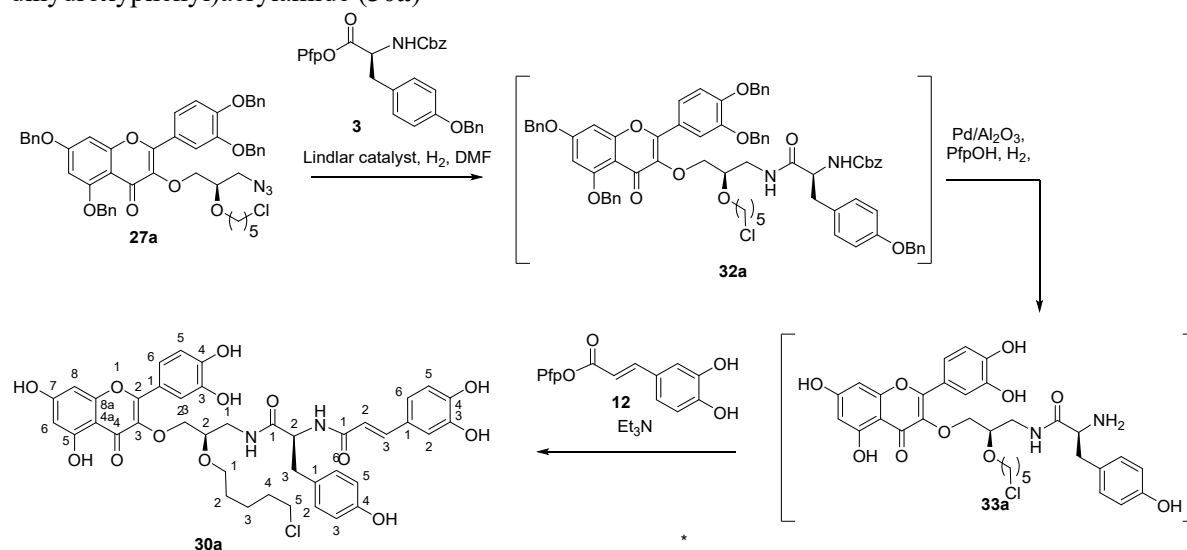

A solution of azide (**27a**) (174 mg, 0.201 mmol) and tyrosine derivative **3** (116 mg, 0.203 mol) in DMF (11.6 mL) was treated with Lindlar catalyst (174 mg), placed under hydrogen pressure (1 atm) and stirred for 16 hours at room temperature. The reaction mixture was filtered through celite, and the celite washed with DMF (2.50 mL) to give a solution of amide **32a**. This solution was treated with 5% palladium on alumina (54.0 mg) and pentafluorophenol (148 mg, 0.803 mmol), placed under hydrogen pressure (1 atm) and stirred for 16 hours at room temperature. The reaction mixture was filtered through celite, and the celite washed with DMF (5.0 mL) to give a solution of amine **33a**. This solution was evacuated-backfilled with argon, cooled to 0 °C and treated with **12** (140 mg, 0.402 mmol) and triethylamine (56.8 μL, 0.402 mmol). The reaction mixture was stirred at room temperature for 48 hours at room temperature, cooled to 0 °C and diluted with ethyl acetate (80 mL) and 0.1 M HCl (30 mL). The layers were separated and the organic layer further washed with 0.1 M HCl (30 mL) and brine (30 mL). The pooled aqueous washes were back-extracted with ethyl acetate (30 mL) and the combined organics were dried (Na<sub>2</sub>SO<sub>4</sub>), filtered, and concentrated *in vacuo*. Purification by silica gel chromatography (79:10:10:1 CH<sub>2</sub>Cl<sub>2</sub>:Acetone:MeOH:H<sub>2</sub>O + 0.1% HCOOH to 73:12.5:12.5:2 CH<sub>2</sub>Cl<sub>2</sub>:Acetone:MeOH:H<sub>2</sub>O + 0.1% HCOOH) gave the *title compound* (65.0 mg, 0.081 mmol, 40%) as a yellow powder. <sup>1</sup>H NMR (400 MHz, CDCl<sub>3</sub>) δ 7.56 (d, *J* = 2.1, 1H), 7.53 (dd, *J* = 8.6, 2.1, 1H), 7.31 (d, *J* = 15.6, 1H), 7.05 (d, *J* = 8.5, 2H), 6.92 (d, *J* = 1.8, 1H), 6.86 (d, *J* = 8.4, 1H), 6.79 (dd, *J* = 8.3, 1.8), 6.70 (d, *J* = 8.1, 1H), 6.57 (d, *J* = 8.5, 2H), 6.38 (d, *J* = 15.6, 1H), 6.30 (d, *J* = 1.7, 1H), 6.18 (d, *J* = 1.7, 1H), 4.71 (t, *J* = 7.5, 1H), 3.77-3.68 (m, 2H), 3.50 (t, *J* = 6.7, 2H), 3.44-3.37 (m, 3H), 3.24 (dd, *J* = 10.3, 2.2, 1H), 3.04 (dd, *J* = 13.6, 7.8, 1H), 2.91 (dd, *J* = 13.6, 7.5, 1H), 1.72 (p, *J* = 7.2, 2H), 1.57-1.50 (m, 2H), 1.45-1.37 (m, 2H). <sup>13</sup>C NMR (100 MHz, CDCl<sub>3</sub>) δ 179.6, 174.0, 169.0, 165.8, 162.7, 158.2, 158.0, 157.2, 149.9, 148.7, 146.5, 146.4, 143.0, 138.0, 131.4 (x2), 129.0, 128.0, 122.73, 122.69, 122.2, 117.7, 116.5, 116.4, 116.3, 116.2 (x2), 115.2, 105.8, 99.9, 94.8, 77.1, 70.5, 57.3, 45.7, 40.3, 38.4, 33.6, 30.1, 24.5. HRMS (ESI-TOF): *m/z* calc'd for C<sub>41</sub>H<sub>42</sub>ClN<sub>2</sub>O<sub>13</sub>: 805.2370 [M+H]<sup>+</sup>; found: 805.2371

(*E*)-*N*-((*S*)-1-(((*S*)-2-((5-Chloropentyl)oxy)-3-((2-(3,4-dihydroxyphenyl)-5,7-dihydroxy-4-oxo-4H-chromen-3-yl)oxy)propyl)amino)-3-(4-hydroxyphenyl)-1-oxopropan-2-yl)-3-(3,4-dihydroxyphenyl)acrylamide (**30b**)

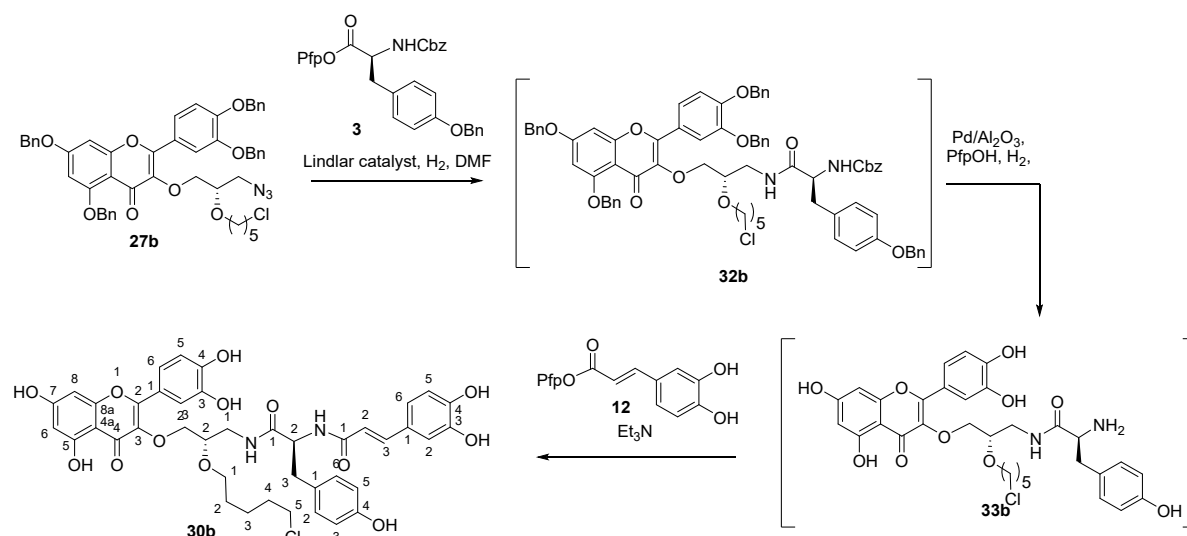

A solution of azide (**27b**) (96 mg, 0.11 mmol) and tyrosine derivative **3** (64 mg, 0.11 mol) in DMF (6.0 mL) was treated with Lindlar catalyst (96 mg), placed under hydrogen pressure (1 atm) and stirred for 16 hours at room temperature. The reaction mixture was filtered through celite, and the celite washed with DMF (2.5 mL) to give a solution of amide **32a**. This solution was treated with 5% palladium on alumina (30 mg) and pentafluorophenol (82 mg, 0.44 mmol), placed under hydrogen pressure (1 atm) and stirred for 4 hours at room temperature. The reaction mixture was filtered through celite, and the celite washed with DMF (2.5 mL) to give a solution of amine **33a**. This solution was evacuated-backfilled with argon, cooled to 0 °C and treated with **12** (77 mg, 0.22 mmol) and triethylamine (31 μL, 0.22 mmol). The reaction mixture was stirred at room temperature for 16 hours at room temperature, cooled to 0 °C and diluted with ethyl acetate (80 mL) and 0.1 M HCl (30 mL). The layers were separated and the organic layer further washed with 0.1 M HCl (30 mL) and brine (30 mL). The pooled aqueous washes were back-extracted with ethyl acetate (30 mL) and the combined organics were dried (Na<sub>2</sub>SO<sub>4</sub>), filtered, and concentrated *in vacuo*. Purification by silica gel chromatography (79:10:10:1 CH<sub>2</sub>Cl<sub>2</sub>:Acetone:MeOH:H<sub>2</sub>O + 0.1% HCOOH to 73:12.5:12.5:2 CH<sub>2</sub>Cl<sub>2</sub>:Acetone:MeOH:H<sub>2</sub>O + 0.1% HCOOH) gave the *title compound* (50 mg, 0.06 mmol, 56%) as a yellow powder. <sup>1</sup>H NMR (400 MHz, CDCl<sub>3</sub>) δ 7.56 (bs, 1H), 7.52 (d, *J* = 8.3, 1H), 7.30 (d, *J* = 15.7, 1H), 7.08 (d, *J* = 8.3, 2H), 6.92 (bs, 1H), 6.85 (d, *J* = 8.4), 6.80 (d, *J* = 8.1, 1H), 6.71-6.66 (m, 3H), 6.37 (d, *J* = 15.7, 1H), 6.30 (bs, 1H), 6.16 (bs, 1H), 4.69 (t, *J* = 7.2, 1H), 3.85-3.78 (m, 2H), 3.55-3.45 (m, 5H) 3.39-3.35 (m, 2H), 3.09 (dd, *J* = 13.5, 6.5, 1H), 2.92 (dd, *J* = 13.5, 8.0, 1H), 1.68 (p, *J* = 7.1, 2H), 1.53-1.45 (m, 2H), 1.42-1.36 (m, 2H) <sup>13</sup>C NMR (100 MHz, CDCl<sub>3</sub>) δ 179.6, 174.1 + 174.0, 169.0, 165.7, 164.7, 162.8, 158.2, 157.9, 149.8, 148.7, 146.5, 146.3, 142.9, 138.1, 131.3 (x2), 129.1, 128.1, 122.8, 122.7, 122.2, 117.7, 116.6, 116.4 (x2), 116.3 (x2), 115.2, 105.8, 99.8, 94.8, 77.7, 71.8, 70.6, 57.2 + 57.1, 45.7, 40.7 + 40.6, 38.3, 33.6, 30.2, 24.5. HRMS (ESI-TOF): *m/z* calc'd for C<sub>41</sub>H<sub>42</sub>ClN<sub>2</sub>O<sub>13</sub>: 805.2370 [M+H]<sup>+</sup>; found: 805.2368.

(*E*)-*N*-((*S*)-1-(((*R*)-2-((5-Azidopentyl)oxy)-3-((2-(3,4-dihydroxyphenyl)-5,7-dihydroxy-4-oxo-4H-chromen-3-yl)oxy)propyl)amino)-3-(4-hydroxyphenyl)-1-oxopropan-2-yl)-3-(3,4-dihydroxyphenyl)acrylamide (**34a**)

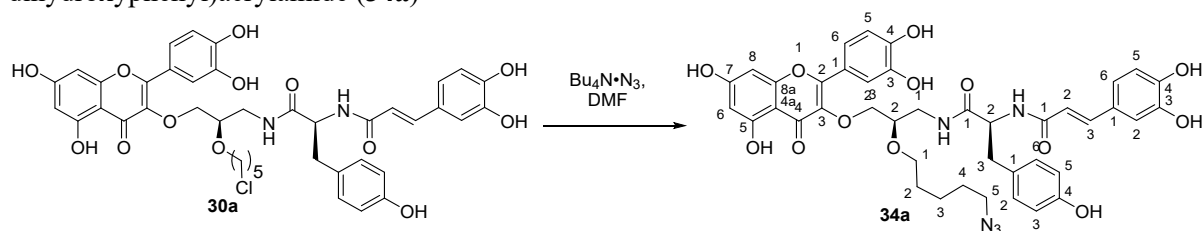

A solution of **30a** (40 mg, 50  $\mu$ mol) in DMF (0.5 mL) was treated with tetrabutylammonium azide (100 mg, 350  $\mu$ mol) and stirred at 60  $^{\circ}$ C for 21 hours. The reaction mixture was diluted with ethyl acetate (10 mL), washed with HCl (0.1 M, 3 x 5 mL) and brine (10 mL). The organic layer was dried ( $\text{Na}_2\text{SO}_4$ ), filtered and concentrated *in vacuo*. Purification by flash chromatography on silica gel (79:10:10:1  $\text{CH}_2\text{Cl}_2$ :Acetone:MeOH:H<sub>2</sub>O + 0.1% HCOOH) gave the *title compound* (26.5 mg, 33  $\mu$ mol, 65%). <sup>1</sup>H NMR (300 MHz,  $\text{CDCl}_3$ )  $\delta$  7.57 (d,  $J$  = 2.0, 1H), 7.54 (dd,  $J$  = 8.4, 2.1, 1H), 7.31 (d,  $J$  = 15.7, 1H), 7.05 (d,  $J$  = 8.4, 2H), 6.92 (d,  $J$  = 1.8, 1H), 6.87 (d,  $J$  = 8.4, 1H), 6.79 (dd,  $J$  = 8.3, 1.8, 1H), 6.70 (d,  $J$  = 8.2, 1H), 6.57 (d,  $J$  = 8.4, 2H), 6.38 (d,  $J$  = 15.7, 1H), 6.32 (d,  $J$  = 1.9, 1H), 6.19 (d,  $J$  = 1.9, 1H), 4.70 (t,  $J$  = 7.5, 1H), 3.76-3.68 (m, 2H), 3.45-3.33 (m, 4H), 3.28-3.21 (m, 3H), 3.04 (dd,  $J$  = 13.7, 7.6, 1H), 2.91 (dd,  $J$  = 13.7, 7.6, 1H), 1.61-1.50 (m, 4H), 1.41-1.33 (m, 2H). <sup>13</sup>C NMR (75 MHz,  $\text{CDCl}_3$ )  $\delta$  179.7, 173.9, 169.0, 165.9, 162.8, 158.3, 158.1, 157.3, 149.9, 148.8, 146.5, 146.4, 143.0, 138.1, 131.4 (x2), 129.0, 128.1, 122.8, 122.7, 122.2, 117.7, 116.6, 116.4 (x2), 116.2 (x2), 115.2, 105.8, 99.9, 94.8, 77.2, 71.2, 70.5, 57.3, 52.4, 40.3, 38.4, 30.4, 29.7, 24.4. HRMS (ESI-TOF):  $m/z$  calc'd for  $\text{C}_{41}\text{H}_{42}\text{N}_5\text{O}_{13}$ : 812.2774 [M+H]<sup>+</sup>; found: 812.2771.

(*E*)-*N*-((*S*)-1-(((*S*)-2-((5-Azidopentyl)oxy)-3-((2-(3,4-dihydroxyphenyl)-5,7-dihydroxy-4-oxo-4H-chromen-3-yl)oxy)propyl)amino)-3-(4-hydroxyphenyl)-1-oxopropan-2-yl)-3-(3,4-dihydroxyphenyl)acrylamide (**34b**)

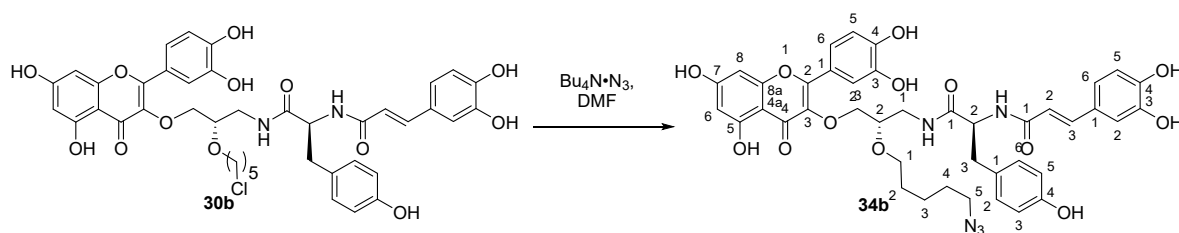

A solution of **30b** (40 mg, 50  $\mu\text{mol}$ ) in DMF (0.5 mL) was treated with tetrabutylammonium azide (100 mg, 350  $\mu\text{mol}$ ) and stirred at 60  $^{\circ}\text{C}$  for 21 hours. The reaction mixture was diluted with ethyl acetate (10 mL), washed with HCl (0.1 M, 3 x 5 mL) and brine (10 mL). The organic layer was dried ( $\text{Na}_2\text{SO}_4$ ), filtered and concentrated *in vacuo*. Purification by flash chromatography on silica gel (79:10:10:1  $\text{CH}_2\text{Cl}_2$ :Acetone:MeOH:H<sub>2</sub>O + 0.1% HCOOH) gave the *title compound* (29.8 mg, 37  $\mu\text{mol}$ , 73%). <sup>1</sup>H NMR (300 MHz,  $\text{CDCl}_3$ )  $\delta$  7.56 (bs, 1H), 7.52 (d,  $J = 8.3$ , 1H), 7.30 (d,  $J = 15.7$ , 1H), 7.08 (d,  $J = 8.3$ , 2H), 6.92 (bs, 1H), 6.85 (d,  $J = 8.4$ ), 6.80 (d,  $J = 8.1$ , 1H), 6.71-6.66 (m, 3H), 6.37 (d,  $J = 15.7$ , 1H), 6.30 (bs, 1H), 6.16 (bs, 1H), 4.69 (t,  $J = 7.2$ , 1H), 3.85-3.78 (m, 2H), 3.55-3.45 (m, 5H), 3.39-3.35 (m, 2H), 3.09 (dd,  $J = 13.5$ , 6.5, 1H), 2.92 (dd,  $J = 13.5$ , 8.0, 1H), 1.68 (p,  $J = 7.1$ , 2H), 1.53-1.45 (m, 2H), 1.42-1.36 (m, 2H) <sup>13</sup>C NMR (75 MHz,  $\text{CDCl}_3$ )  $\delta$  179.7, 174.0, 169.0, 165.8, 162.9, 158.3, 158.0, 157.2, 149.9, 148.8, 146.5, 146.3, 142.9, 138.2, 131.3 (x2), 129.2, 128.1, 122.8, 122.7, 122.2, 117.7, 116.6, 116.4 (x2), 116.3 (x2), 115.2, 105.8, 99.8, 94.8, 77.7, 71.9, 70.6, 57.1, 52.4, 40.6, 38.3, 30.5, 29.7, 24.3. HRMS (ESI-TOF):  $m/z$  calc'd for  $\text{C}_{41}\text{H}_{42}\text{N}_5\text{O}_{13}$ : 812.2774  $[\text{M}+\text{H}]^+$ ; found: 812.2761.

(*E*)-3-(3,4-dihydroxyphenyl)-*N*-((*S*)-1-(((*S*)-3-((2-(3,4-dihydroxyphenyl)-5,7-dihydroxy-4-oxo-4H-chromen-3-yl)oxy)-2-((5-(4-((2-(methoxyPEG)acetamido)methyl)-1H-1,2,3-triazol-1-yl)pentyl)oxy)propyl)amino)-3-(4-hydroxyphenyl)-1-oxopropan-2-yl)acrylamide (**36a**)

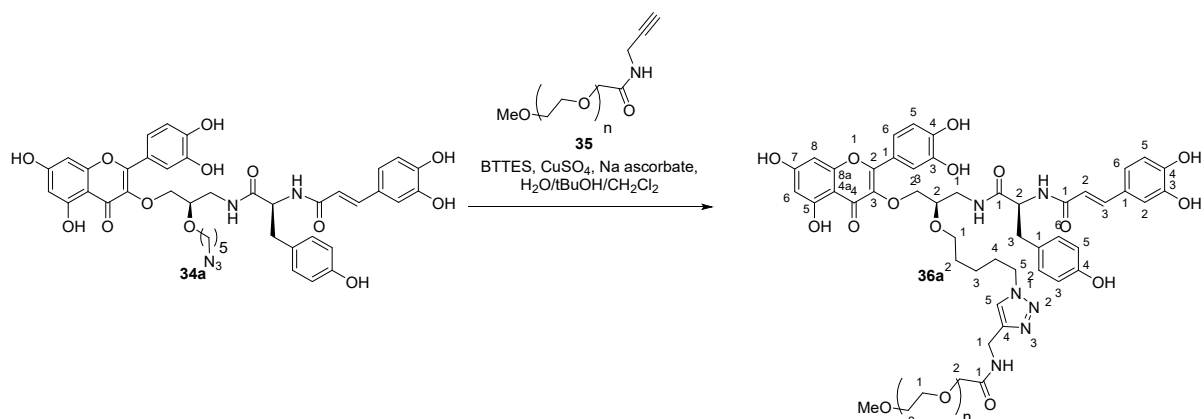

A suspension of **34a** (6.5 mg, 8 μmol), PEG-5000 alkyne **35**<sup>4</sup> (20 mg, 4 μmol), and BTTES ligand (0.2 mg, 0.4 μmol) in CH<sub>2</sub>Cl<sub>2</sub> (0.2 mL) and tBuOH (0.4 mL) treated with a solution of CuSO<sub>4</sub>•5H<sub>2</sub>O (0.1 mg, 0.4 μmol) in water (0.1 mL) and sodium ascorbate (0.86 mg, 4.8 μmol) in water (0.1 mL). Stirred at room temperature for 39 hours and concentrated *in vacuo*. The residue was diluted with CH<sub>2</sub>Cl<sub>2</sub> (1 mL), filtered through celite and concentrated *in vacuo*. The residue was dissolved in DMF (0.5 mL), cooled to 0 °C and precipitated with Et<sub>2</sub>O. The precipitate was collected by centrifugation and washed with ice-cold Et<sub>2</sub>O (2 x 1 mL) to give a pale yellow solid (22.8 mg, 98% from **35**).

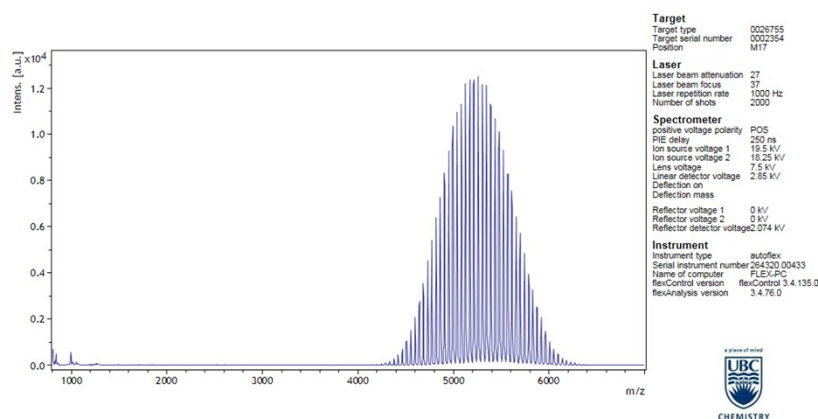

Figure 1: MALDI-TOF analysis of **35**

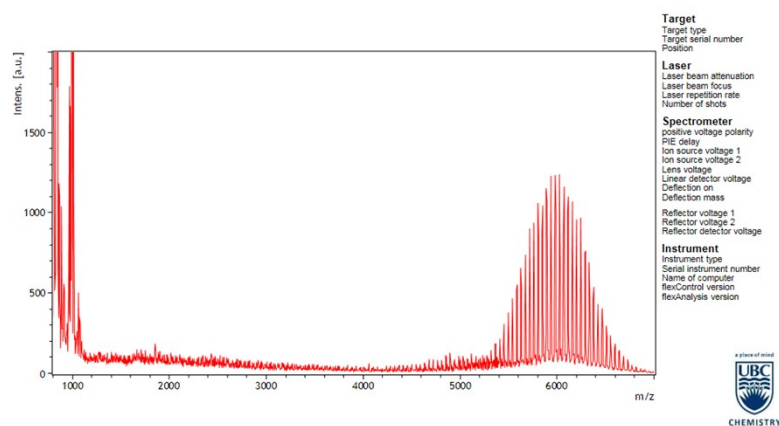

Figure 2: MALDI-TOF analysis of **36a**



(*E*)-3-(3,4-dihydroxyphenyl)-*N*-((*S*)-1-(((*S*)-3-((2-(3,4-dihydroxyphenyl)-5,7-dihydroxy-4-oxo-4H-chromen-3-yl)oxy)-2-((5-(4-((2-(methoxyPEG)acetamido)methyl)-1H-1,2,3-triazol-1-yl)pentyl)oxy)propyl)amino)-3-(4-hydroxyphenyl)-1-oxopropan-2-yl)acrylamide (**36b**)

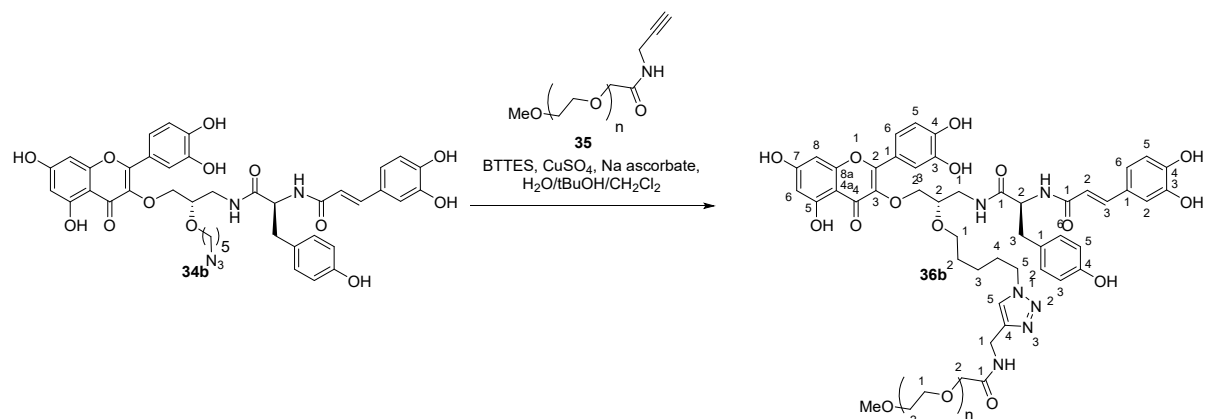

A suspension of **34b** (6.5 mg, 8  $\mu$ mol), PEG-5000 alkyne **35** (20 mg, 4  $\mu$ mol), and BTTES ligand (0.2 mg, 0.4  $\mu$ mol) in  $\text{CH}_2\text{Cl}_2$  (0.2 mL) and *t*BuOH (0.4 mL) treated with a solution of  $\text{CuSO}_4 \cdot 5\text{H}_2\text{O}$  (0.1 mg, 0.4  $\mu$ mol) in water (0.1 mL) and sodium ascorbate (0.86 mg, 4.8  $\mu$ mol) in water (0.1 mL). Stirred at room temperature for 19 hours and concentrated *in vacuo*. The residue was diluted with  $\text{CH}_2\text{Cl}_2$  (1 mL), filtered through celite and concentrated *in vacuo*. The residue was dissolved in DMF (0.5 mL), cooled to 0  $^\circ\text{C}$  and precipitated with  $\text{Et}_2\text{O}$ . The precipitate was collected by centrifugation and washed with ice-cold  $\text{Et}_2\text{O}$  (2 x 1 mL) to give a pale yellow solid (18 mg, 77% from **35**).

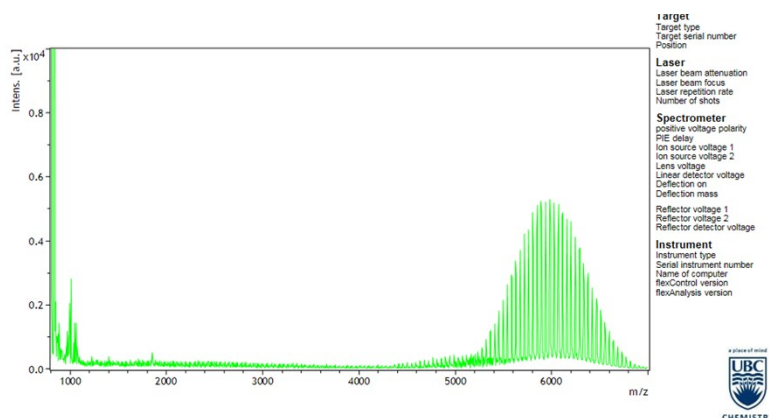

Figure 3: MALDI-TOF analysis of **36b**

(*E*)-3-(3,4-dihydroxyphenyl)-*N*-(((*S*)-1-(((*S*)-3-((2-(3,4-dihydroxyphenyl)-5,7-dihydroxy-4-oxo-4H-chromen-3-yl)oxy)-2-((5-(4-((2-(methoxyPEG)amino)methyl)-1H-1,2,3-triazol-1-yl)pentyl)oxy)propyl)amino)-3-(4-hydroxyphenyl)-1-oxopropan-2-yl)-1H-1,2,3-triazol-1-yl)-(2-*O*-methyl)- $\alpha$ -D-cycloheptoglucose (**38a**)

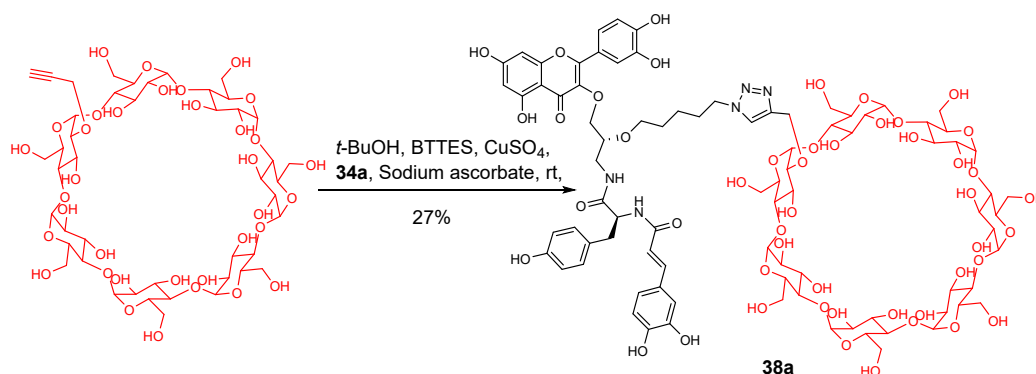

A suspension of  $\beta$ -CD alkyne **37** (23 mg, 19.6  $\mu$ mol), **34a** (16 mg, 19.7  $\mu$ mol), and BTES ligand (12 mg, 24.3  $\mu$ mol) in *t*-BuOH (4.8 mL) was treated with a solution of  $\text{CuSO}_4 \cdot 5\text{H}_2\text{O}$  (40 mg, 0.16 mmol) in water (1.2 mL) and sodium ascorbate (16 mg, 80  $\mu$ mol) in water (1.2 mL). The mixture was stirred for 6 days at room temperature. The solution was concentrated *in vacuo*, re-dissolved in  $\text{H}_2\text{O}$  (5.0 mL), and lyophilized. The solid was dissolved in MeOH (1.0 mL), filtered and washed with MeOH to remove the solids, and the filtrate was concentrated *in vacuo*. Purification by flash chromatography on silica gel (9:1, 5:1 & 3:1  $\text{CH}_3\text{CN}:\text{H}_2\text{O}$  with 1%  $\text{HCOOH}$ ) gave the *title compound* (10.7 mg, 5.4  $\mu$ mol, 27%).  $^{13}\text{C}$  NMR (151 MHz,  $d_6$ -DMSO)  $\delta$  177.69, 171.64, 165.43, 163.92, 160.82, 156.33, 155.73, 155.52, 148.45, 147.10, 145.20, 144.98, 143.47, 139.73, 136.58, 129.99, 127.93, 126.25, 123.95, 121.16, 120.82, 120.51, 117.87, 115.64, 115.46, 115.35, 114.76, 113.93, 104.06, 101.86, 101.83, 101.57, 100.08, 98.53, 93.66, 81.96, 81.45, 81.34, 81.19, 79.32, 76.34, 72.87, 72.45, 72.11, 71.94, 71.67, 71.59, 71.14, 69.70, 68.74, 64.27, 59.76, 54.68, 49.35, 39.52, 39.38, 39.24, 39.10, 38.96, 38.82, 38.68, 36.86, 29.58, 28.90, 28.73, 28.59, 22.44, 22.03. MS (MALDI):  $m/z$  calc'd for  $\text{C}_{86}\text{H}_{113}\text{N}_5\text{O}_{48}$ : 2007.8 [ $\text{M}+\text{Na}$ ] $^+$ ; found: 2007.8.

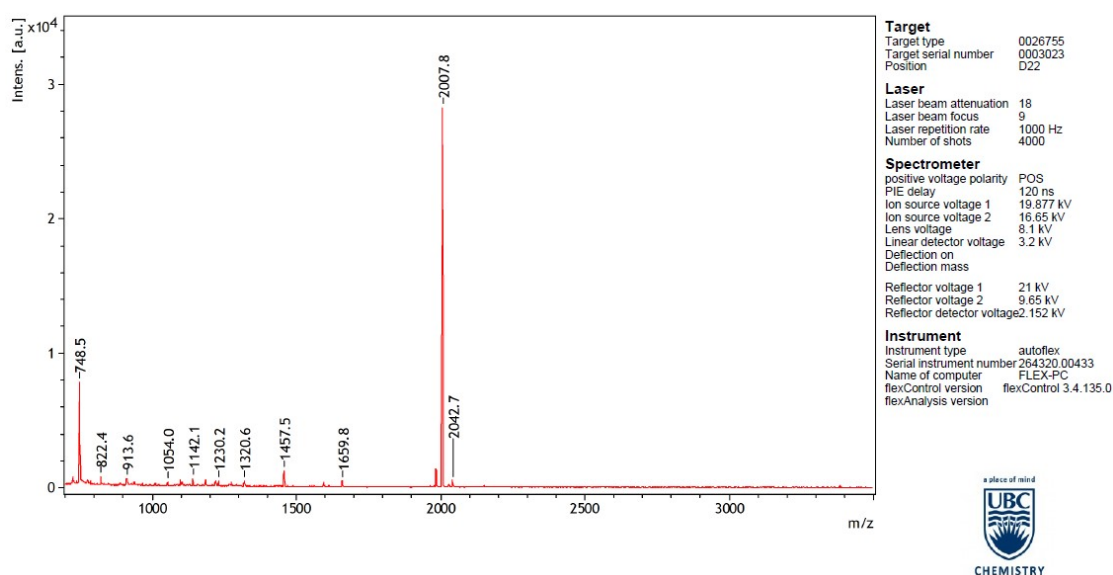

Figure 4: **38a** MALDI

(2-(polyethyleneglycolyl)azidoethyl)aminoethane **41**, & **42** (PEG600 {n = ~13} **42** as an example)

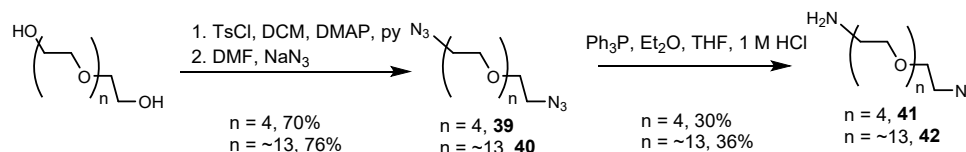

A solution of TsCl (3.33 g, 17.5 mmol) in  $\text{CH}_2\text{Cl}_2$  (10 mL) was added slowly over 30 min to a mixture of pyridine (5 mL), PEG600 (2.1 g, 3.5 mmol) and DMAP (0.3 g) in  $\text{CH}_2\text{Cl}_2$  (10 mL) at 0 °C. The mixture was stirred at 0 °C for 2 h, then gradually warmed to room temperature and stirred overnight. The reaction mixture was diluted with ethyl acetate (300 mL), washed with 1M HCl (2 x 100 mL), saturated  $\text{NaHCO}_3$  (100 mL) and brine (100 mL). The organic layer was dried over  $\text{MgSO}_4$ , filtered and concentrated. The resulting residual was purified by flash column chromatography on silica gel (50:1 and 25:1 DCM:MeOH) to afford the tosylated PEG as an oil (2.69 g, 2.96 mmol, 84%). The tosylated PEG was then dissolved in DMF (30 mL), and  $\text{NaN}_3$  (0.87 g, 13.4 mmol) was added. The mixture was stirred overnight at 50 °C, before cooling to room temperature. The mixture was diluted with ethyl acetate (200 mL), washed with water (2 x 50 mL) and brine (50 mL). The aqueous phase was extracted with ethyl acetate (4 x 100 mL). The combined organic phase was dried over  $\text{MgSO}_4$ , filtered and concentrated. The crude product was purified by flash column chromatography on silica gel (15:1 DCM:MeOH) gave the di-azido-PEG derivatives **40** (1.742 g, 2.68 mmol, 91%). To the di-azido-PEG derivatives **40** (1.742 g) in ether (3.5 mL)/THF (0.8 mL)/1M HCl (3.5 mL) with vigorously stirring at room temperature, was added  $\text{PPh}_3$  (702 mg, 2.68 mmol) in  $\text{Et}_2\text{O}$  (16 mL) slowly dropwise over the course of 2.5 h. The mixture was then stirred for an additional 24 h at room temperature. Upon completion, water (20 mL) was added, and the two layers were separated. The aqueous layer was extracted with ether (3 x 10 mL). The aqueous phase was cooled with an ice bath, and solid NaOH was added until the pH was >12, extracted with DCM (3 x 30 mL). The organic phase was washed with brine (30 mL), dried over  $\text{MgSO}_4$ , filtered and evaporated. The resulting residual was purified by flash column chromatography on silica gel (9:1 DCM:MeOH, with 1% v/v 1M  $\text{NH}_4\text{OH}$ ) to afford the product **42** as an oil (597 mg, 0.96 mmol, 36%).  $^1\text{H}$  NMR (400 MHz,  $\text{CDCl}_3$ )  $\delta$  7.84 (brs), 3.79 (t, J 4.88 Hz), 3.62 (brd, J 4.96 Hz), 3.55 (m), 3.28 (t, J 4.92 Hz), 3.09 (brd, J 4.60 Hz).  $^{13}\text{C}$  NMR (100 MHz,  $\text{CDCl}_3$ )  $\delta$  70.69, 70.66, 70.63, 70.56, 70.51, 70.47, 70.45, 70.41, 70.39, 70.34, 70.21, 70.19, 70.13, 70.05, 70.00, 69.93, 66.81, 50.72, 40.28. Product **41** was obtained as a slightly yellow oil in 62% overall yield.  $^1\text{H}$  NMR (400 MHz,  $\text{CDCl}_3$ )  $\delta$  3.68-3.62 (m, 12 H), 3.52 (t, 2 H, J 5.20 Hz), 3.39 (t, 2 H, J 5.04 Hz), 2.87 (t, 2 H, J 5.20 Hz), 1.74 (brs, 2 H).  $^{13}\text{C}$  NMR (100 MHz,  $\text{CDCl}_3$ )  $\delta$  73.34, 70.67, 70.63, 70.26, 70.02, 50.66, 41.76. ESI-MS: m/z calc'd for  $\text{C}_8\text{H}_{18}\text{N}_4\text{O}_3$ : 219.1 [M+H]<sup>+</sup>; found: 219.2.

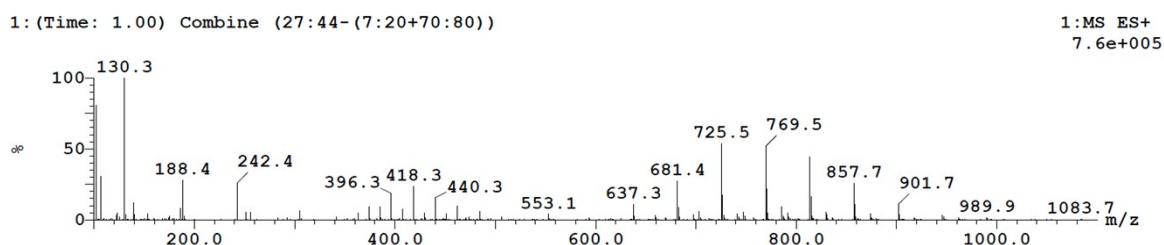

Figure 5: **42** ESI-MS

(*E*)-3-(3,4-dihydroxyphenyl)-*N*-((*S*)-1-(((*S*)-3-((2-(3,4-dihydroxyphenyl)-5,7-dihydroxy-4-oxo-4H-chromen-3-yl)oxy)-2-((5-(4-((2-(polyethyleneglycolyl)amino)methyl)-1H-1,2,3-triazol-1-yl)pentyl)oxy)propyl)amino)-3-(4-hydroxyphenyl)-1-oxopropan-2-yl)-1H-1,2,3-triazol-1-yl-(2-*O*-methyl)- $\alpha$ -D-cycloheptoglucose (**47a**, **48a**, & **47a** used as an example)

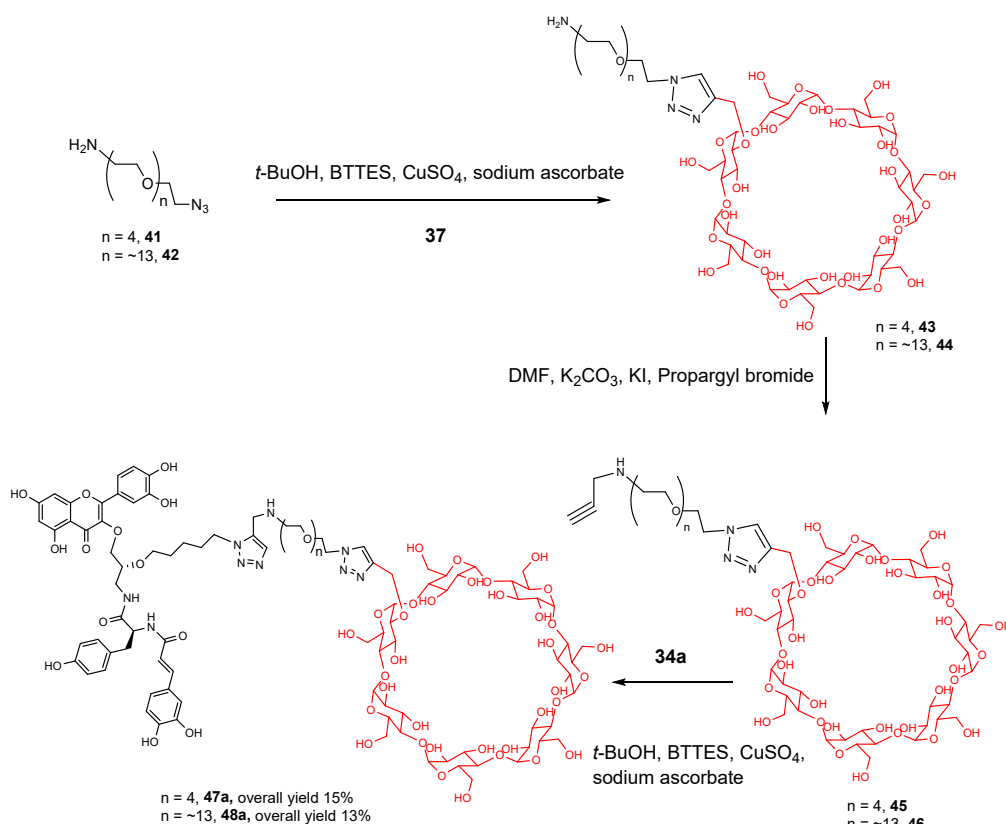

A suspension of  $\beta$ -CD alkyne **37** (126 mg, 0.11 mmol), PEG-200 azide **41** (70 mg, 0.32 mmol), and BTTES ligand (73 mg, 0.15 mmol) in *t*-BuOH (10 mL) was treated with aqueous solutions of  $\text{CuSO}_4$  (0.133 M, 7 mL) and sodium ascorbate (0.066 M, 7 mL), and the mixture was stirred for 24 h at room temperature. After evaporation, the resulting residue was purified by flash column chromatography on silica gel (4:1:1,  $\text{CH}_3\text{CN}:\text{H}_2\text{O}:\text{NH}_4\text{OH}$ ), the fractions were combined and evaporated, redissolved in water and lyophilized to afford an off-white solid (**43**, 183 mg, not pure). The solid (117 mg) was dissolved in dry DMF (20 mL) under  $\text{N}_2$  at room temperature, and then were added anhydrous  $\text{K}_2\text{CO}_3$  (70 mg, 0.51 mmol), KI (2 mg, 12  $\mu\text{mol}$ ) and propargyl bromide (80% in toluene) (9  $\mu\text{L}$ , 83.5  $\mu\text{mol}$ ), the reaction mixture was stirred for 24 h in the dark at room temperature under  $\text{N}_2$ , filtered through Celite and concentrated. The resulting residues was purified by flash column chromatography on silica gel (5:1:1, 4.5:1:1, 4:1:1,  $\text{CH}_3\text{CN}:\text{H}_2\text{O}:\text{NH}_4\text{OH}$ ) to give by-product, product (**45**, 21 mg) and starting material respectively. A suspension of **45** (12 mg, 8.4  $\mu\text{mol}$ ), **34a** (4.6 mg, 5.7  $\mu\text{mol}$ ) and BTTES (3.5 mg, 7.1  $\mu\text{mol}$ ) in *t*-BuOH (1.6 mL) was treated with  $\text{CuSO}_4 \cdot 5\text{H}_2\text{O}$  (0.133 M, 0.41 mL) and sodium ascorbate (0.066 M, 0.41 mL), and the reaction mixture was stirred for 19 h at room temperature. The product was precipitated out on the wall of flask, solution was poured out and washed with MeOH. The precipitate was dissolved water, loaded on SepPak ( $\text{C}_{18}$ ), eluted with water, MeOH and MeOH with 1% HCOOH. The fractions were combined and evaporated. The residue was redissolved in water and lyophilized to afford the desired product (**47a**, 5.7 mg, 2.5  $\mu\text{mol}$ , 45%). Overall yield based on alkyne: **47a**, 15%; **48a**, 13%.

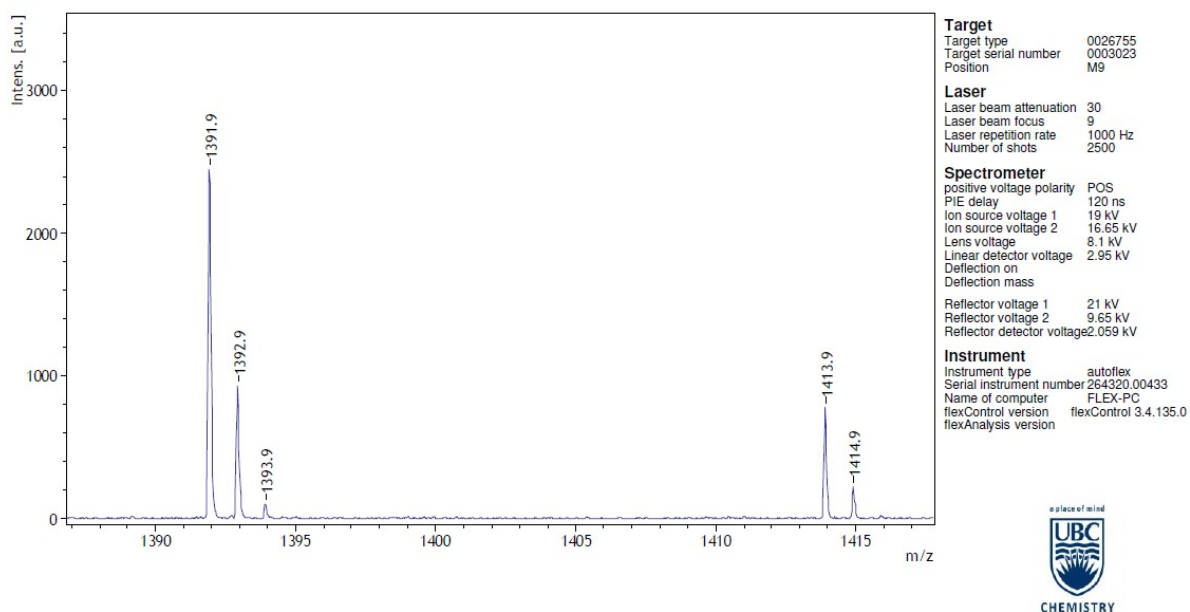

Figure 6: 43 MALDI

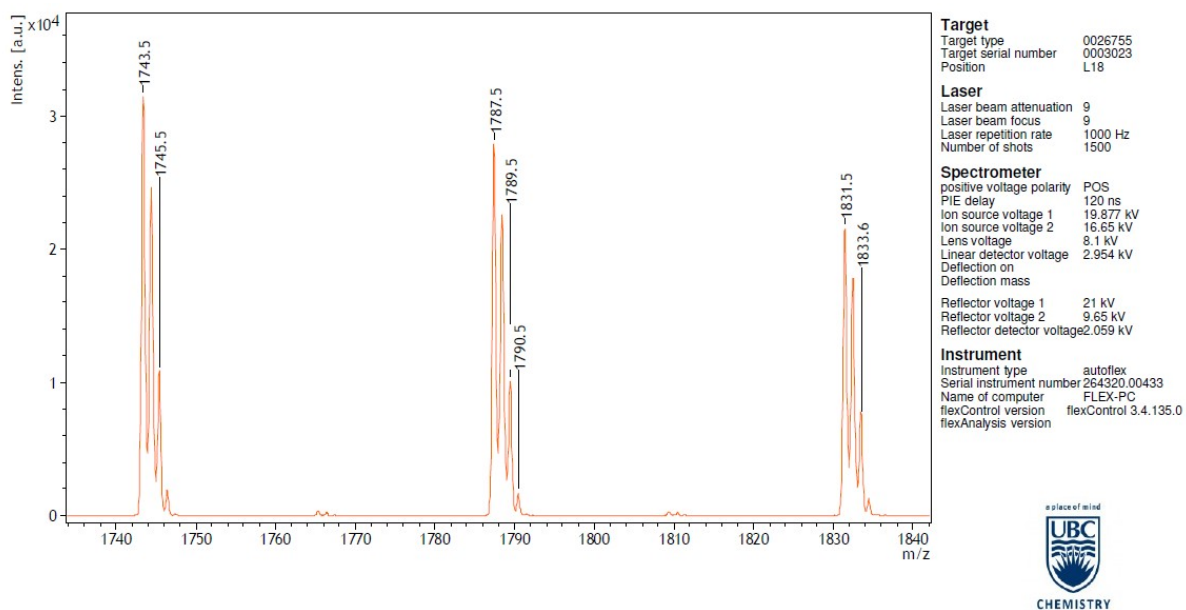

Figure 7: 44 MALDI

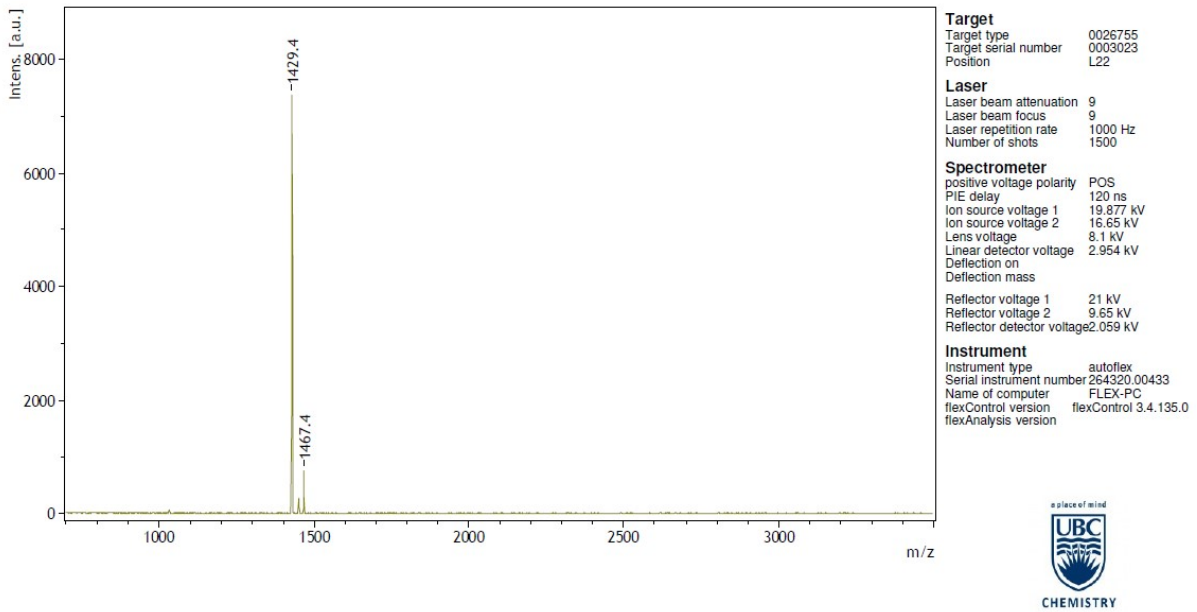

Figure 8: 45 MALDI

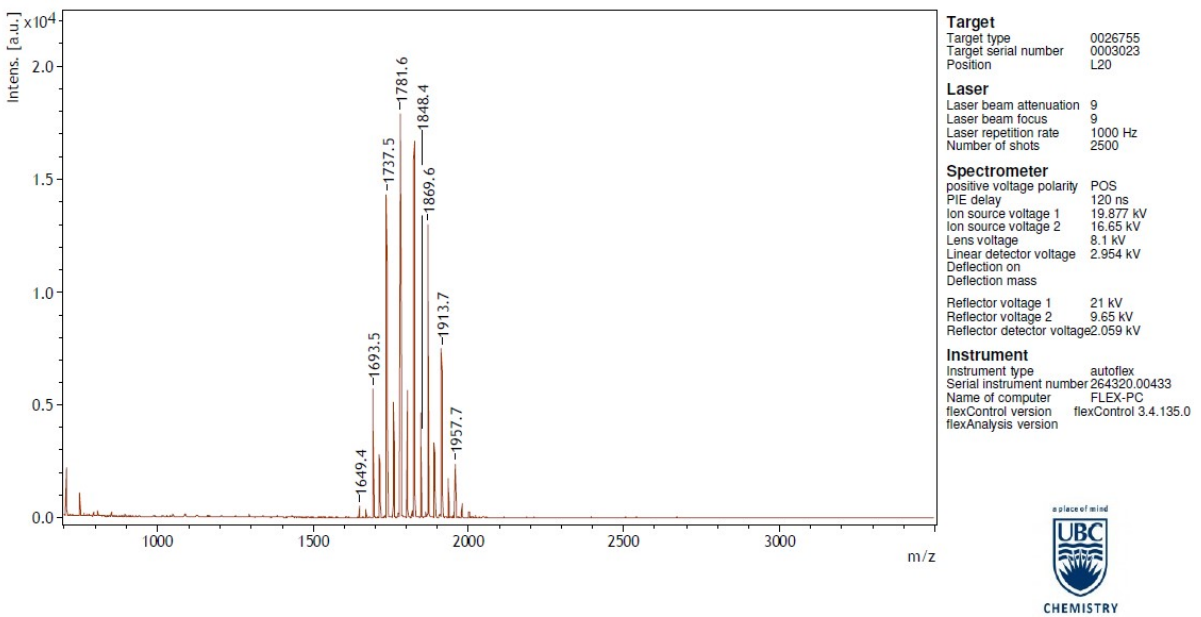

Figure 9: 46 MALDI

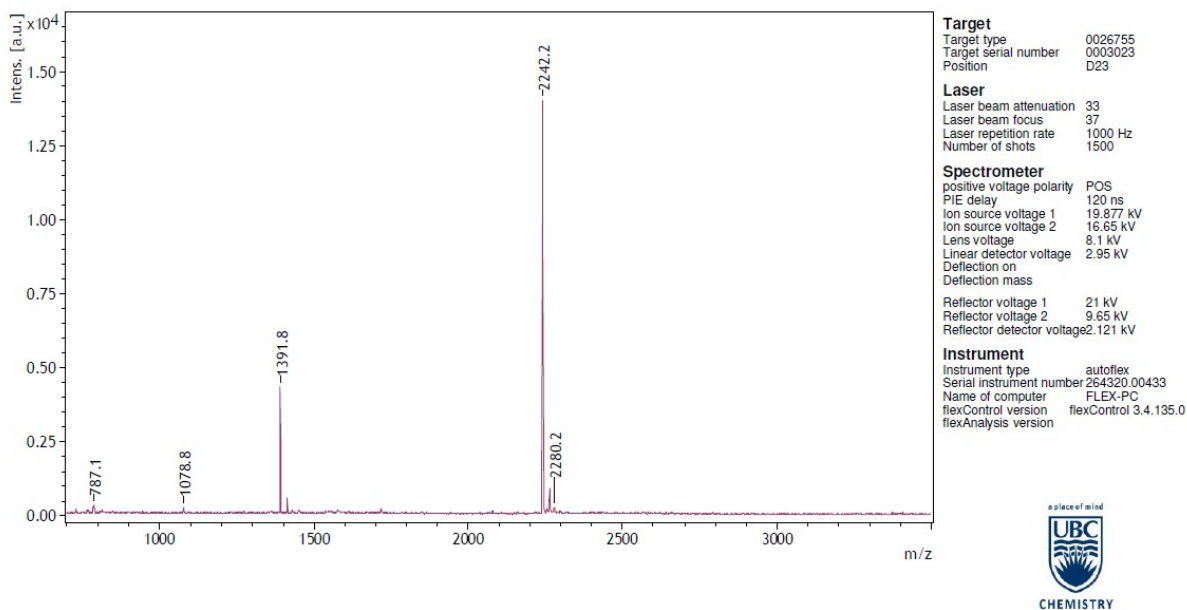

Figure 10: 47a MALDI

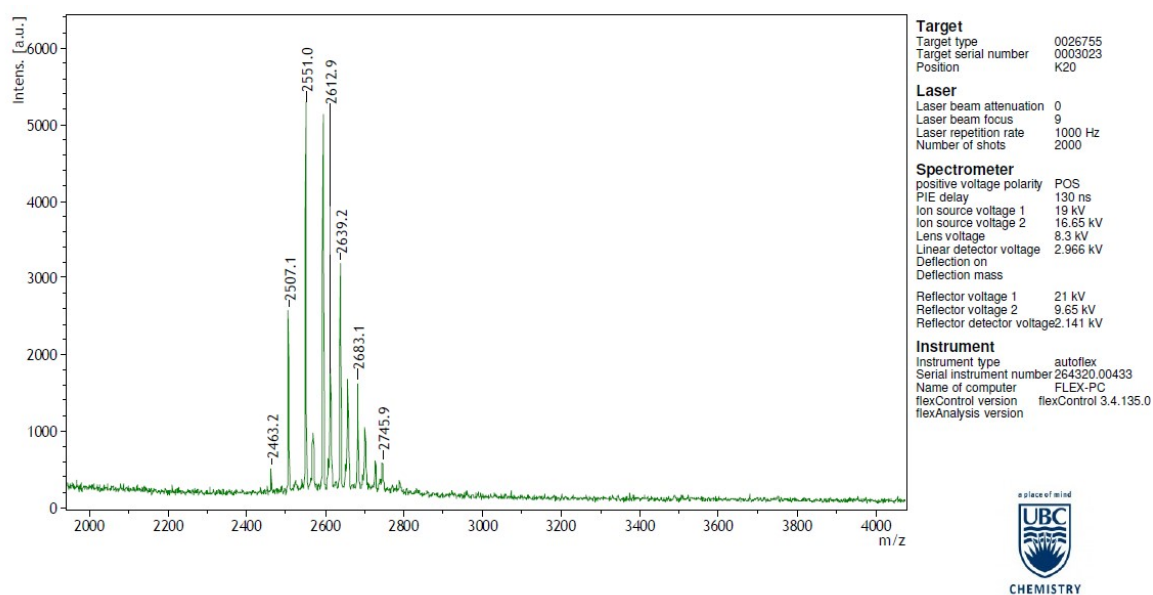

Figure 11: 48a MALDI

(E)-3-(3,4-dihydroxyphenyl)-N-((S)-1-(((R)-3-((2-(3,4-dihydroxyphenyl)-5,7-dihydroxy-4-oxo-4H-chromen-3-yl)oxy)-2-((5-(5-(((2-(2-(4-(hydroxymethyl)-1H-1,2,3-triazol-1-yl)ethoxy)polyethyleneglycolyl)amino)methyl)-1H-1,2,3-triazol-1-yl)pentyl)oxy)propyl)amino)-3-(4-hydroxyphenyl)-1-oxopropan-2-yl)acrylamide **49a**

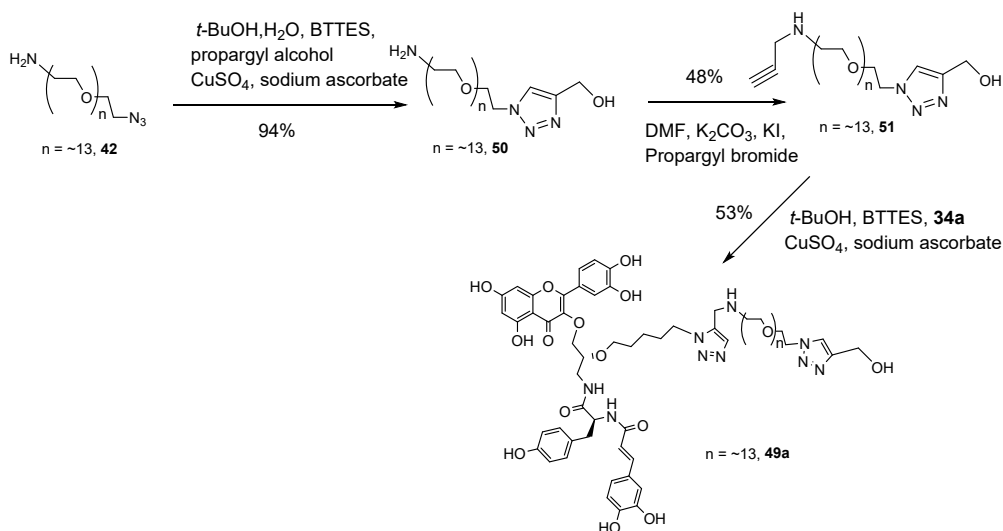

A suspension of **42** (80 mg, 0.13 mmol), propargyl alcohol (13  $\mu$ L, 0.22 mmol), and BTES ligand (6.5 mg, 13  $\mu$ mol) in *t*-BuOH (1.3 mL) and water (1.3 mL) was treated with  $\text{CuSO}_4 \cdot 5\text{H}_2\text{O}$  (0.133 M, 0.3 mL) and sodium ascorbate (0.066 M, 0.3 mL), and the mixture was stirred for 36 h at room temperature. The reaction mixture was evaporated and co-evaporated with toluene three times, the resulting residue was purified by flash column chromatography on silica gel (6:1, DCM:MeOH, with 1% 1M  $\text{NH}_4\text{OH}$ ) to afford **50** as an oil (82 mg, 0.12 mmol, 94%). A suspension of the solid (82 mg, 0.12 mmol), anhydrous  $\text{K}_2\text{CO}_3$  (51 mg, 0.37 mmol), KI (2 mg, 12  $\mu$ mol) and propargyl bromide (80% in toluene) (13  $\mu$ L, 0.12 mmol) in dry DMF (6mL) was stirred overnight in the dark under  $\text{N}_2$  at room temperature, and the reaction mixture was filtered through Celite and concentrated. The resulting residues were purified by flash column chromatography on silica gel (9:1 and 7:1, DCM:MeOH, with 1% 1M  $\text{NH}_4\text{OH}$ ) to afford the product as a foam (**51**, 27 mg, 38.1  $\mu$ mol, 32%) (48% based on the consumed starting material, 29 mg of starting material was recovered). A suspension of **51** (7 mg, 9.9  $\mu$ mol), **34a** (6 mg, 7.4  $\mu$ mol) and BTES (5 mg, 10.1  $\mu$ mol) in *t*-BuOH (2.4 mL) was treated with  $\text{CuSO}_4 \cdot 5\text{H}_2\text{O}$  (0.133 M, 0.6 mL) and sodium ascorbate (0.066 M, 0.6 mL), and the reaction mixture was stirred overnight at room temperature. The product was precipitated out on the wall of flask, solution was poured out and washed with MeOH and water respectively. The precipitate was dissolved in minimum amount of DMSO, and diluted with water, lyophilized to afford the product **49a** a yellow solid (5.91 mg, 3.9  $\mu$ mol, 53%).

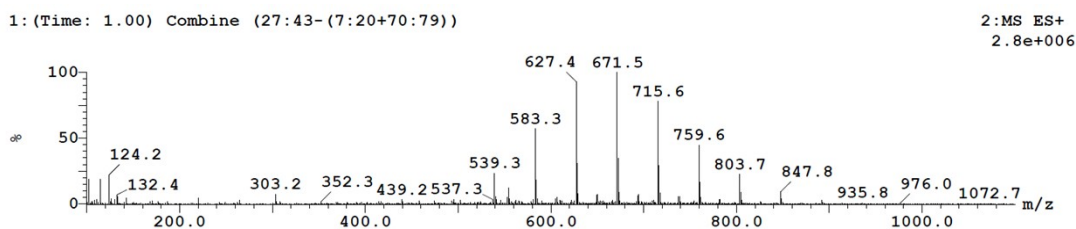

Figure 12: **50** ESI-MS



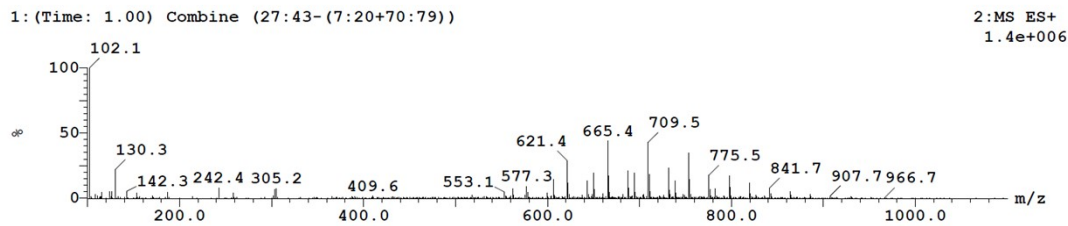

Figure 13: 51 ESI-MS

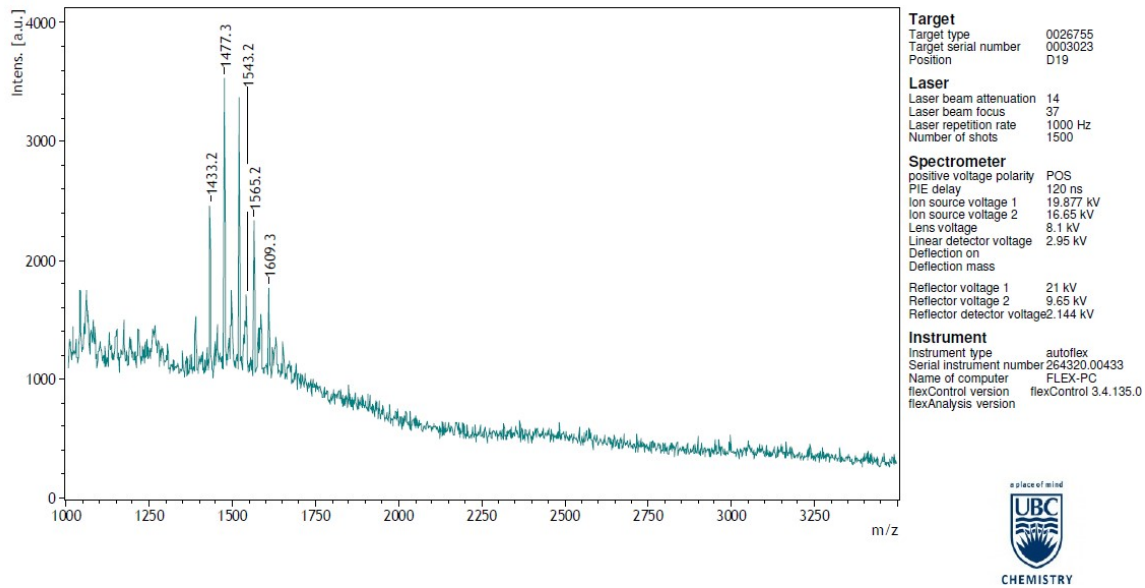

Figure 14: 49a MALDI

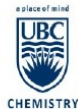

NMR Data

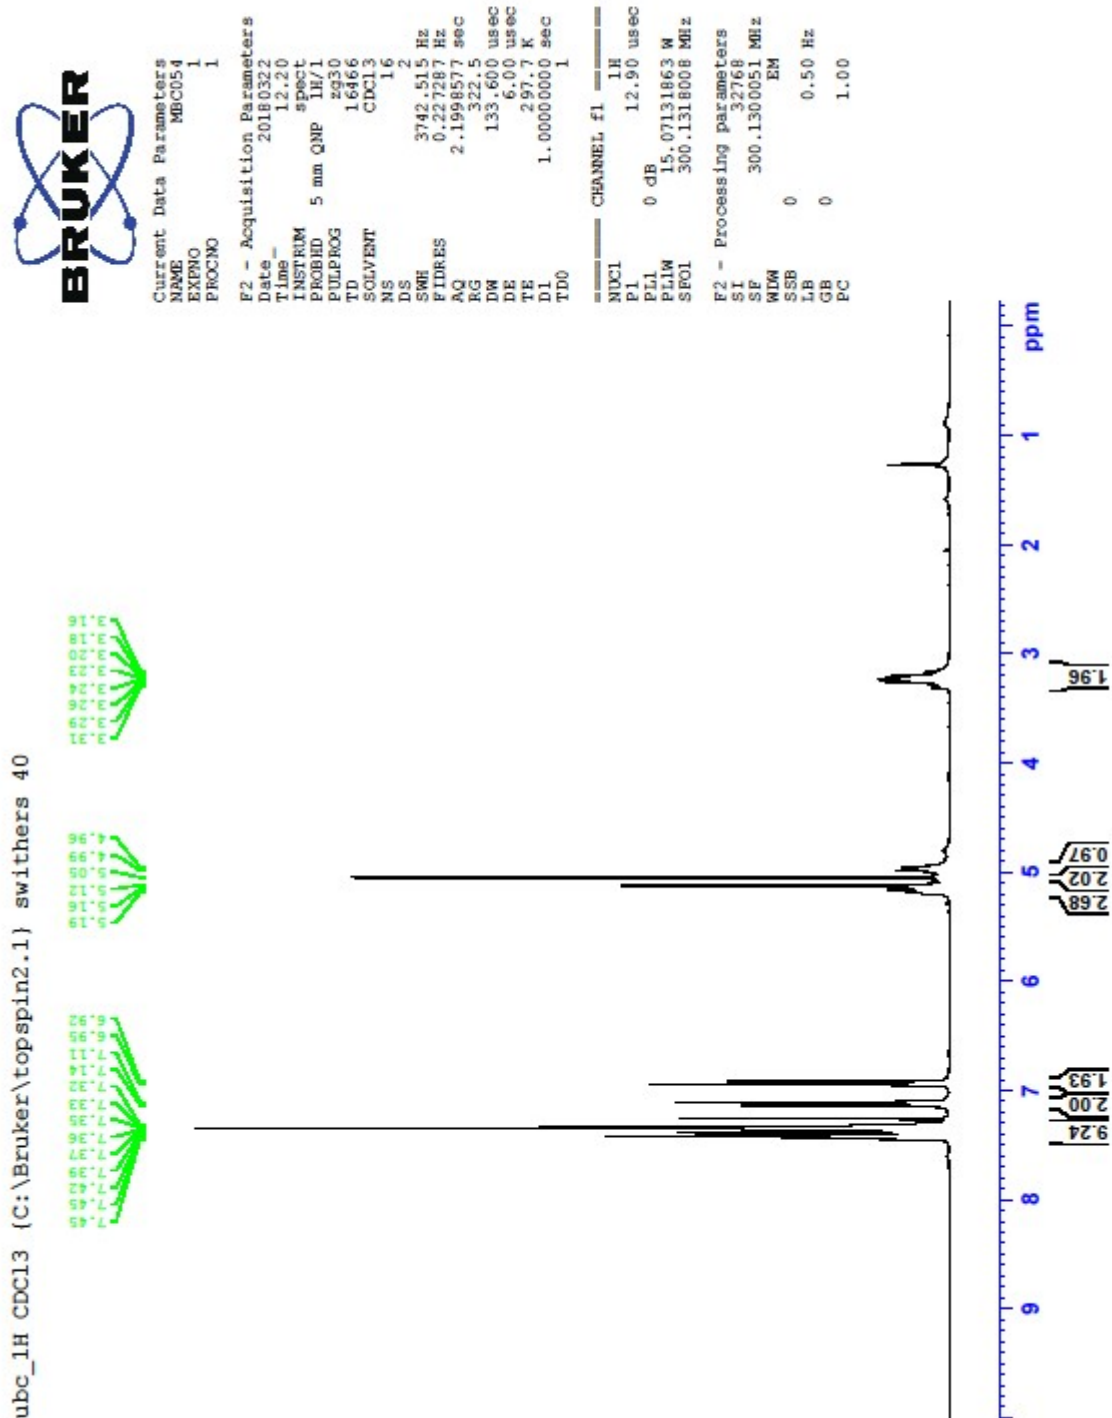

Figure 4: <sup>1</sup>H NMR (3)

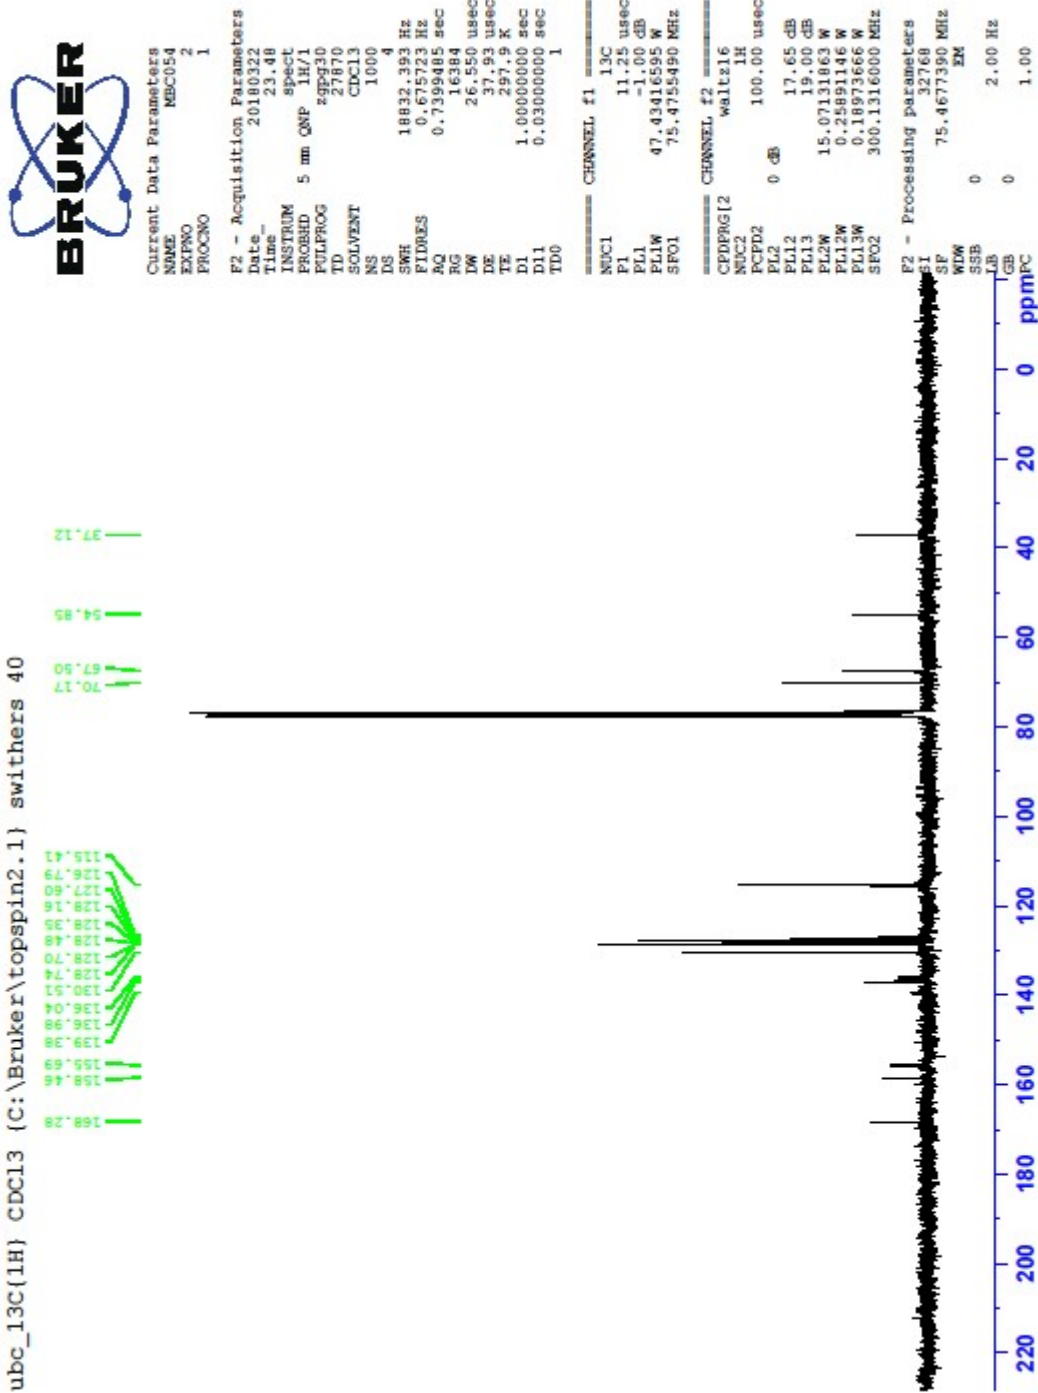

Figure 5: <sup>13</sup>C NMR (3)

ubc\_1H\_CDCl3 (C:\Bruker\topspin2.1) swithers 7

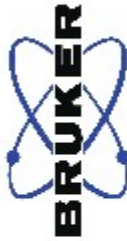

```

Current Data Parameters
NAME      MBC055
EXPNO     1
PROCNO    1

F2 - Acquisition Parameters
Date_     20180321
Time      10.41
INSTRUM   spect
PROBHD    5 mm QNP 1H/1
PULPROG   zg30
TD         16466
SOLVENT   CDCl3
NS         16
DS         2
SWE        3742.515 Hz
FIDRES     0.227287 Hz
AQ          2.1998577 sec
RG          322.5
DM          133.600 usec
DE          6.00 usec
TE          297.9 K
D1          1.00000000 sec
TD0         1

===== CHANNEL f1 =====
NUC1       1H
P1         12.90 usec
PL1        0 dB
PL1W       15.07131863 W
SFO1       300.1318008 MHz

F2 - Processing parameters
SI         32768
SF         300.1300052 MHz
WDW         EM
SSB         0
LB         0.50 Hz
GB         0
PC         1.00
  
```

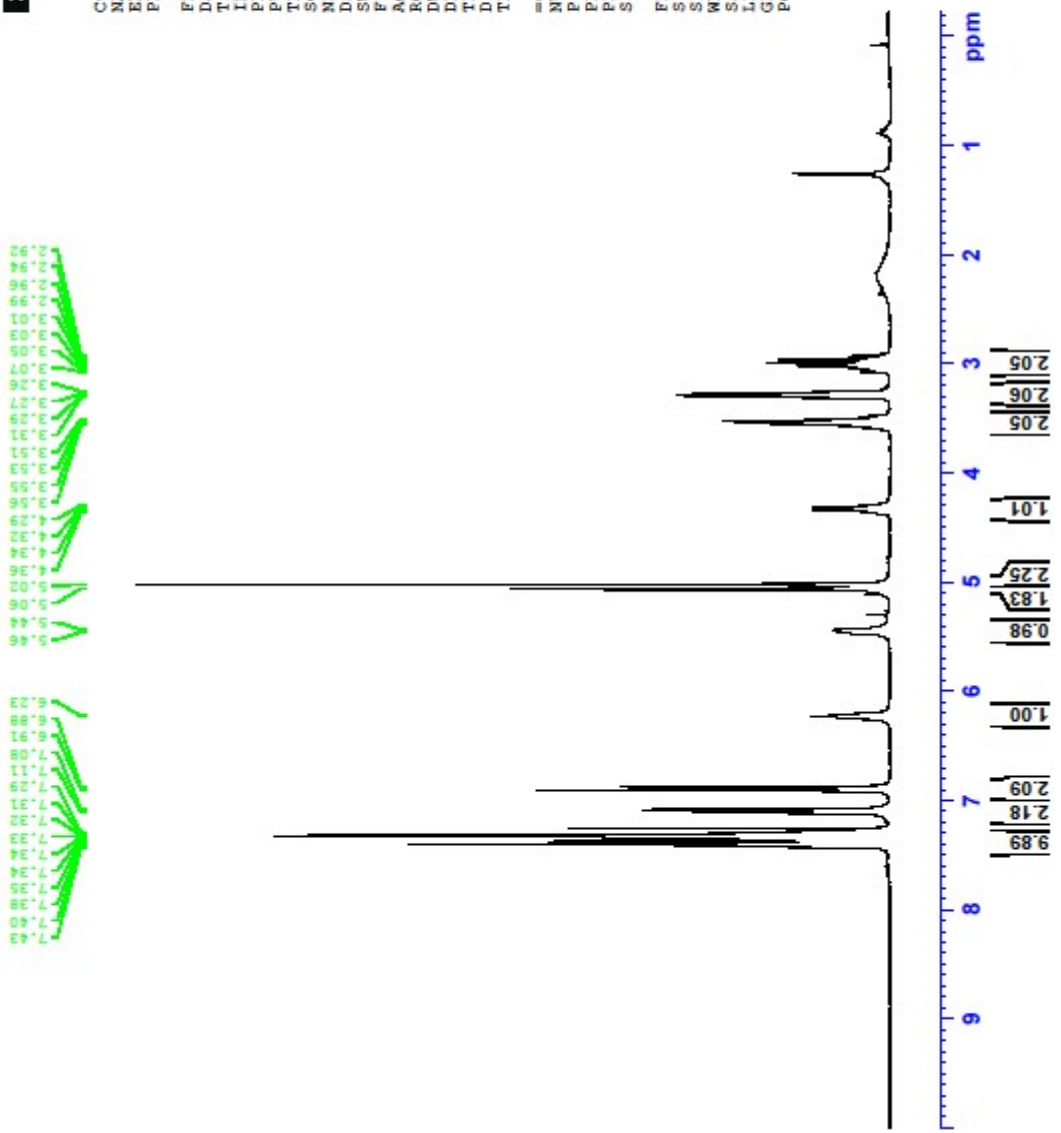

Figure 6: <sup>1</sup>H NMR (4)

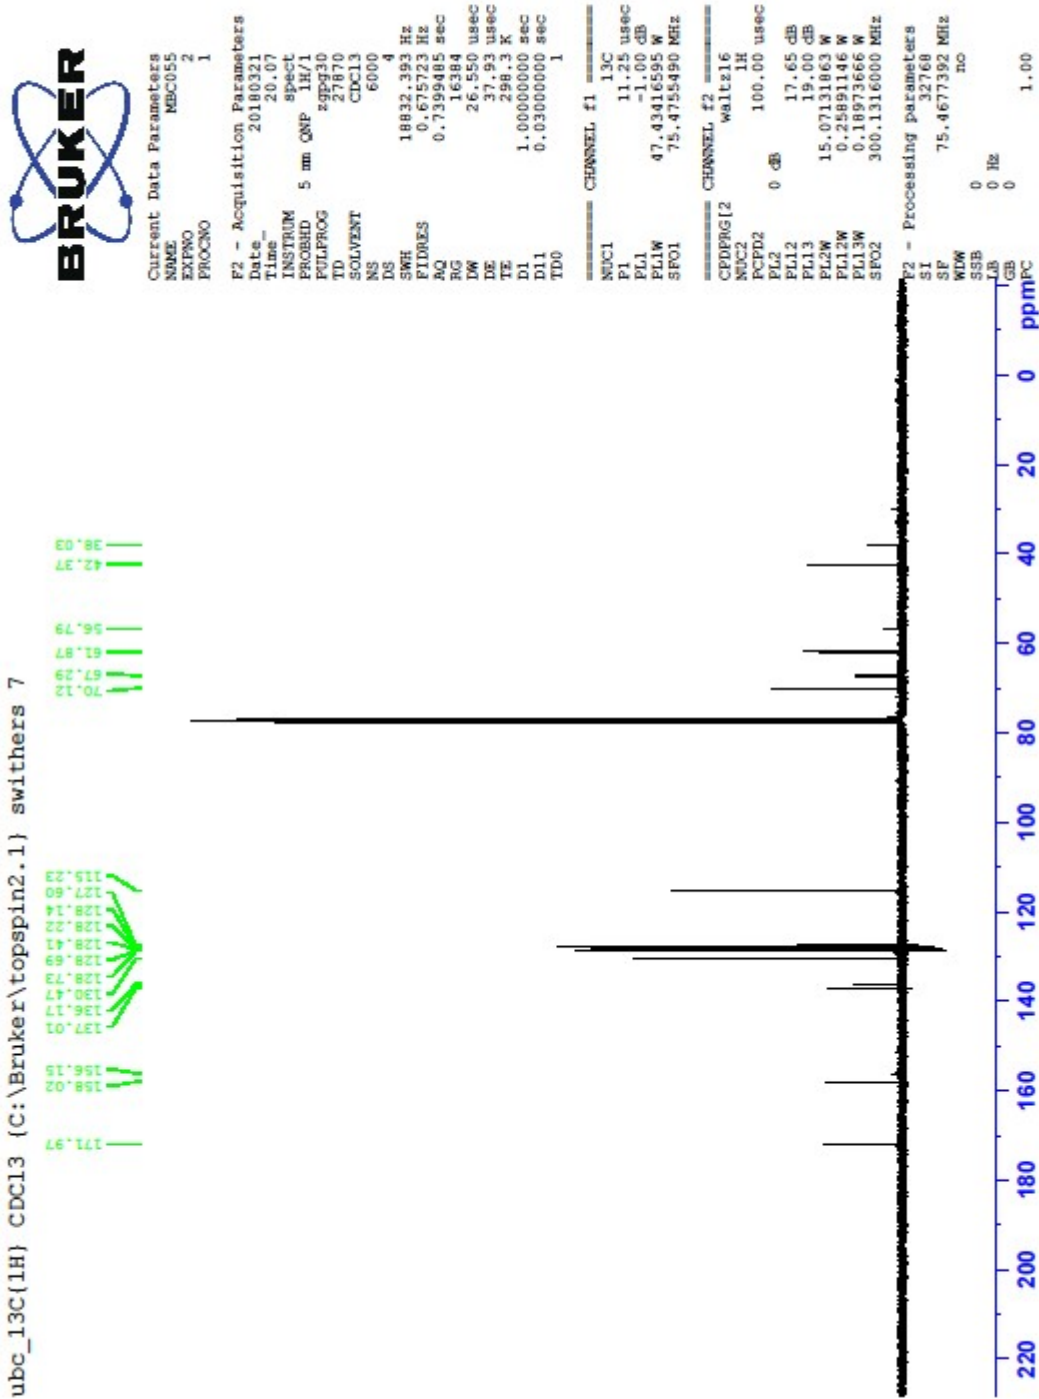

Figure 7:  $^{13}\text{C}$  NMR (4)

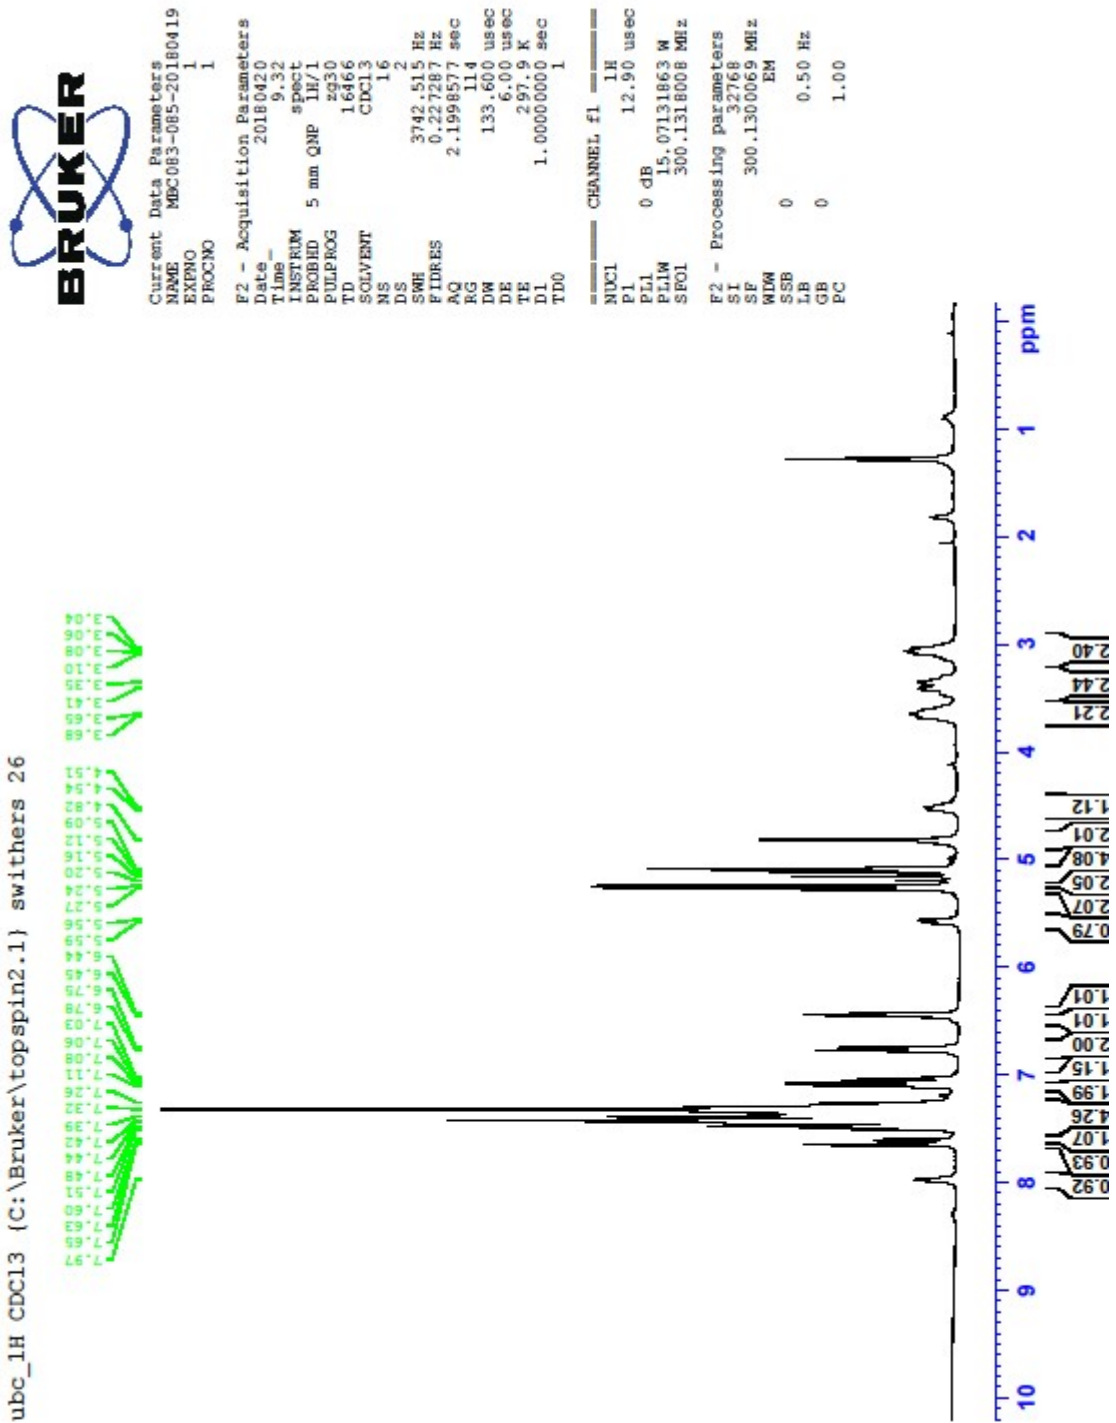

Figure 8: <sup>1</sup>H NMR (8)



ubc\_1H MeOD (C:\Bruker\topspin2.1) swithers 20

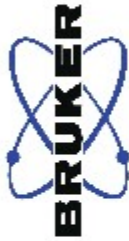

Current Data Parameters  
NAME MBCD91  
EXPNO 1  
PROCNO 1

F2 - Acquisition Parameters  
Date\_ 20180427  
Time 12.34  
INSTRUM spect  
PROBHD 5 mm QNP 1H/1  
PULPROG zgpg30  
TD 16466  
SOLVENT MeOD  
NS 16  
DS 2  
SWH 3742.515 Hz  
FIDRES 0.227287 Hz  
AQ 2.1998577 sec  
RG 322.5  
DW 133.600 usec  
DE 6.00 usec  
TE 297.9 K  
D1 1.00000000 sec  
TDO 1

===== CHANNEL f1 =====  
NUC1 1H  
P1 12.90 usec  
PL1 0 dB  
PLW 15.07131863 W  
SFO1 300.1318008 MHz

F2 - Processing parameters  
SI 32768  
SF 300.1300077 MHz  
WDW EM  
SSB 0  
LB 0.50 Hz  
GB 0  
PC 1.00

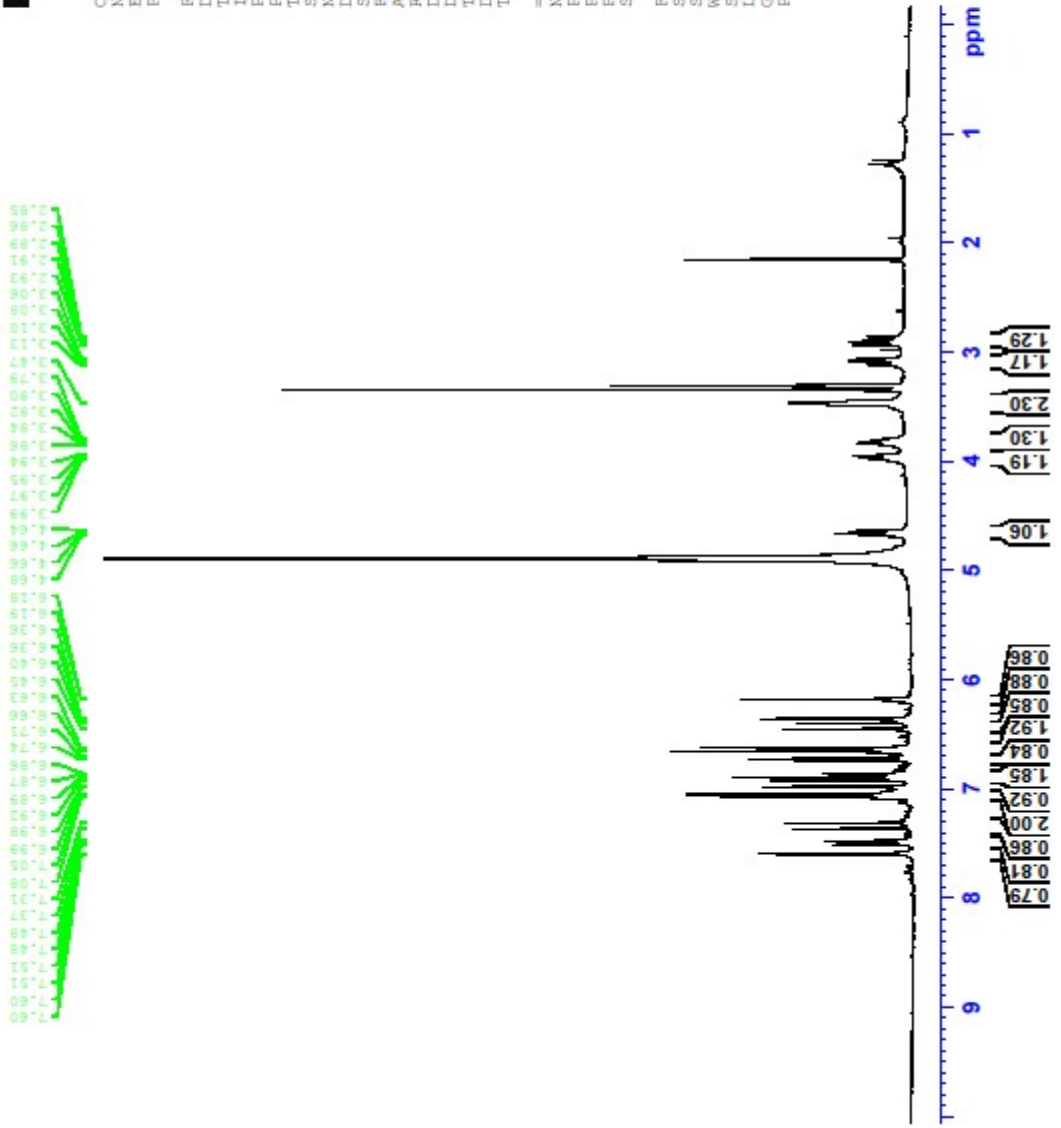

Figure 10: <sup>1</sup>H NMR (13)



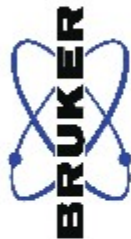

ubc\_13C(1H) MeOD (C:\Bruker\topspin2.1) swithers 20

179.71  
174.02  
169.19  
166.00  
161.96  
158.42  
158.16  
157.20  
150.02  
148.80  
146.58  
146.15  
142.96  
138.28  
131.23  
129.18  
128.22  
122.94  
122.43  
122.27  
117.90  
116.54  
116.37  
116.20  
115.27  
106.80  
99.89  
94.78  
71.70  
57.05  
47.11  
38.77  
27.11

Current Data Parameters  
 NAME MBC091  
 EXPNO 2  
 PROCNO 1

F2 - Acquisition Parameters  
 Date\_ 20180427  
 Time 15.44  
 INSTRUM spect  
 PROBHD 5 mm QNP 1H/1  
 PULPROG zgpg30  
 TD 27870  
 SOLVENT MeOD  
 NS 6000  
 DS 4  
 SWH 18832.393 Hz  
 FIDRES 0.675723 Hz  
 AQ 0.7399405 sec  
 RG 16384  
 DW 26.550 usec  
 DE 37.93 usec  
 TE 298.3 K  
 D1 1.00000000 sec  
 D11 0.03000000 sec  
 TDO 1

CHANNEL f1  
 NSC1 13C  
 P1 11.25 usec  
 PL1 -1.00 dB  
 PL1W 47.43416595 W  
 SFO1 75.4755490 MHz

CHANNEL f2  
 CPDPRG2 waltz16  
 NSC2 1H  
 PCPD2 100.00 usec  
 PL2 0 dB  
 PL2 17.65 dB  
 PL3 15.00 dB  
 PL2W 15.07131863 W  
 PL12W 0.25891146 W  
 PL13W 0.18973666 W  
 SFO2 300.1316000 MHz

F2 - Processing parameters  
 SI 32768  
 SF 75.4676441 MHz  
 WDW EM  
 SSB 0  
 LB 0  
 GB 0  
 PC 2.00 Hz  
 MC 1.00

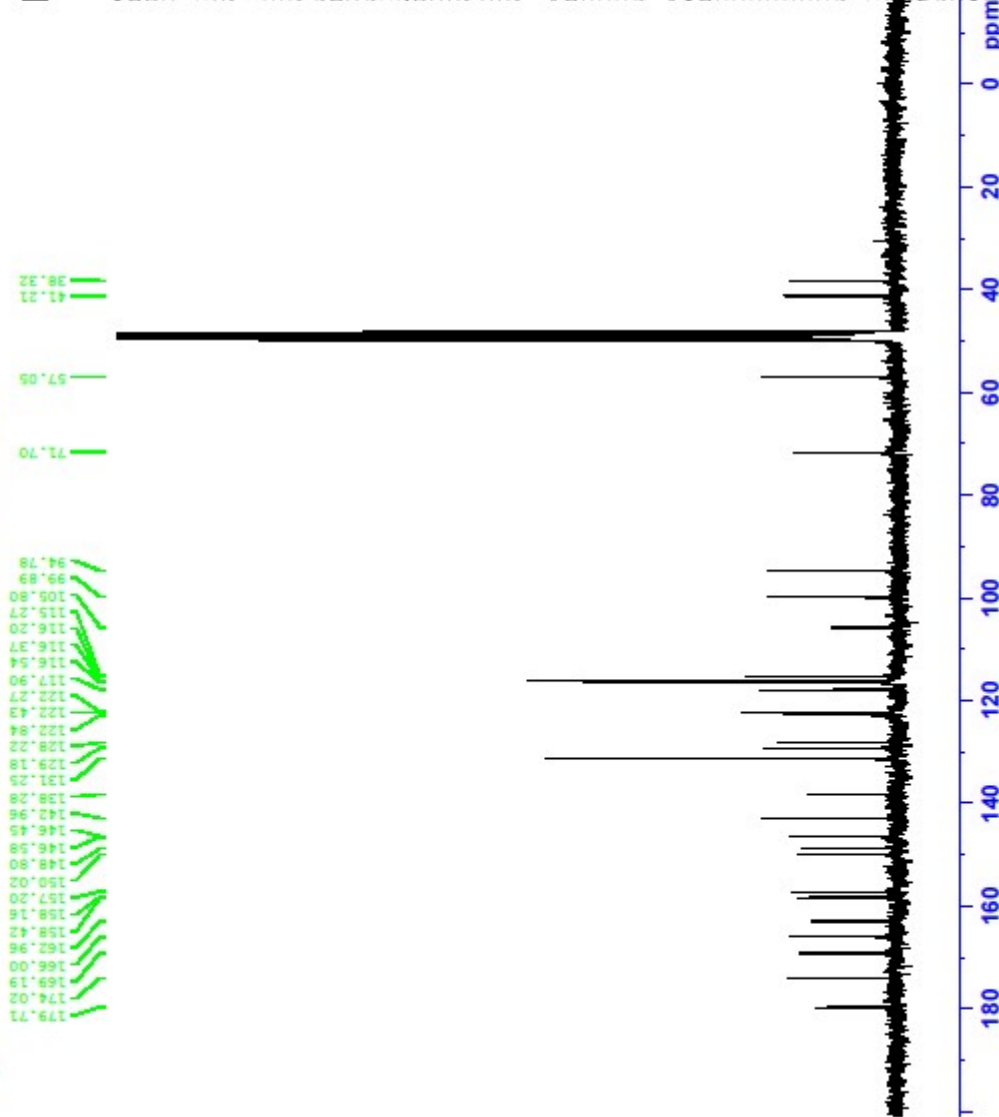

Figure 11: <sup>13</sup>C NMR (13)

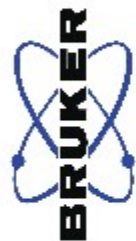

ubc\_1H\_CDCl3 (C:\Bruker\topspin2.1) swithers 30

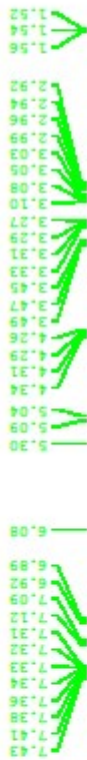

Current Data Parameters  
NAME DHG  
EXPNO 1  
PROCNO 1

F2 - Acquisition Parameters  
Date\_ 20180718  
Time\_ 8.37  
INSTRUM spect  
PROBHD 5 mm QNP 1H/1  
PULPROG zg30  
TD 16466  
SOLVENT CDCl3  
NS 16  
DS 2  
SWE 3742.515 Hz  
FIDRES 0.227287 Hz  
AQ 2.1998577 sec  
RG 645.1  
DM 133.600 usec  
DE 6.00 usec  
TE 297.7 K  
D1 1.00000000 sec  
TD0 1

CHANNEL f1  
NUC1 1H  
P1 12.80 usec  
PL 0 dB  
PLW 15.07131863 W  
SFO1 300.1318008 MHz

F2 - Processing parameters  
SI 32768  
SF 300.1300054 MHz  
WDW EM  
SSB 0  
LB 0.50 Hz  
GB 0  
PC 1.00

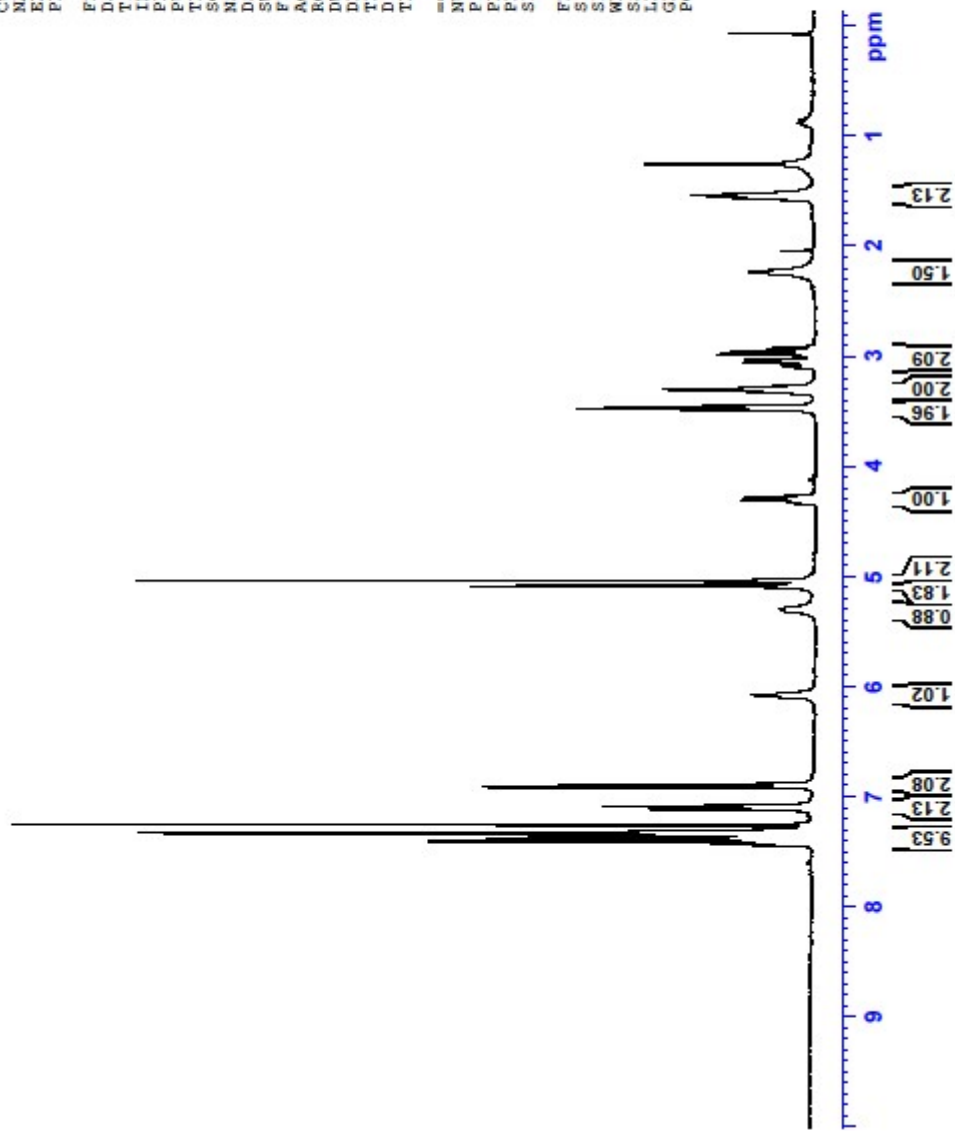

Figure 12: <sup>1</sup>H NMR (6)

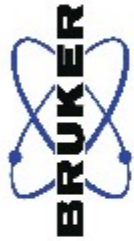

ubc\_13c(1h) CDC13 (C:\Bruker\topspin2.1) swithers 1

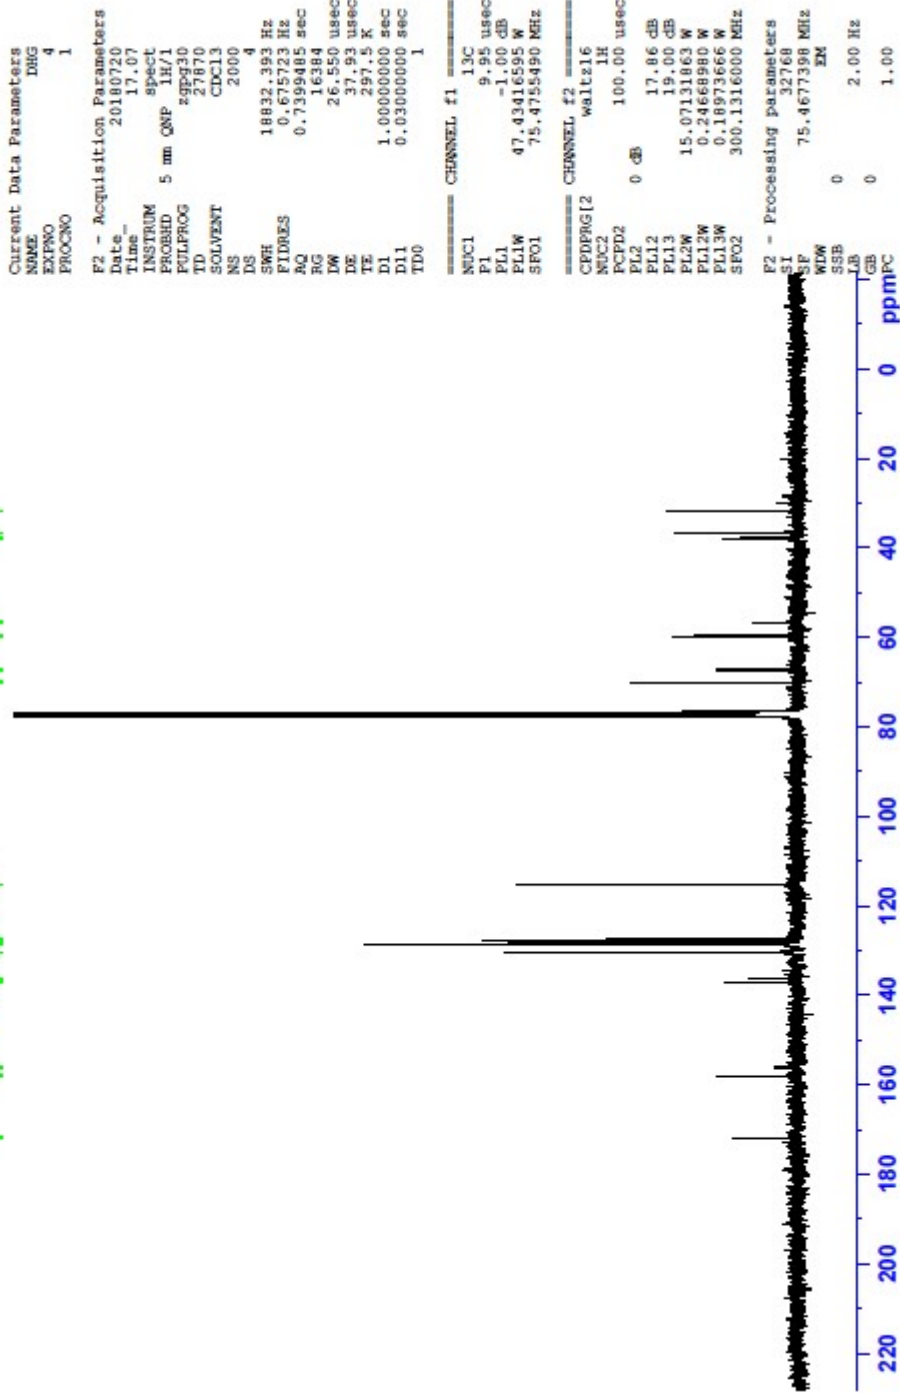

Figure 13: <sup>13</sup>C NMR (6)

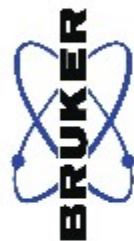

Current Data Parameters  
 NAME DELIMPUREZ4  
 EXPNO 1  
 PROCNO 1

F2 - Acquisition Parameters  
 Date\_ 20180825  
 Time\_ 4.36  
 INSTRUM spect  
 PROBHD 5 mm QNP 1H/1  
 PULPROG zg30  
 TD 16466  
 SOLVENT CDCl3  
 NS 16  
 DS 2  
 SWE 3742.515 Hz  
 FIDRES 0.227287 Hz  
 AQ 2.1998577 sec  
 RG 114  
 DW 133.600 usec  
 DE 6.00 usec  
 TE 298.3 K  
 D1 1.00000000 sec  
 TDO 1

CHANNEL f1  
 NUC1 1H  
 P1 12.80 usec  
 PL1 0 dB  
 PL1W 15.07131863 W  
 SFO1 300.1318008 MHz

F2 - Processing parameters  
 SI 32768  
 SF 300.1300069 MHz  
 WDW EM  
 SSB 0  
 LB 0.50 Hz  
 GB 0  
 PC 1.00

ubc\_1H\_CDCl3 (C:\Bruker\topspin2.1) swithers 3

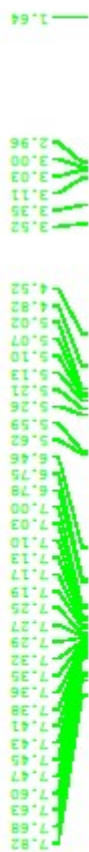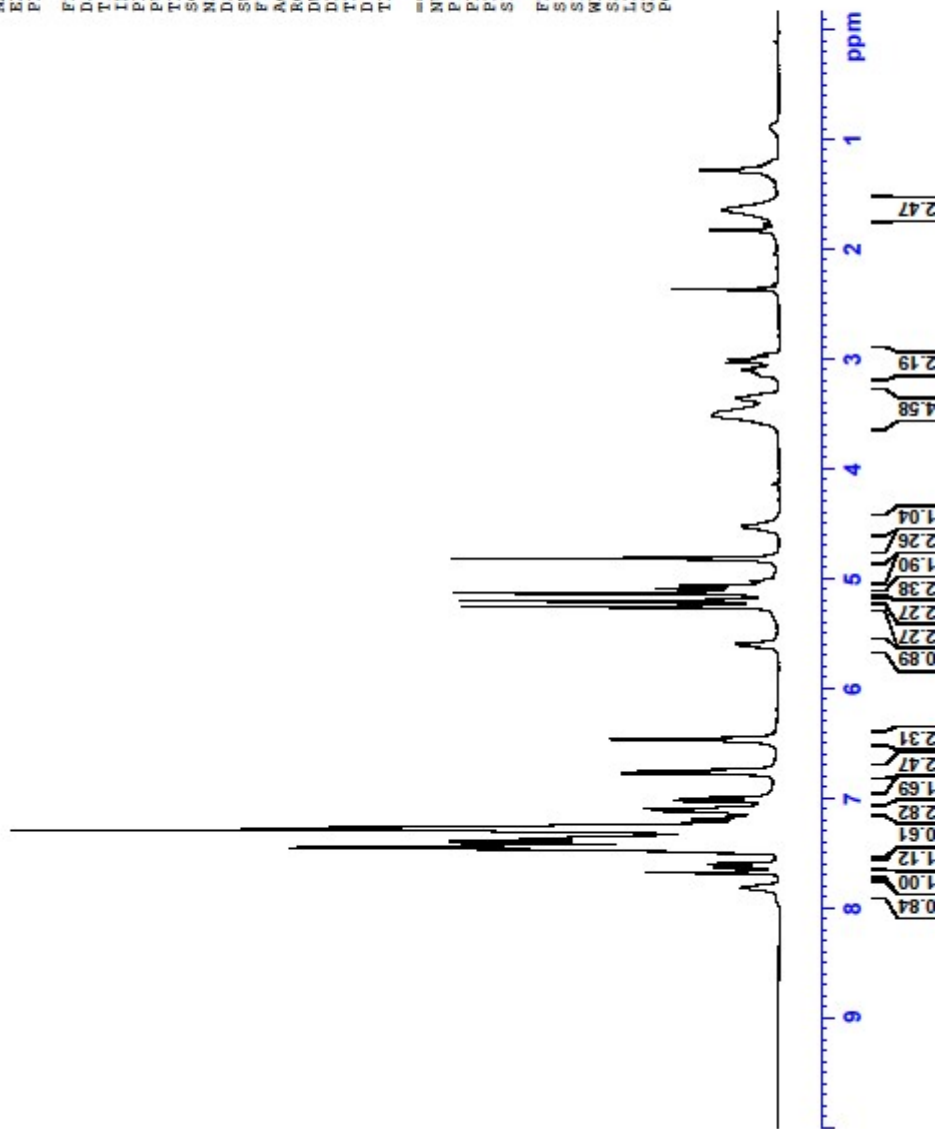

Figure 14: <sup>1</sup>H NMR (9)



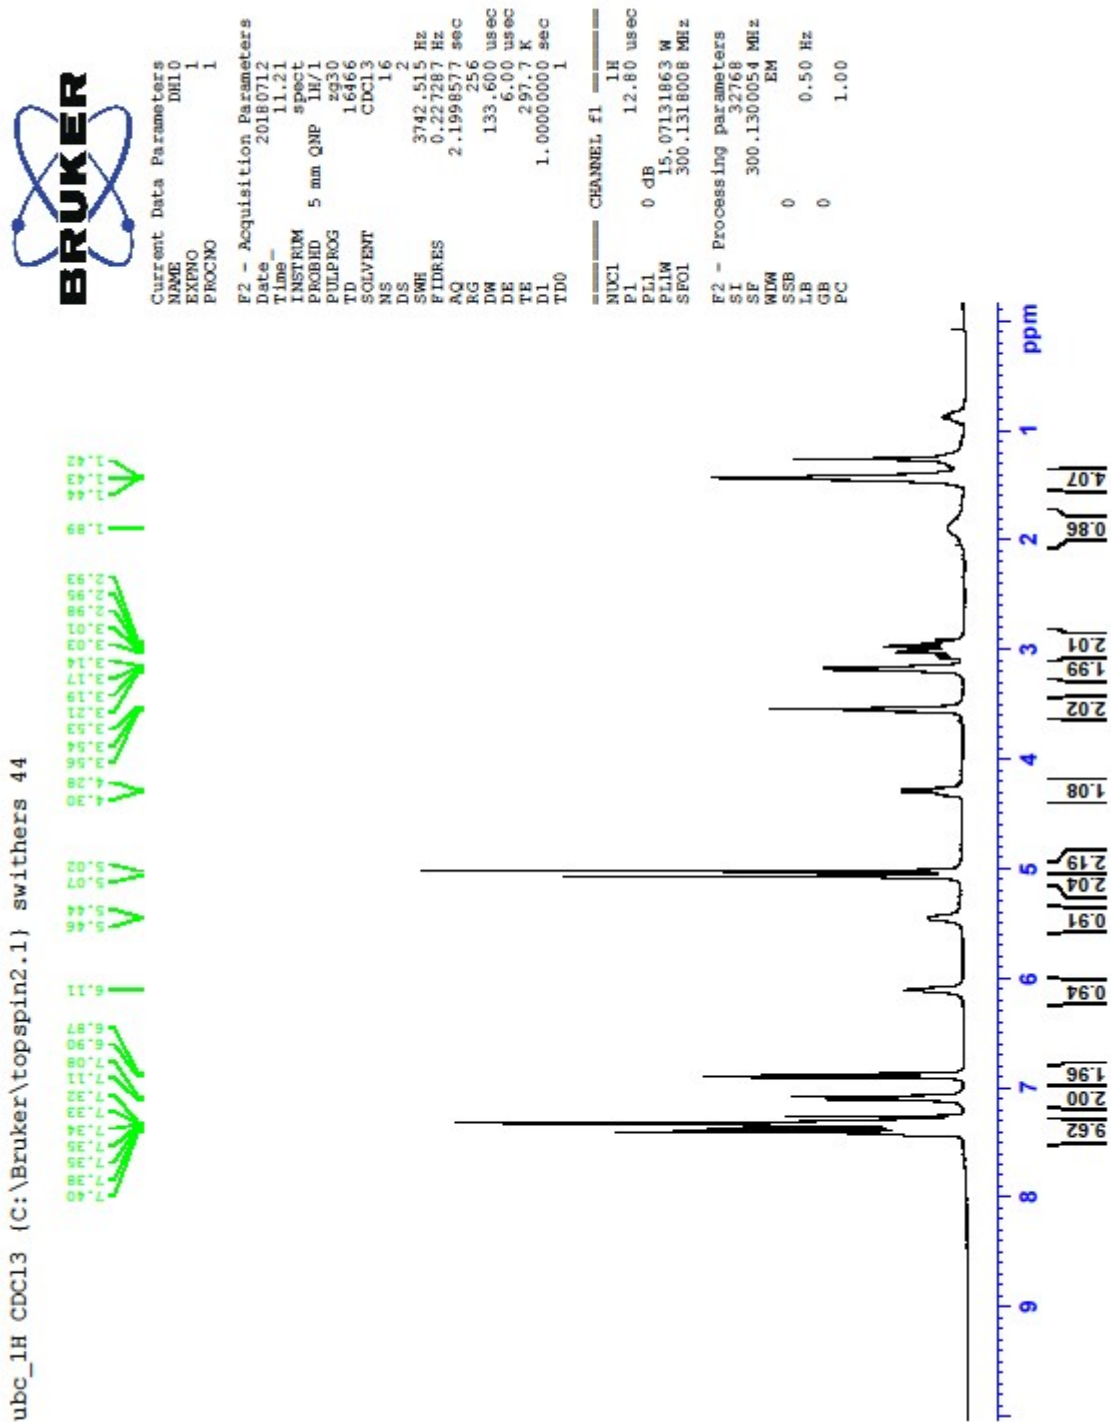

Figure 16: <sup>1</sup>H NMR (6)

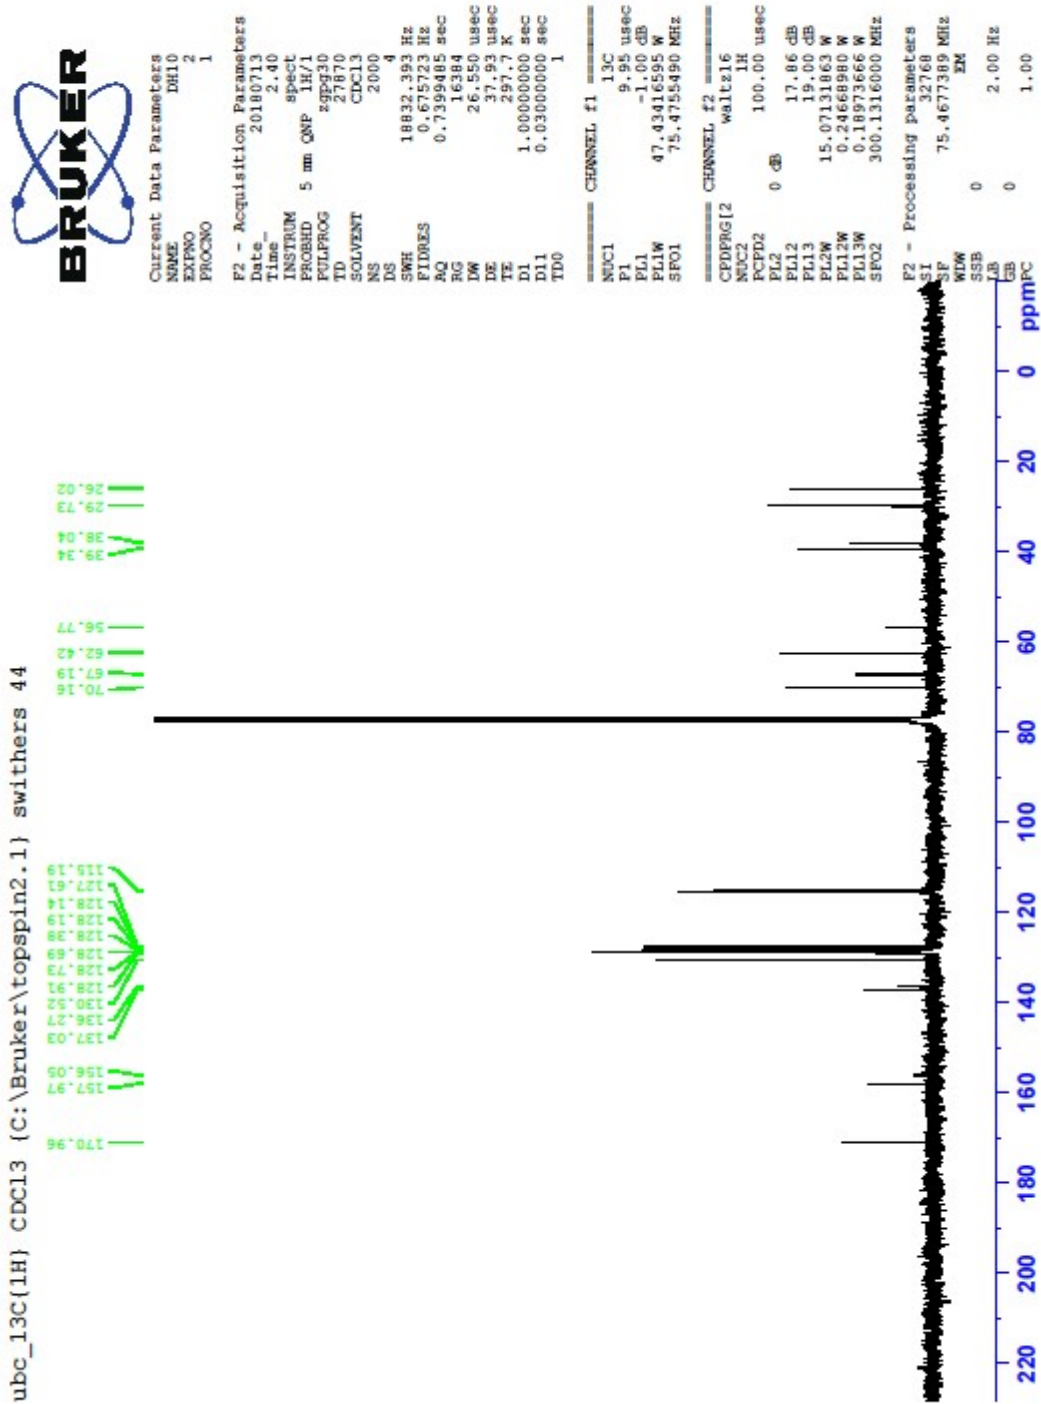

Figure 17: <sup>13</sup>C NMR (6)

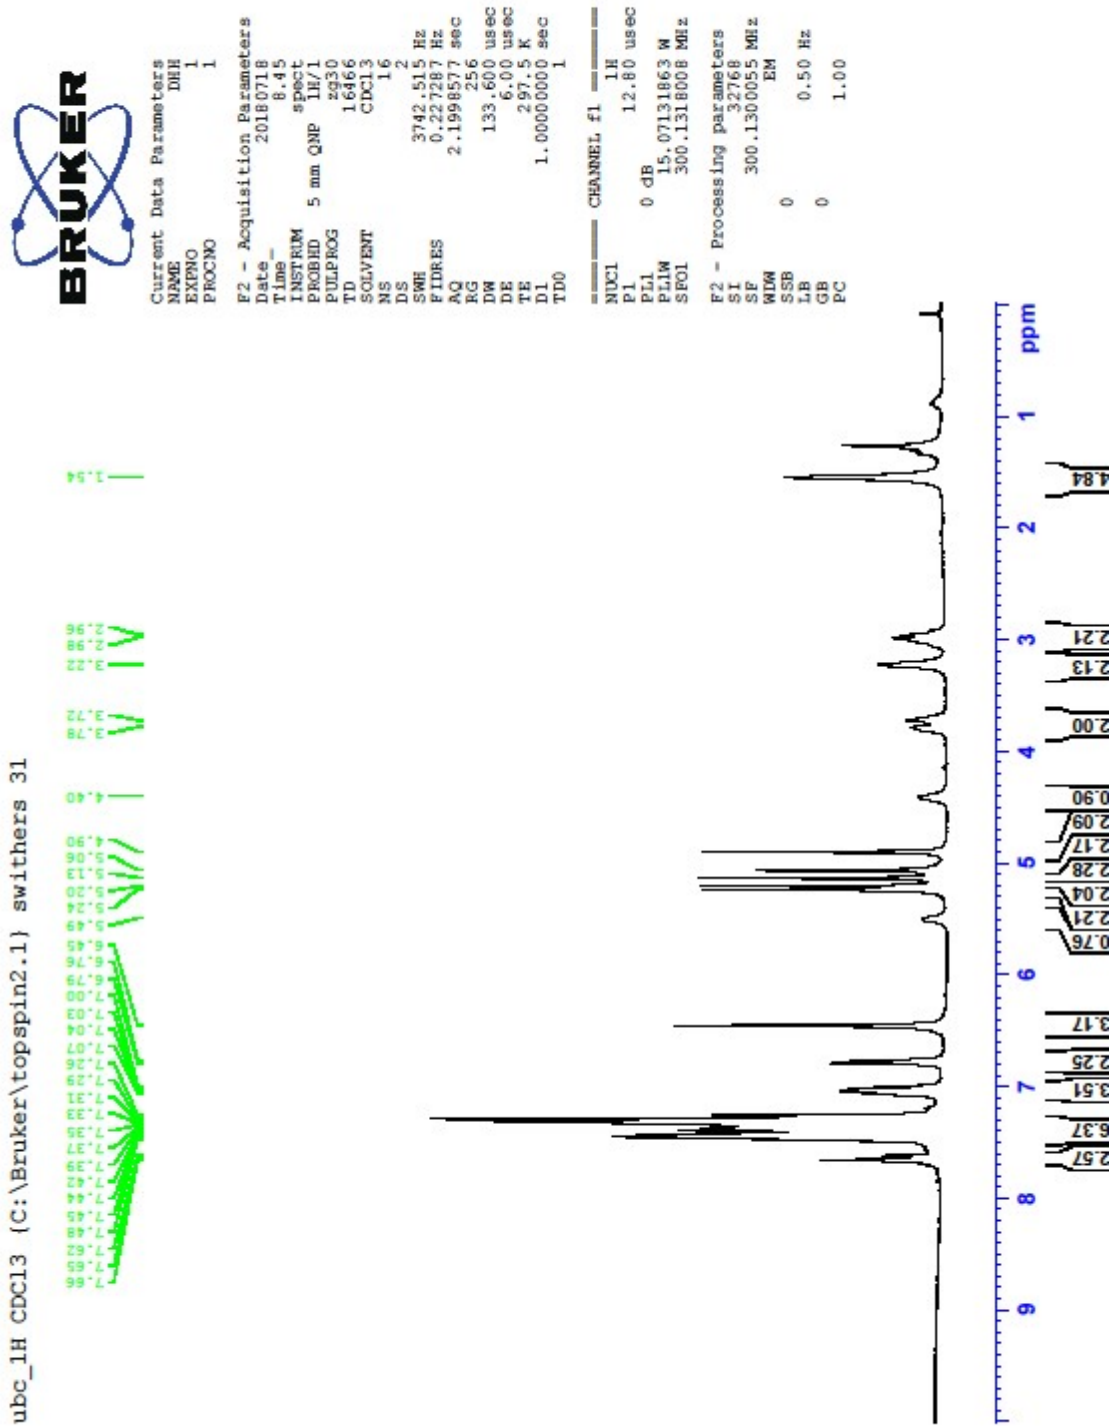

Figure 18: <sup>1</sup>H NMR (10)



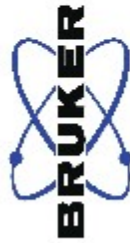

ubc\_13c[1H] CDCl3 (C:\Bruker\topspin2.1) swithers 31

178.94  
171.02  
164.67  
162.10  
157.84  
156.77  
156.18  
151.59  
148.45  
138.27  
137.04  
136.99  
136.63  
136.40  
135.86  
130.54  
128.89  
128.77  
128.74  
128.60  
128.53  
128.12  
127.99  
127.60  
127.49  
127.41  
127.33  
123.33  
123.02  
118.39  
114.59  
112.82  
108.23  
98.81  
93.22  
72.55  
70.98  
70.66  
71.65  
69.94  
69.94  
67.67  
60.00  
56.51  
38.39  
27.96  
25.89

```

Current Data Parameters
NAME_          DMR
EXPNO          2
PROCNO         1

F2 - Acquisition Parameters
Date_          20180718
Time           17.45
INSTRUM       spect
PROBHD        5 mm QNP 1H/1
PULPROG       zgpg30
TD             27870
SOLVENT       CDCl3
NS             2000
DS             4
SWH           18832.393 Hz
FIDRES        0.67573 Hz
AQ            0.7395405 sec
RG            16384
DQ            26.550 usec
DE            37.93 usec
TE            297.7 K
D1            1.00000000 sec
D11           0.03000000 sec
TD0           1

===== CHANNEL f1 =====
NUC1          13C
P1            9.95 usec
PL1           -1.00 dB
PL1W          47.43416595 W
SFO1          75.4755490 MHz

===== CHANNEL f2 =====
CPDPRG2       waltz16
NUC2          1H
PCPD2         100.00 usec
RG2           0 dB
PL2           17.06 dB
PL3           19.00 dB
PLZ          15.07131863 W
PL2W          0.24668980 W
PL1W          0.18973666 W
SFO2          300.1316000 MHz

F2 - Processing parameters
SI            32768
SF            75.4677401 MHz
WDW           EM
SSB           0
GB            0
PC            2.00 Hz
=====
  
```

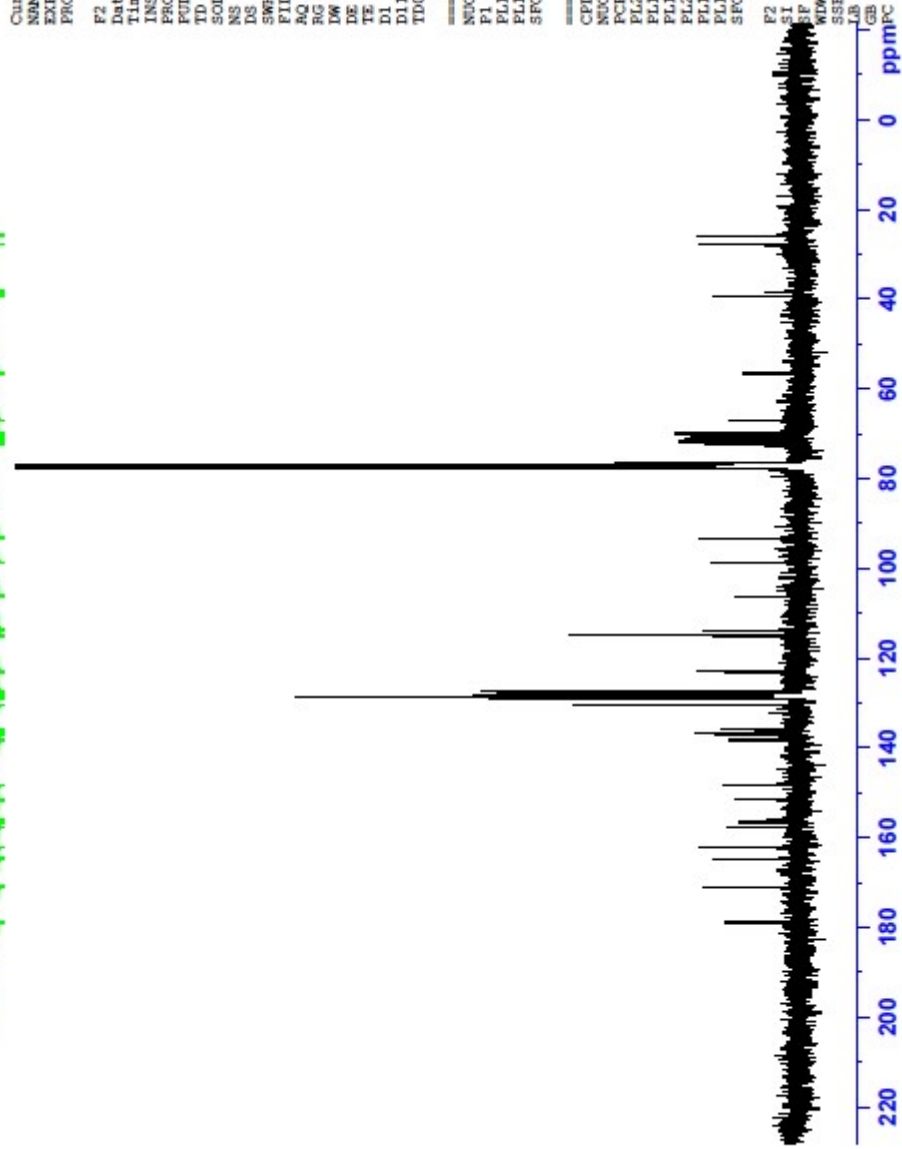

Figure 19: <sup>13</sup>C NMR (10)

ubc\_1H MeOD (C:\Bruker\topspin2.1) swithers 2

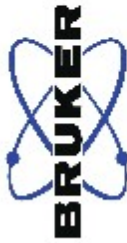

```

Current Data Parameters
NAME          DHK9B
EXPNO         1
PROCNO        1

F2 - Acquisition Parameters
Date_         20180810
Time          4.59
INSTRUM       spect
PROBHD        5 mm QNP 1H/1
PULPROG       zg30
TD            16466
SOLVENT       MeOD
NS            16
DS            2
SWH           3742.515 Hz
FIDRES        0.227287 Hz
AQ            2.1998577 sec
RG            256
DM            133.600 usec
DE            6.00 usec
TE            297.7 K
D1            1.0000000 sec
TD0           1

===== CHANNEL f1 =====
NUC1          1H
P1            12.80 usec
PL1           0 dB
PL1M          15.07131863 W
SFO1          300.1318008 MHz

F2 - Processing parameters
SI            32768
SF            300.1300077 MHz
WDW           EM
SSB           0
LB            0.50 Hz
GB            0
PC            1.00
  
```

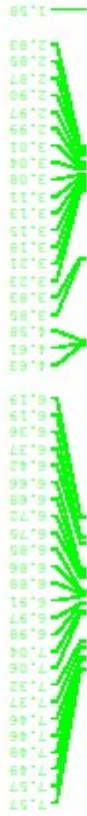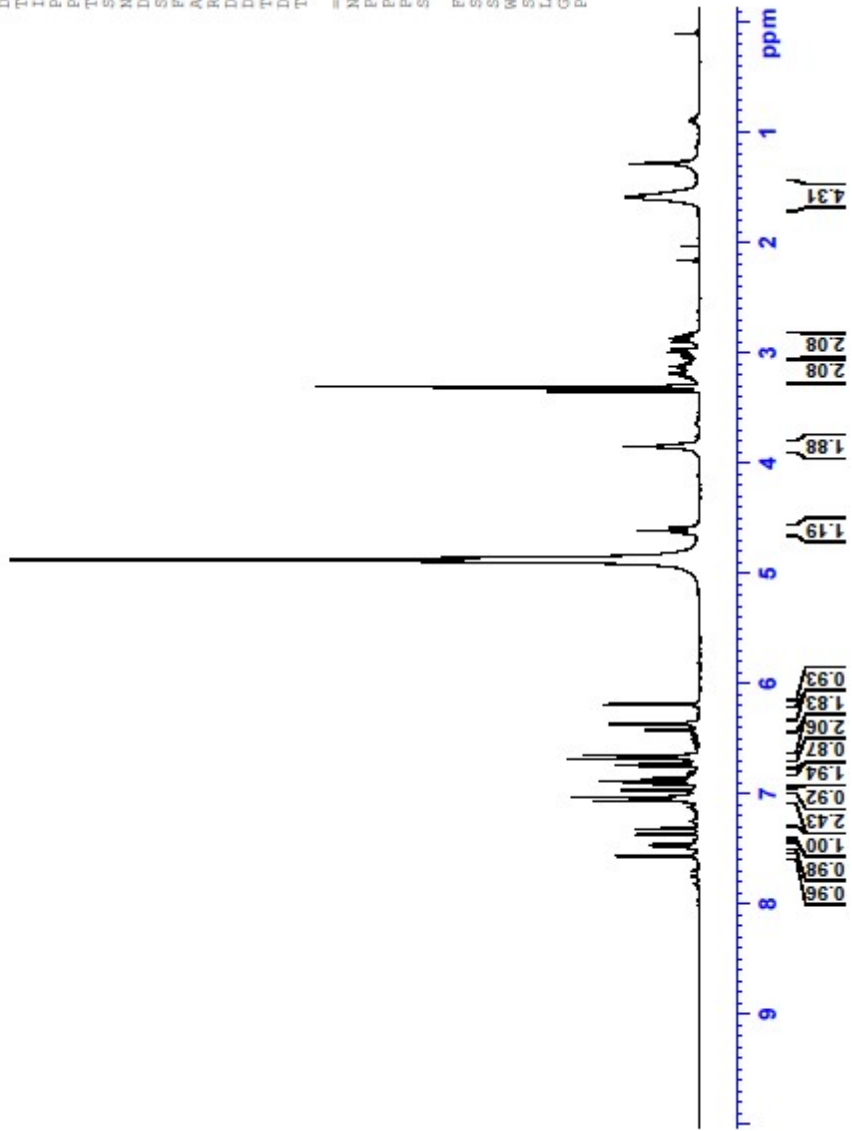

Figure 20: <sup>1</sup>H NMR (14)

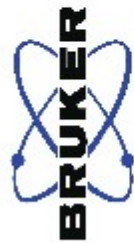

ubc\_13C[1H] MeOD (C:\Bruker\topspin2.1) swithers 2

180.08  
173.68  
168.91  
165.94  
163.09  
158.43  
158.35  
157.26  
149.91  
146.94  
146.66  
146.30  
147.68  
138.63  
131.32  
129.05  
128.21  
123.09  
122.68  
122.25  
117.90  
116.72  
116.41  
116.35  
116.22  
106.93  
99.72  
94.69  
73.41  
56.81  
40.00  
38.59  
28.24  
28.70

Current Data Parameters  
NAME DHEK98  
EXPRO 2  
PROCNO 1

F2 - Acquisition Parameters  
Date\_ 20180810  
Time 17.04  
INSTRUM spect  
PROBHD 5 mm QNP 1H/1  
PULPROG zgpg30  
TD 27870  
SOLVENT MeOD  
NS 2000  
DS 4  
SWH 18832.393 Hz  
FIDRES 0.67573 Hz  
AQ 0.7395405 sec  
RG 16384  
DQ 26.550 usec  
DE 31.93 usec  
TE 297.7 K  
D1 1.00000000 sec  
D11 0.03000000 sec  
TD0 1

CHANNEL f1  
NUC1 13C  
P1 9.95 usec  
PL1 -1.00 dB  
PL1W 47.43416595 W  
SFO1 75.4755490 MHz

CHANNEL f2  
CPDPRG2 waltz16  
NUC2 1H  
PCPD2 100.00 usec  
PL2 0 dB  
PL3 17.06 dB  
PL13 16.00 dB  
PL2W 15.07131863 W  
PL12W 0.24668980 W  
PL13W 0.18973666 W  
SFO2 300.1316000 MHz

F2 - Processing parameters  
SI 32768  
SF 75.4676440 MHz  
WDW EM  
SSB 0  
GB 0  
CB 0  
PC 2.00 Hz  
MC 1.00

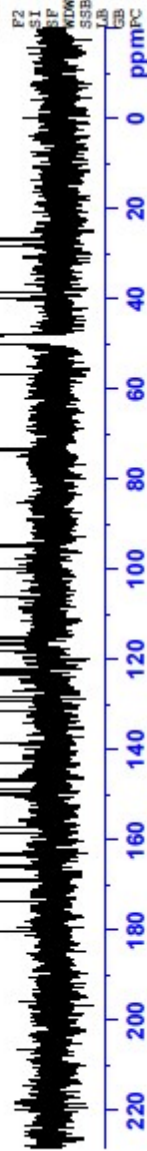

Figure 21: <sup>13</sup>C NMR (14)

ubc\_1H\_CDCl3 (C:\Bruker\topspin2.1) swithers 17



Current Data Parameters  
NAME MDC279-20190529  
EXPNO 1  
PROCNO 1

F2 - Acquisition Parameters  
Date\_ 20190530  
Time 9.00  
INSTRUM spect  
PROBHD 5 mm QNP 1H/1  
PULPROG zg30  
TD 16466  
SOLVENT CDCl3  
NS 16  
DS 2  
SWE 3742.515 Hz  
FIDRES 0.227287 Hz  
AQ 2.1998577 sec  
RG 35.9  
DM 133.600 usec  
DE 6.00 usec  
TE 298.2 K  
D1 1.0000000 sec  
TD0 1

CHANNEL f1  
NUC1 1H  
P1 13.25 usec  
PL1 0 dB  
PL1W 15.07131863 W  
SFO1 300.1318008 MHz

F2 - Processing parameters  
SI 32768  
SF 300.1300108 MHz  
WDW EM  
SSB 0  
LB 0.50 Hz  
GB 0  
PC 1.00

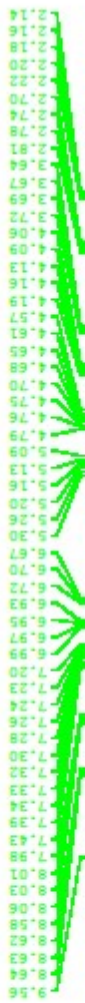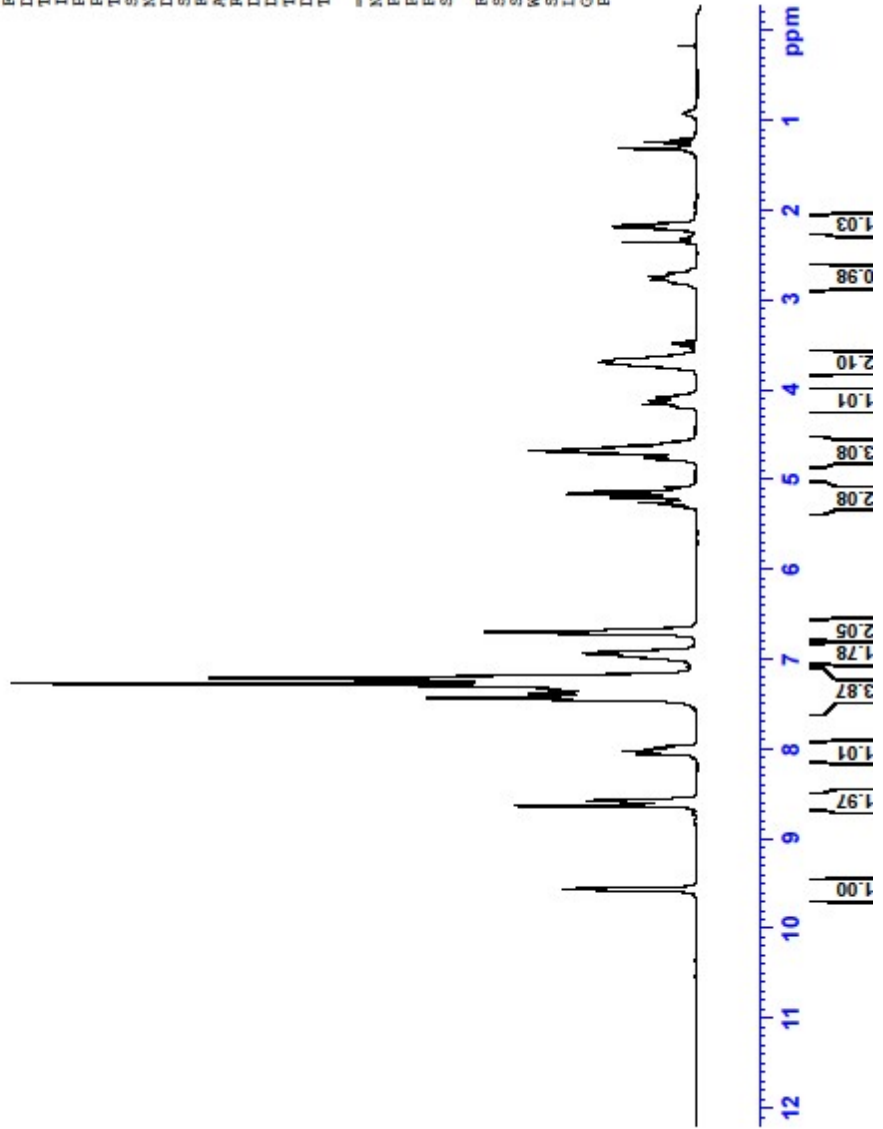

Figure 22: <sup>1</sup>H NMR (19)



ubc\_13c(1h) CDCl3 (C:\Bruker\topspin2.1) swithers 17

114.69  
116.11  
121.33  
121.42  
127.03  
127.12  
127.47  
127.74  
127.94  
128.15  
128.34  
128.67  
128.91  
133.74  
135.85  
136.26  
136.74  
138.15  
147.89  
154.42  
154.88  
157.90  
158.89

Current Data Parameters  
 NAME MFC219-20190529  
 EXPNO 2  
 PROCNO 1

F2 - Acquisition Parameters  
 Date\_ 20190531  
 Time 1.52  
 INSTRUM spect  
 PROBH 5 mm QNP 1H/1  
 PULPROG zgpg30  
 TD 27870  
 SOLVENT CDCl3  
 NS 1000  
 DS 4  
 SWH 18832.393 Hz  
 FIDRES 0.675723 Hz  
 AQ 0.73959405 sec  
 RG 16384  
 DW 26.550 usec  
 DE 37.93 usec  
 TE 298.5 K  
 D1 1.00000000 sec  
 D11 0.03000000 sec  
 TD0 1

CHANNEL f1  
 NUC1 13C  
 P1 10.00 usec  
 PL1 -1.00 dB  
 PL1W 47.43416595 W  
 SFO1 75.4755490 MHz

CHANNEL f2  
 CPDPRG2 waltz16  
 NUC2 1H  
 PCPD2 100.00 usec  
 PL2 0 dB  
 PL2W 17.56 dB  
 PL3 16.00 dB  
 PL2W 15.07131863 W  
 PL3W 0.26432295 W  
 PL13W 0.18973666 W  
 SFO2 300.1316000 MHz

F2 - Processing parameters  
 SI 32768  
 SF 75.4677617 MHz  
 WDW EM  
 SSB 0  
 GB 0  
 EB 0  
 FB 0  
 SC 2.00 Hz  
 BPC 1.00

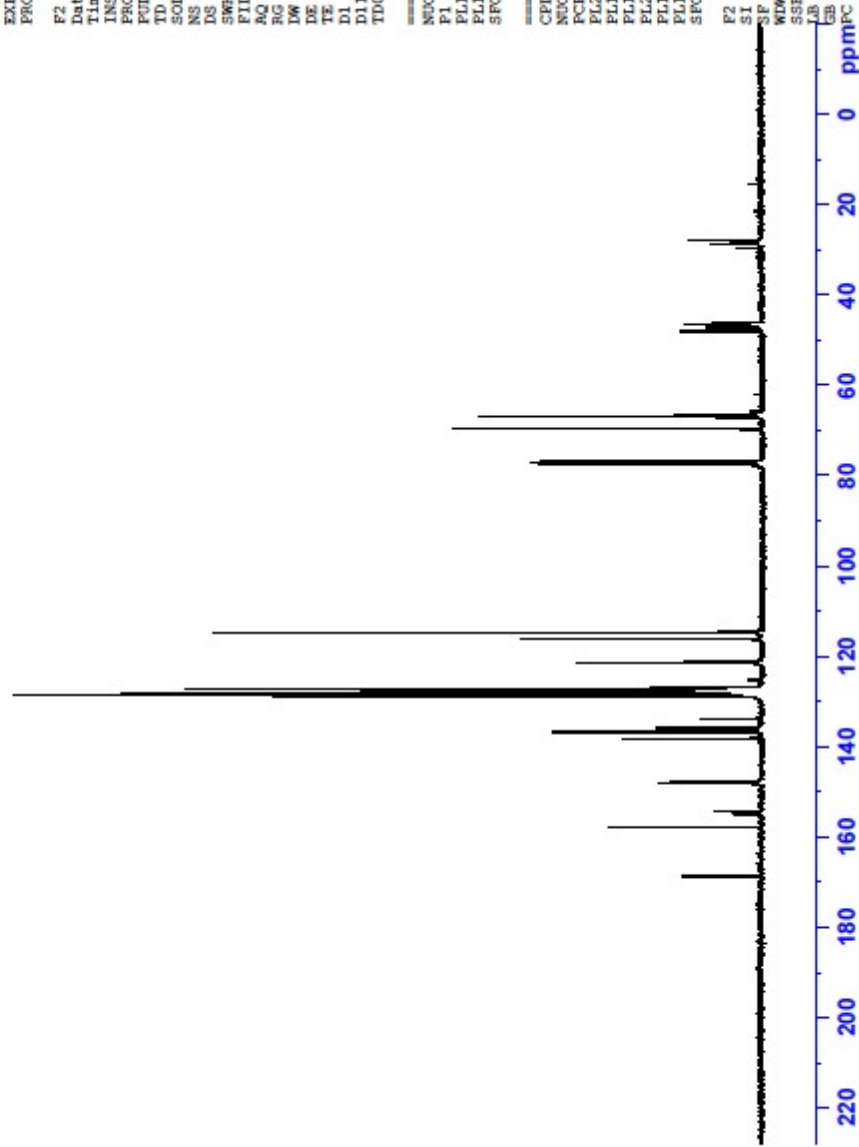

Figure 23: <sup>13</sup>C NMR (19)



13C

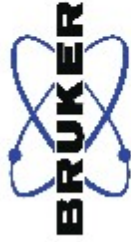

Current Data Parameters  
NAME MEC288-20190621  
EXPNO 2  
PROCNO 1

F2 - Acquisition Parameters  
Date\_ 20190622  
Time 8.41  
INSTRUM spect  
PROBHD 5 mm BBO BB-1H  
PULPROG zgpg30  
TD 32768  
SOLVENT CDCl3  
NS 533  
DS 2  
SWH 25125.629 Hz  
FIDRES 0.766773 Hz  
AQ 0.6520832 sec  
RG 812.7  
DQ 19.900 usec  
DE 16.00 usec  
TE 298.8 K  
D1 1.00000000 sec  
D11 0.03000000 sec  
TD0 1

CHANNEL f1  
NUC1 13C  
P1 7.45 usec  
PL1 -2.00 dB  
PL1W 56.92932510 W  
SFO1 100.6379188 MHz

CHANNEL f2  
CPDPRG12 waltz16  
NUC2 1H  
PCPD2 90.00 usec  
PL2 -2.00 dB  
PL2 14.64 dB  
PL13 20.00 dB  
PL2W 23.88643074 W  
PL12W 0.5178710 W  
PL13W 0.15071319 W  
SFO2 400.1916008 MHz

F2 - Processing parameters  
SI 32768  
SF 100.6279475 MHz  
WDW 0  
SSB 0  
LB 0  
GB 0  
PC 1.00 Hz  
MC 1.40

175.57  
175.16  
158.34  
158.30  
155.09  
154.41  
137.08  
137.00  
136.69  
136.49  
129.10  
129.04  
128.66  
128.60  
128.54  
128.46  
128.32  
128.15  
128.05  
127.72  
127.69  
114.93  
70.06  
67.38  
67.32  
64.10  
63.77  
47.50  
46.55  
46.41  
46.10  
28.77  
27.77

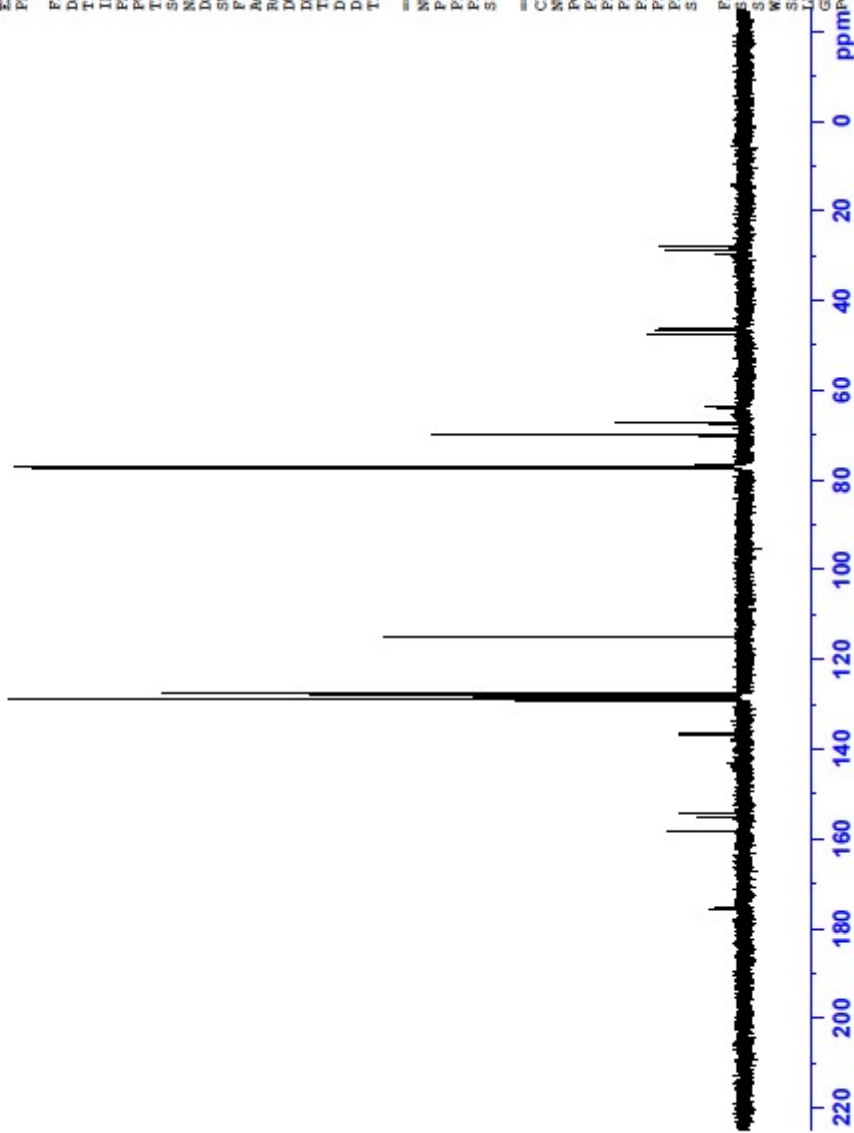

Figure 25: <sup>13</sup>C NMR (21)









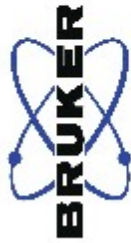

Current Data Parameters  
 NAME MBC298  
 EXPNO 2  
 PROCNO 1

F2 - Acquisition Parameters  
 Date\_ 20190716  
 Time 8.10  
 INSTRUM spect  
 PROBHD 5 mm BBO BB-1H  
 PULPROG zgpg30  
 TD 32768  
 SOLVENT CDCl3  
 NS 751  
 DS 2  
 SWH 25125.629 Hz  
 FIDRES 0.766773 Hz  
 AQ 0.6520832 sec  
 RG 812.7  
 IQW 19.900 usec  
 DE 16.000 usec  
 TE 298.8 K  
 D1 1.00000000 sec  
 D11 0.03000000 sec  
 TD0 1

CHANNEL f1  
 NUC1 13C  
 P1 8.40 usec  
 PL1 -2.00 dB  
 PL1W 59.71607590 W  
 SFO1 100.6379188 MHz

CHANNEL f2  
 CPDPRG2 waltz16  
 NUC2 1H  
 PCPD2 90.00 usec  
 PL2 -2.00 dB  
 PL2 14.48 dB  
 PL3 20.00 dB  
 PLZ 23.88643074 W  
 PL1W 0.53721893 W  
 PL13W 0.15071319 W  
 SFO2 400.1916008 MHz

F2 - Processing parameters  
 SI 32768  
 SF 100.6279602 MHz  
 MWDW no  
 SSB 0  
 GB 0 Hz  
 GB 0  
 ppmFC 1.40

13C

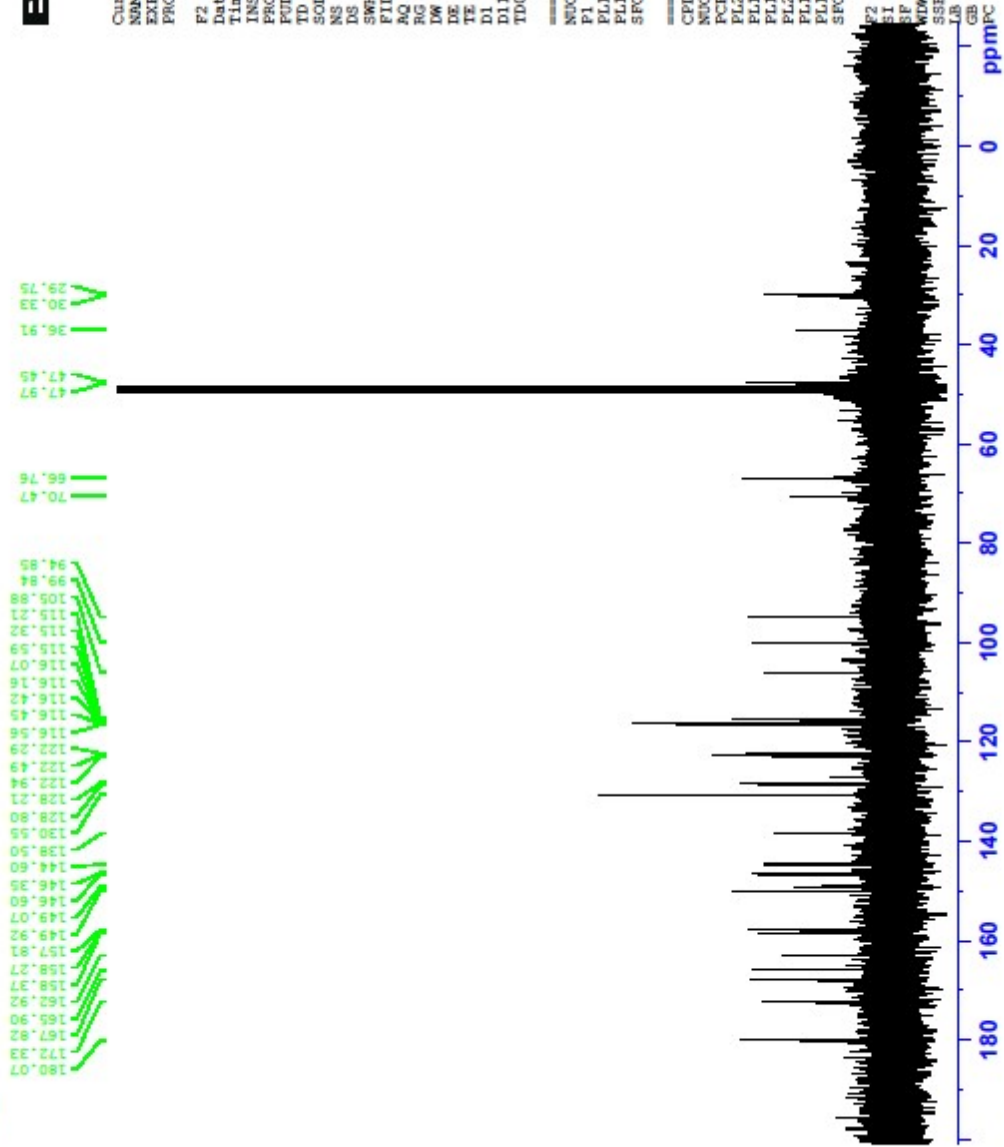

Figure 29: <sup>13</sup>C NMR (17)



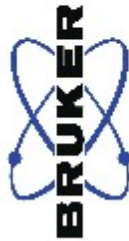

ubc\_13c(1H) CDCl3 (C:\Bruker\topspin2.1) swithers 23

174.66  
163.40  
159.98  
158.98  
153.78  
151.31  
148.66  
140.14  
137.10  
136.23  
135.63  
128.92  
128.76  
128.73  
128.65  
128.18  
127.98  
127.73  
127.38  
127.27  
127.23  
126.88  
126.68  
123.72  
122.48  
114.68  
114.03  
109.53  
98.43  
93.88  
79.23  
71.48  
71.02  
70.97  
70.68  
69.47  
52.88

Current Data Parameters  
 NAME MBC162  
 EXPNO 2  
 PROCNO 1

F2 - Acquisition Parameters  
 Date\_ 20180917  
 Time 1.35  
 INSTRUM spect  
 PROBH 5 mm QNP 1H/1  
 PULPROG zgpg30  
 TD 27870  
 SOLVENT CDCl3  
 NS 4000  
 DS 4  
 SWH 18832.393 Hz  
 FIDRES 0.675723 Hz  
 AQ 0.73959405 sec  
 RG 16384  
 DW 26.550 usec  
 DE 31.93 usec  
 TE 297.7 K  
 D1 1.00000000 sec  
 D11 0.03000000 sec  
 TDO 1

CHANNEL f1  
 NUC1 13C  
 P1 9.95 usec  
 PL1 -1.00 dB  
 PL1W 47.43416595 W  
 SFO1 75.4755490 MHz

CHANNEL f2  
 CPDPRG2 waltz16  
 NUC2 1H  
 PCPD2 100.00 usec  
 PL2 0 dB  
 PL3 17.06 dB  
 PL13 16.00 dB  
 PL2W 15.07131863 W  
 PL12W 0.24668980 W  
 PL13W 0.18973666 W  
 SFO2 300.1316000 MHz

F2 - Processing parameters  
 SI 32768  
 SF 75.4677412 MHz  
 WDW EM  
 SSB 0  
 GB 0  
 LB 0  
 GB 0  
 MC 2.00 Hz  
 PC 1.00

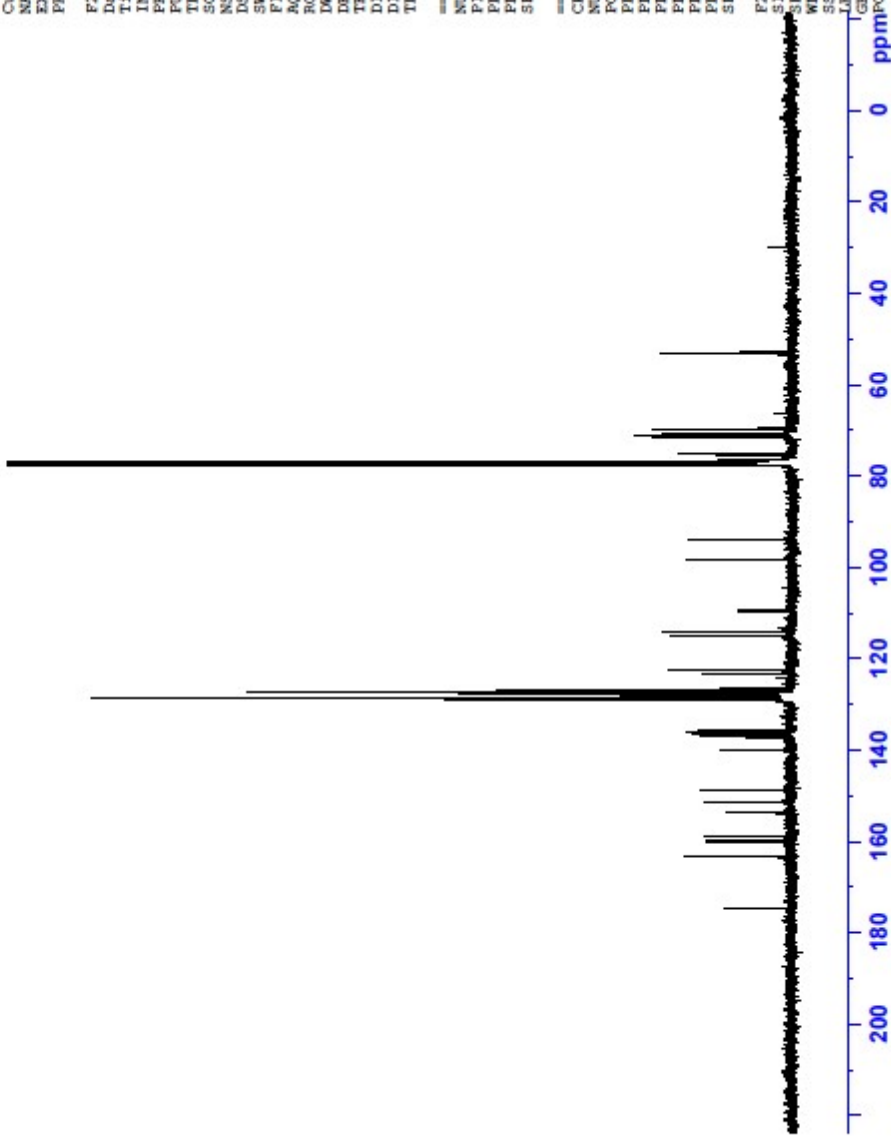

Figure 31: <sup>13</sup>C NMR (26)





ubc\_13c(1H) CDCl3 (C:\Bruker\topspin2.1) swithers 3

173.64  
167.93  
159.88  
158.77  
152.83  
151.07  
148.56  
140.20  
137.21  
136.82  
136.47  
135.76  
128.91  
128.74  
128.69  
128.61  
128.54  
128.06  
127.84  
127.53  
127.33  
126.76  
123.74  
122.82  
119.45  
113.95  
110.09  
98.28  
94.02  
78.21  
77.36  
71.71  
71.06  
70.93  
70.63  
70.14  
52.26  
45.06  
32.55  
29.34  
23.53

Current Data Parameters  
 NAME MBC166-1  
 EXPNO 2  
 PROCNO 1

F2 - Acquisition Parameters  
 Date\_ 20180922  
 Time 18.08  
 INSTRUM spect  
 PROBH 5 mm QNP 1H/1  
 PULPROG zgpg30  
 TD 27870  
 SOLVENT CDCl3  
 NS 4000  
 DS 4  
 SWH 18832.393 Hz  
 FIDRES 0.67573 Hz  
 AQ 0.7395405 sec  
 RG 16384  
 DW 26.550 usec  
 DE 37.93 usec  
 TE 299.0 K  
 D1 1.00000000 sec  
 D11 0.03000000 sec  
 TD0 1

CHANNEL f1  
 NUC1 13C  
 P1 9.95 usec  
 PL1 -1.00 dB  
 PL1W 47.43416595 W  
 SFO1 75.4755490 MHz

CHANNEL f2  
 CPDPRG2 waltz16  
 NUC2 1H  
 PCPD2 100.00 usec  
 PL2 0 dB  
 PL2 17.86 dB  
 PL3 18.00 dB  
 PL2W 15.07131863 W  
 PL2W 0.24668980 W  
 PL3W 0.18973666 W  
 SFO2 300.1316000 MHz

F2 - Processing parameters  
 SI 32768  
 SF 75.4677402 MHz  
 EN  
 NLW 0  
 SSB 0  
 LB 2.00 Hz  
 GB 0  
 MC 1.00

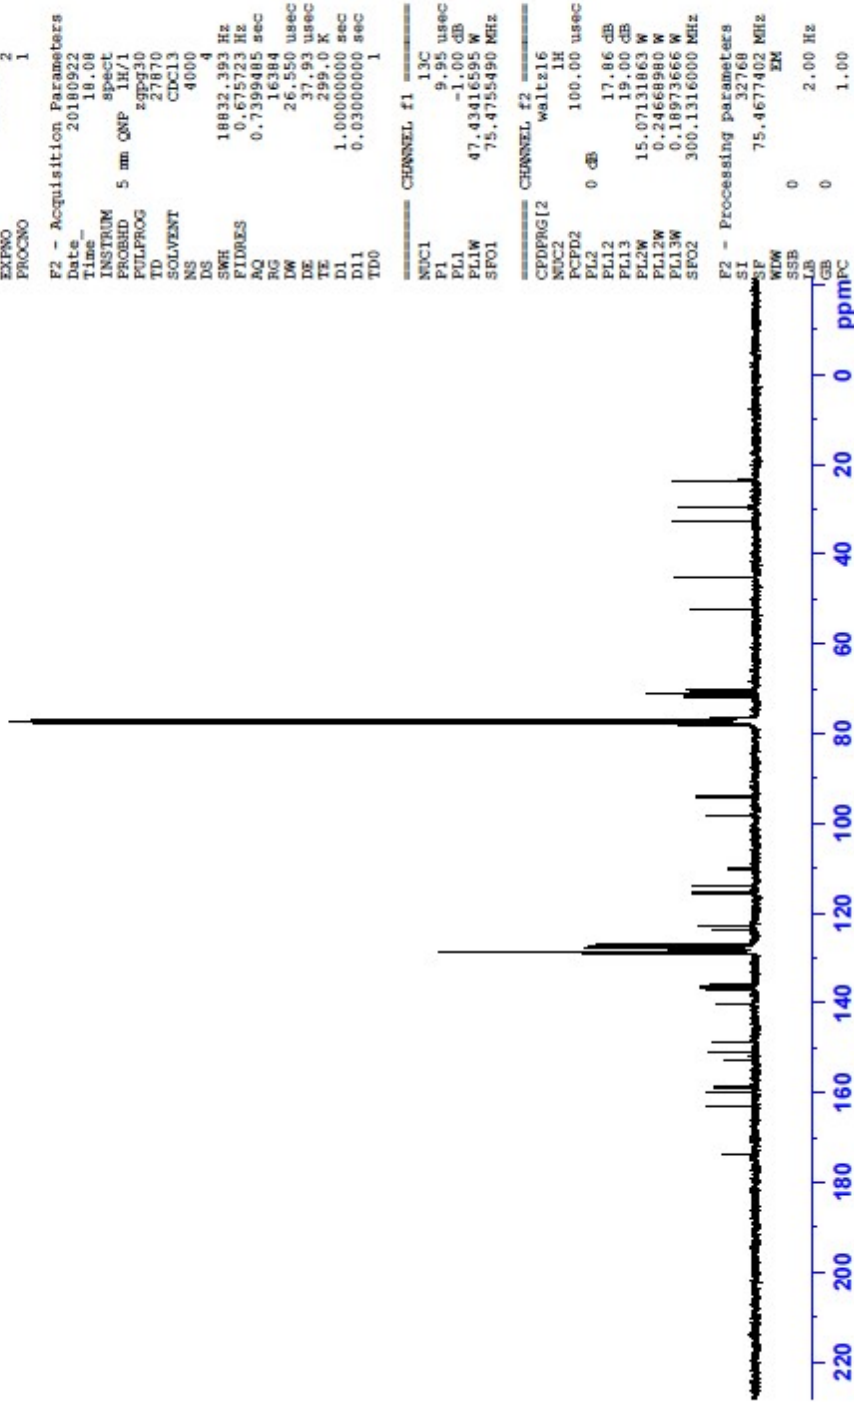

Figure 33: <sup>13</sup>C NMR (27)

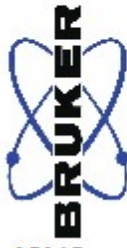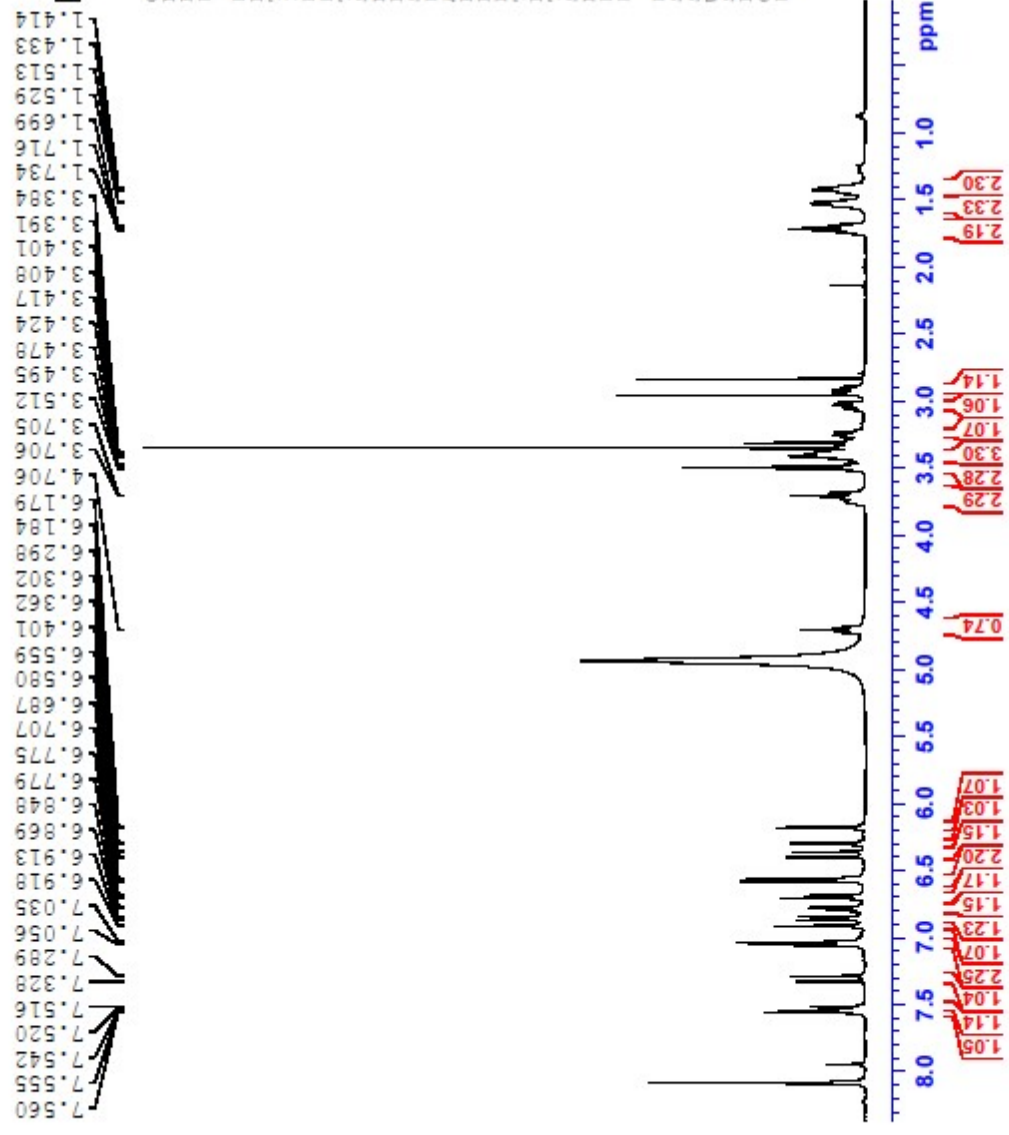

Figure 34: <sup>1</sup>H NMR (30a)



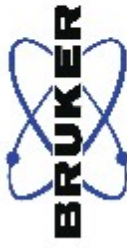

Current Data Parameters  
NAME HB57  
EXPNO 1  
PROCNO 1

F2 - Acquisition Parameters  
Date\_ 20190723  
Time\_ 4.00 h  
INSTRUM spect  
PROBHD E116098 0335  
PULPROG zgpg30  
TD 65536  
SOLVENT C6D6  
NS 177  
DS 2  
SWE 24038.461 Hz  
FIDRES 0.733596 Hz  
AQ 1.3631488 sec  
RG 199.6  
DM 20.800 usec  
DE 6.50 usec  
TE 298.2 K  
D1 1.0000000 sec  
D11 0.0300000 sec  
TD0 16  
SFO1 100.6404330 MHz  
NUC1 13C  
P1 9.60 usec  
PLW1 68.0000000 W  
SFO2 400.2016008 MHz  
NUC2 1H  
CEDEMG12 waltz16  
PCPD2 90.00 usec  
PLW2 16.0000000 W  
PLW12 0.17902000 W  
PLW13 0.09004700 W

F2 - Processing parameters  
SI 32768  
SF 100.6306246 MHz  
WDW no  
SSB 0  
LB 0 Hz  
GB 0  
PC 1.40

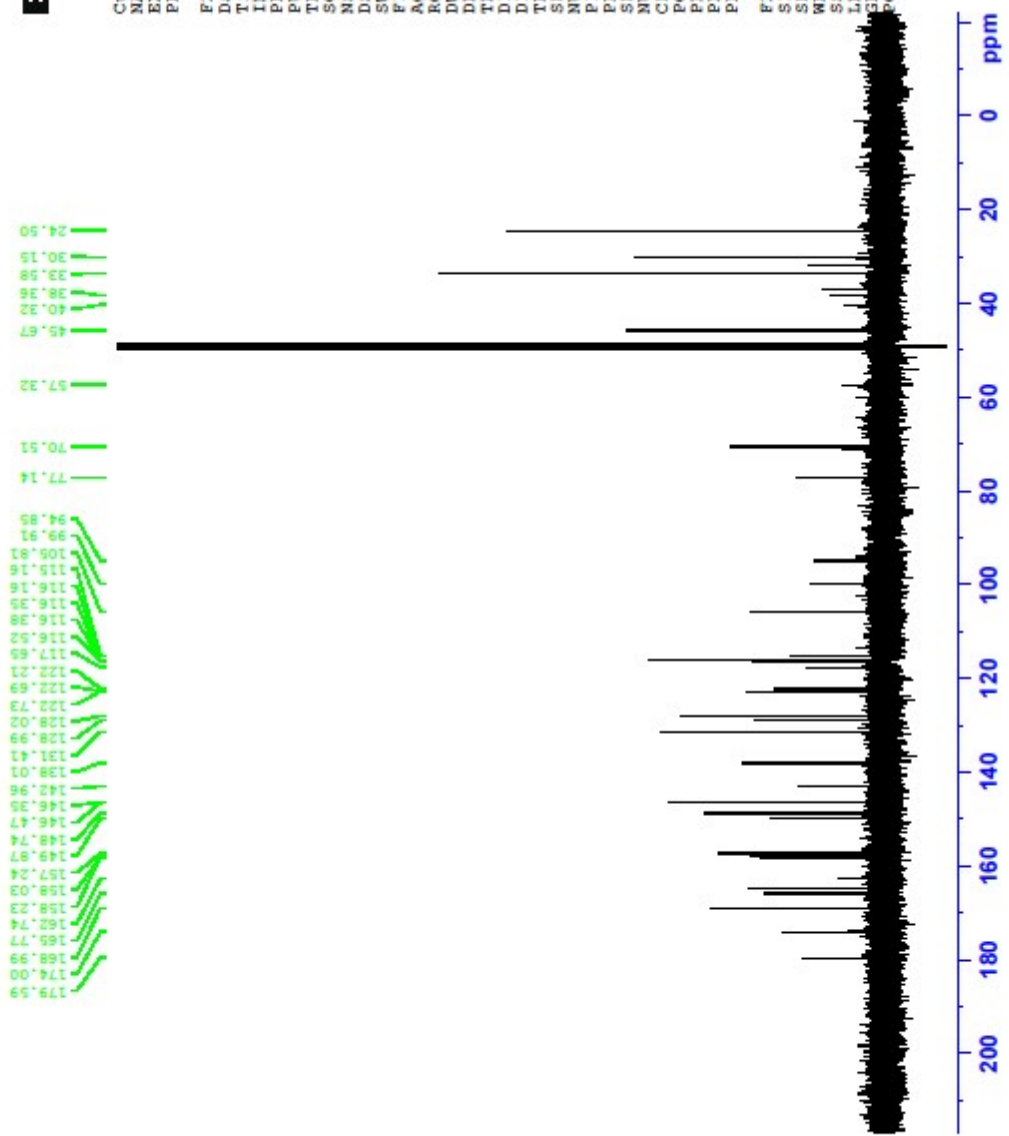

Figure 35: <sup>13</sup>C NMR (30a)

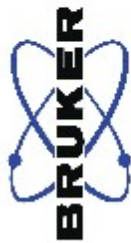

Current Data Parameters  
NAME HB56  
EXPNO 1  
PROCNO 1

F2 - Acquisition Parameters  
Date\_ 20190723  
Time\_ 4.45  
INSTRUM spect  
PROBHD 5 mm BBO BB-1H  
PULPROG zg30  
TD 32768  
SOLVENT CDCl3  
NS 32  
DS 2  
SWE 5592.841 Hz  
FIDRES 0.170680 Hz  
AQ 2.9294591 sec  
RG 71.8  
DM 89.400 usec  
DE 6.50 usec  
TE 298.1 K  
D1 1.00000000 sec  
TDO 1

CHANNEL f1  
NUC1 1H  
P1 13.50 usec  
PL -2.00 dB  
PL1W 23.88643074 W  
SFO1 400.1926012 MHz

F2 - Processing parameters  
SI 32768  
SF 400.1909738 MHz  
WDW no  
SSB 0  
LB 0 Hz  
GB 0  
PC 1.00

<sup>1</sup>H

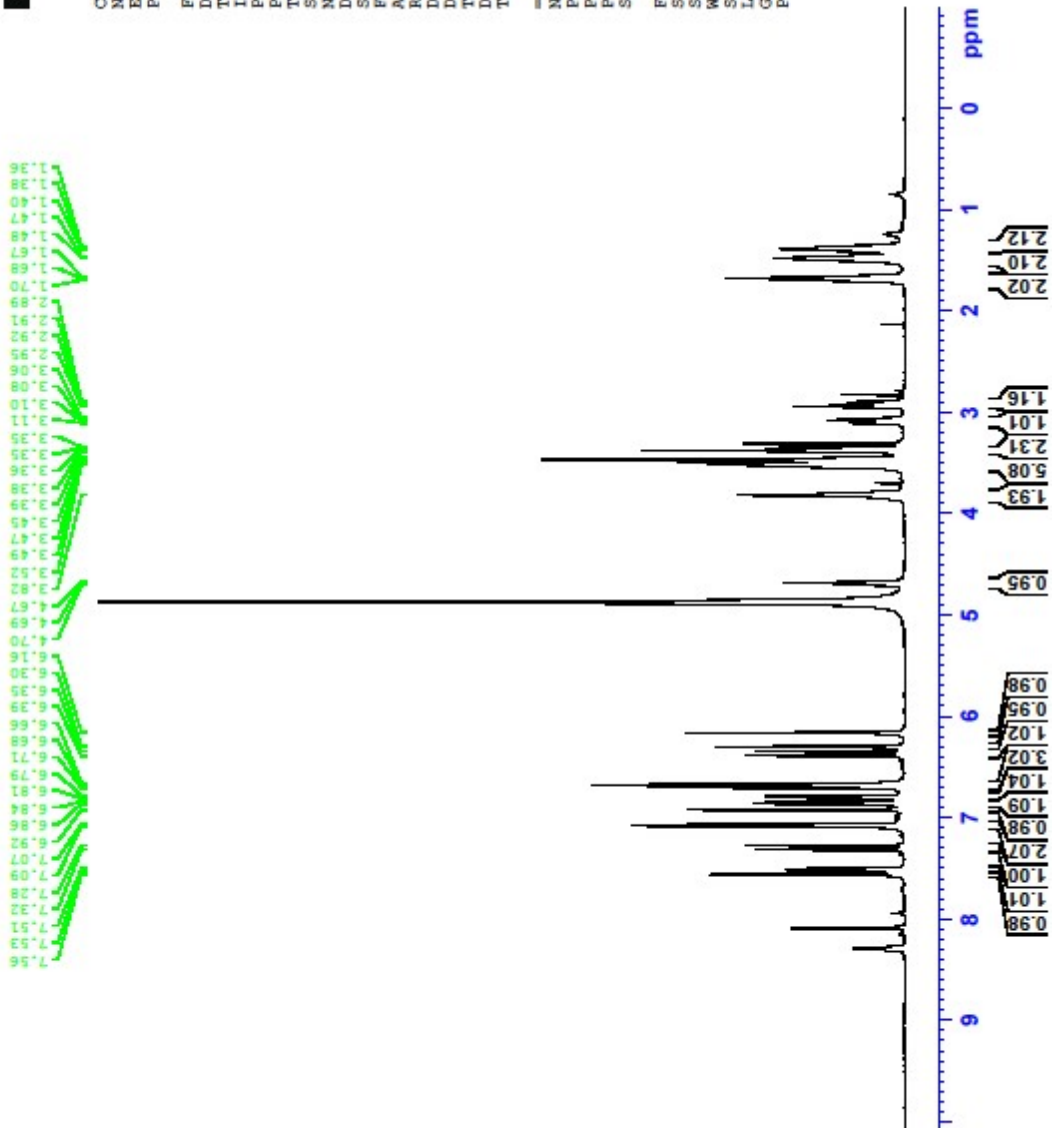

Figure 36: <sup>1</sup>H NMR (30b)

13C

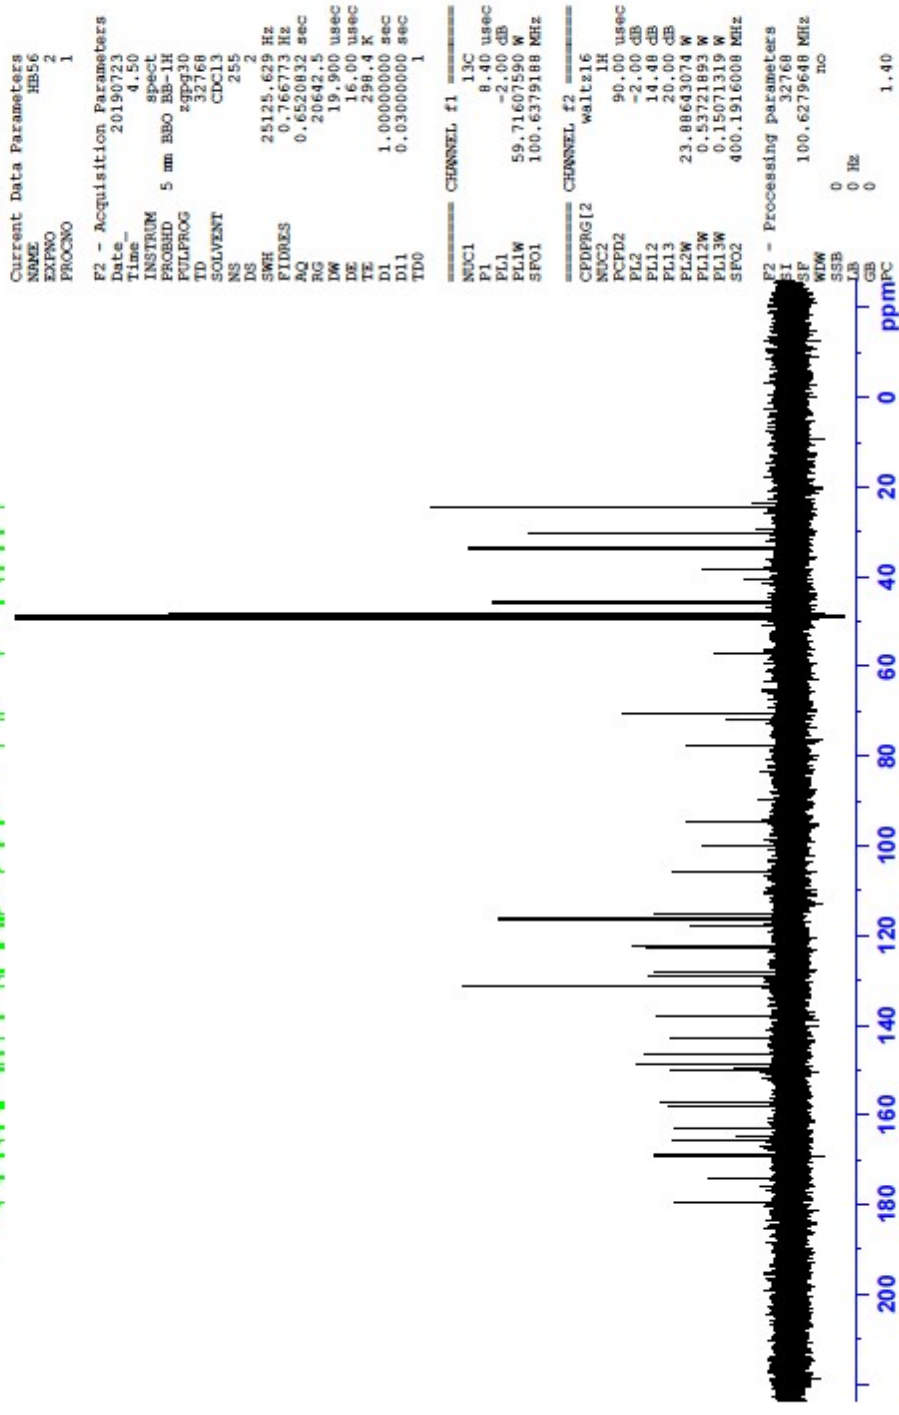

Figure 37: <sup>13</sup>C NMR (30b)

ubc\_1H MeOD (C:\Bruker\topspin2.1) swithers 42

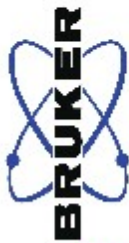

Current Data Parameters  
NAME MBC391S  
EXPNO 1  
PROCNO 1

F2 - Acquisition Parameters  
Date\_ 20190724  
Time 12.02  
INSTRUM spect  
PROBHD 5 mm QNP 1H/1  
PULPROG zg30  
TD 16466  
SOLVENT MeOD  
NS 16  
DS 2  
SWH 3742.515 Hz  
FIDRES 0.227287 Hz  
AQ 2.1998577 sec  
RG 181  
DW 133.600 usec  
DE 6.00 usec  
TE 297.9 K  
D1 1.0000000 sec  
TDO 1

===== CHANNEL f1 =====  
NUC1 1H  
P1 13.25 usec  
PL1 0 dB  
PL1W 15.07131863 W  
SFO1 300.1318008 MHz

F2 - Processing parameters  
SI 32768  
SF 300.1300076 MHz  
WDW EM  
SSB 0  
LB 0.50 Hz  
GB 0  
PC 1.00

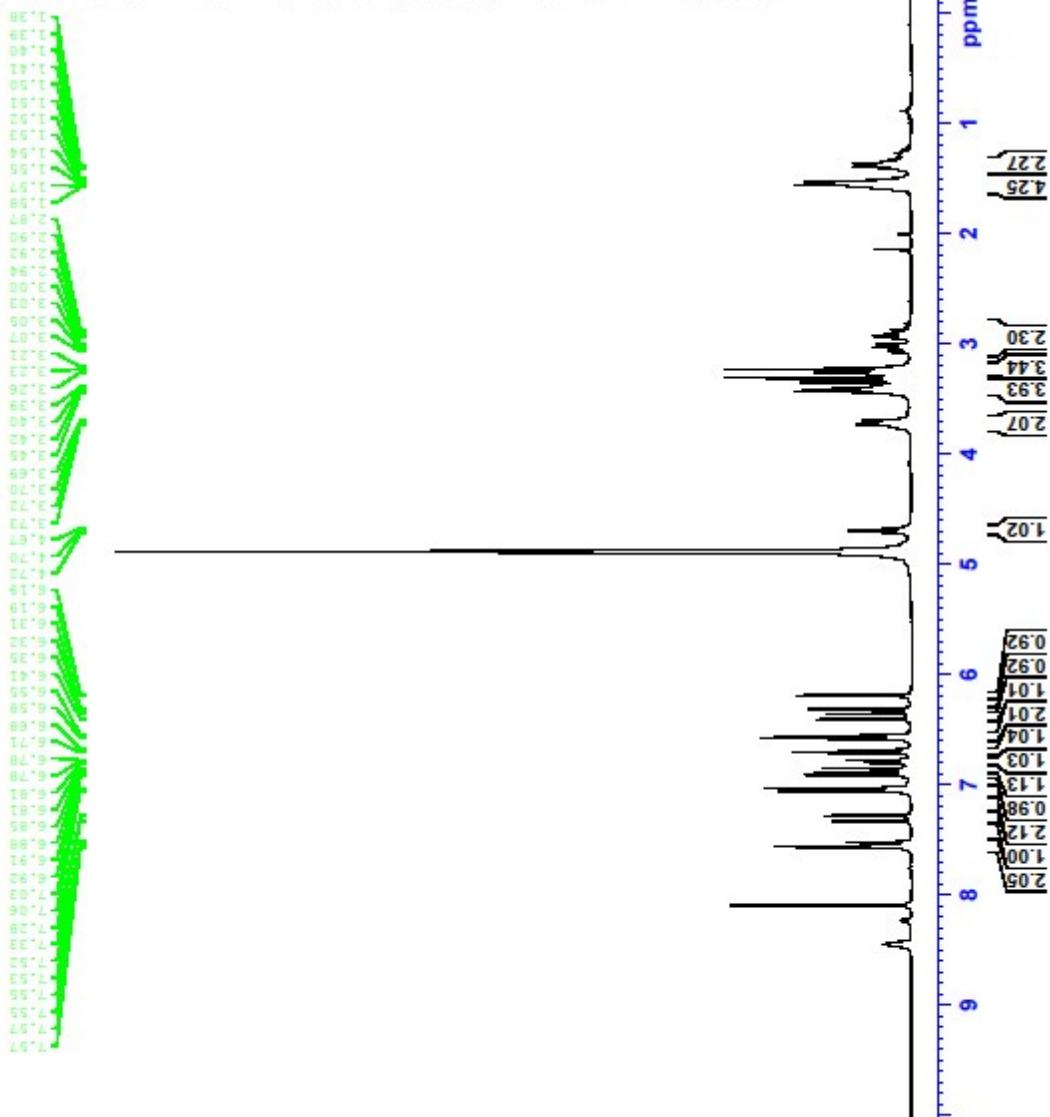

Figure 38: <sup>1</sup>H NMR (34a)

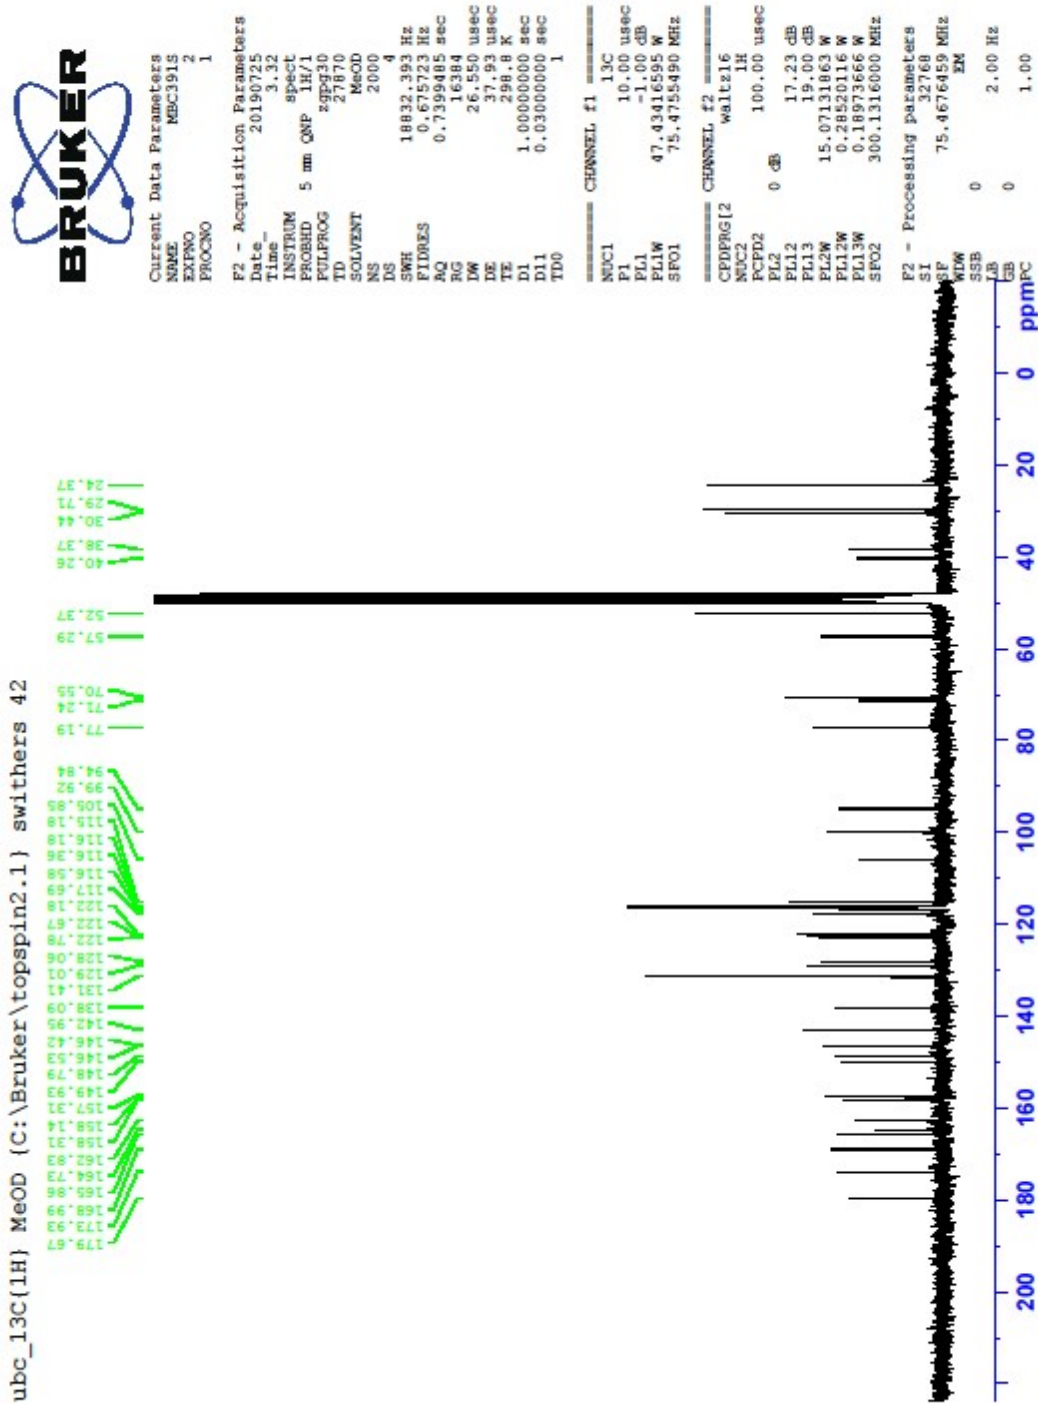

Figure 39: <sup>13</sup>C NMR (34 a)

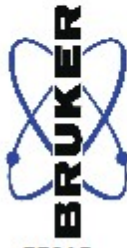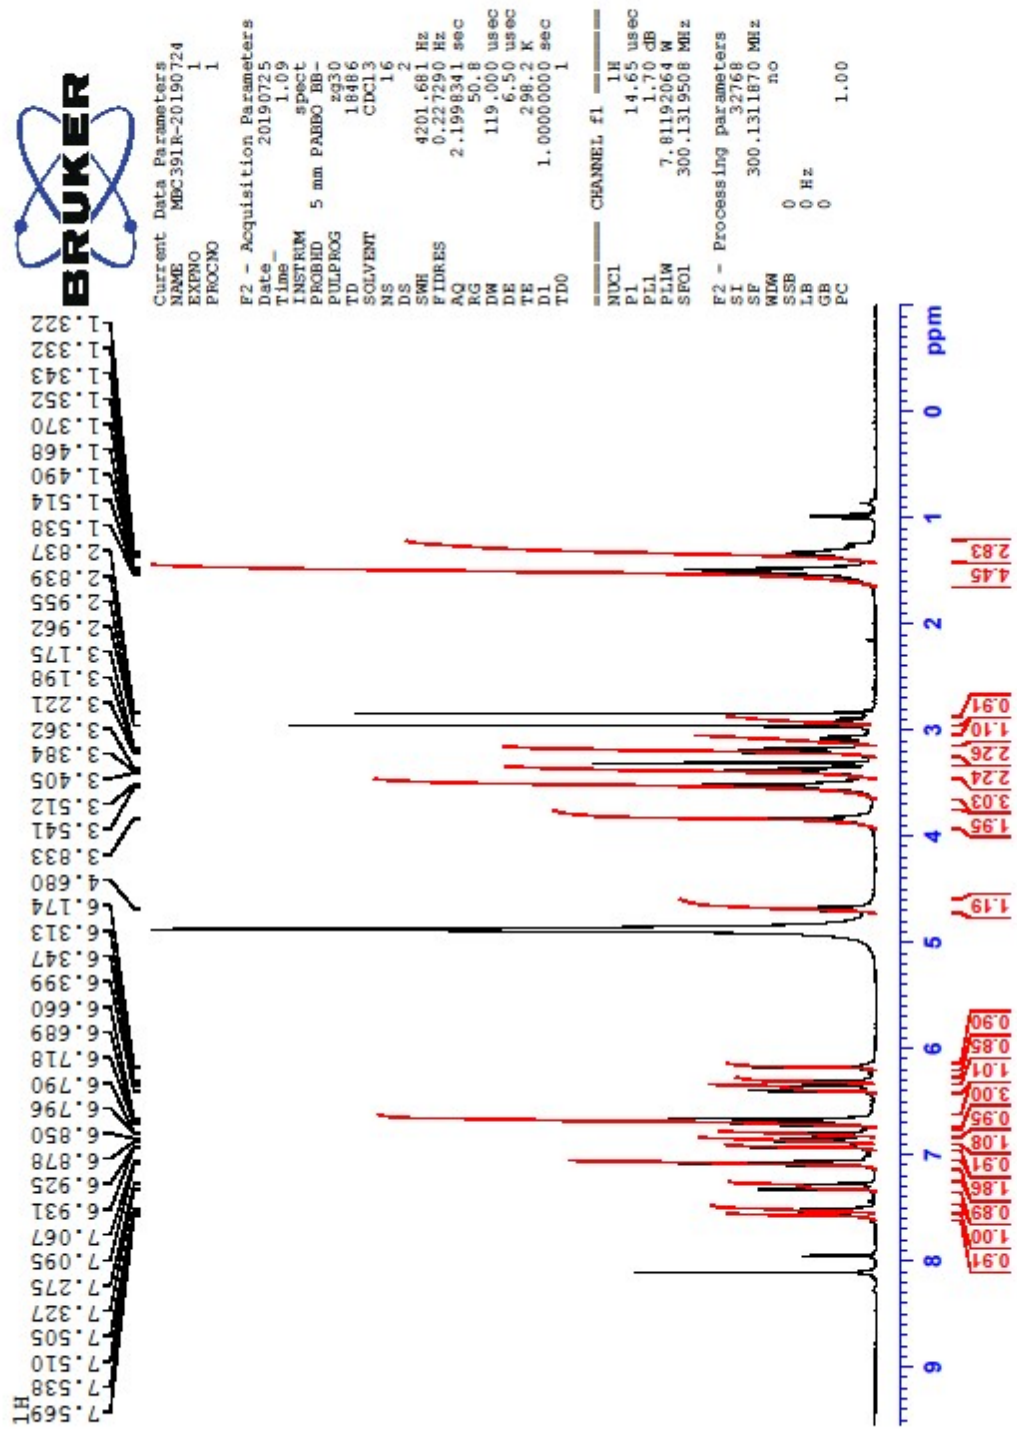

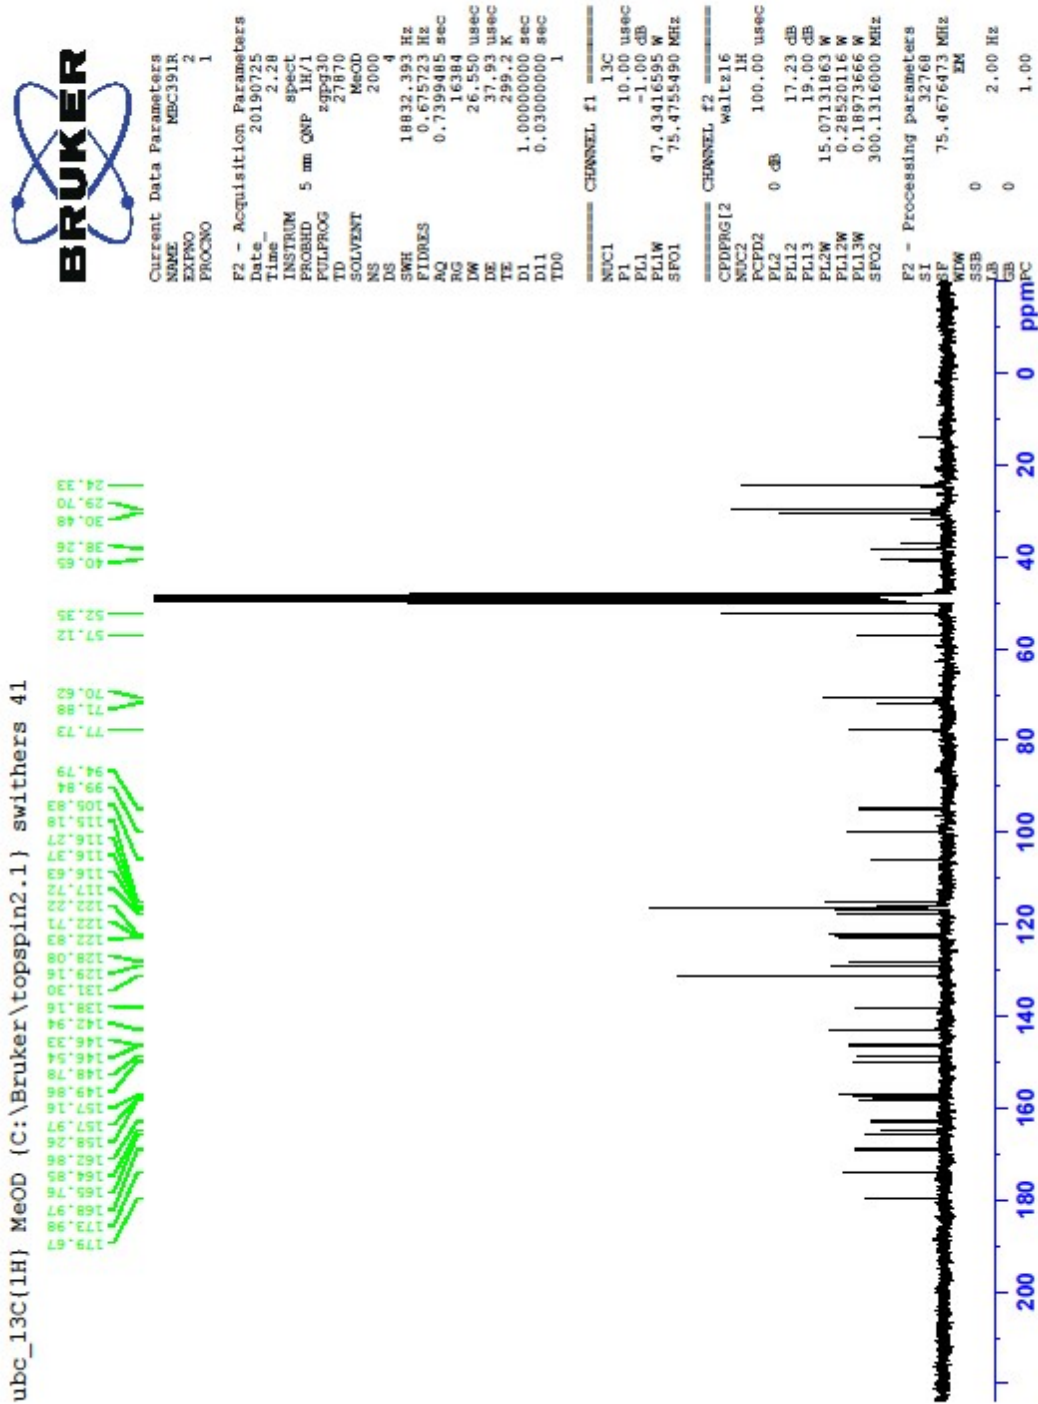

Figure 41: <sup>13</sup>C NMR (34b)

## Kinetic Analysis of Inhibitors

Human pancreatic alpha-amylase (HPA) was expressed in *Pichia pastoris* and purified as described in some detail previously<sup>2</sup>. 2-Chloro-4-nitrophenyl  $\alpha$ -maltotrioside (CNPG3) was purchased from Sekisui Enzymes. Incubation of this substrate with HPA leads to the release of 2-chloro-nitrophenol, and this was monitored by measuring the absorbance of the reaction solutions at 400 nm.

The assays were performed with either a Varian Cary 4000 UV/Vis spectrophotometer or a BioTek Synergy H1 plate reader. After the start of the reactions by addition of the substrates, the absorbance of the solutions were monitored over 5 minutes to measure the initial reaction rate. Reactions were run at 30°C in 50 mM sodium phosphate including 100 mM sodium chloride (pH 7.0). The assays were performed using two to five different [CNPG3] (2 mM and 4 mM; 2 mM, 4 mM, and 6 mM; 2 mM, 3 mM, 4 mM, 6 mM and 8 mM) for each range of inhibitor concentrations. Inhibitor concentrations generally ranging from 1/5 to 5x  $K_I$  were used. For each reaction, HPA was incubated with varying [I] at 30°C for at least 1 minute prior to addition of CNPG3 substrates. The resulting initial rate data were fit to a competitive inhibition model using nonlinear regression analysis, as performed by the GraFit 7.0 program to provide a value for  $K_I$ . Dixon and Lineweaver-Burke plots of each data set validated the use of a competitive inhibition model.

| Compound        | $K_I$ ( $\mu$ M)   |
|-----------------|--------------------|
| <b>13</b>       | 0.29 $\pm$ 0.02    |
| <b>14</b>       | 0.40 $\pm$ 0.02    |
| <b>17</b>       | 0.10 $\pm$ 0.01    |
| <b>30a</b>      | 0.07 $\pm$ 0.03    |
| <b>30b</b>      | 0.20 $\pm$ 0.06    |
| <b>36a</b>      | 0.34 $\pm$ 0.02    |
| <b>36b</b>      | 1.2 $\pm$ 0.18     |
| <b>38a</b>      | 1.56 $\pm$ 0.25    |
| <b>47a</b>      | 11 $\pm$ 1.5       |
| <b>48a</b>      | 0.76 $\pm$ 0.08    |
| <b>49a</b>      | $\sim$ 50 $\pm$ 12 |
| <b>Mini-MbA</b> | 0.39 $\pm$ 0.05    |



### Dixon Plot Competitive Fit

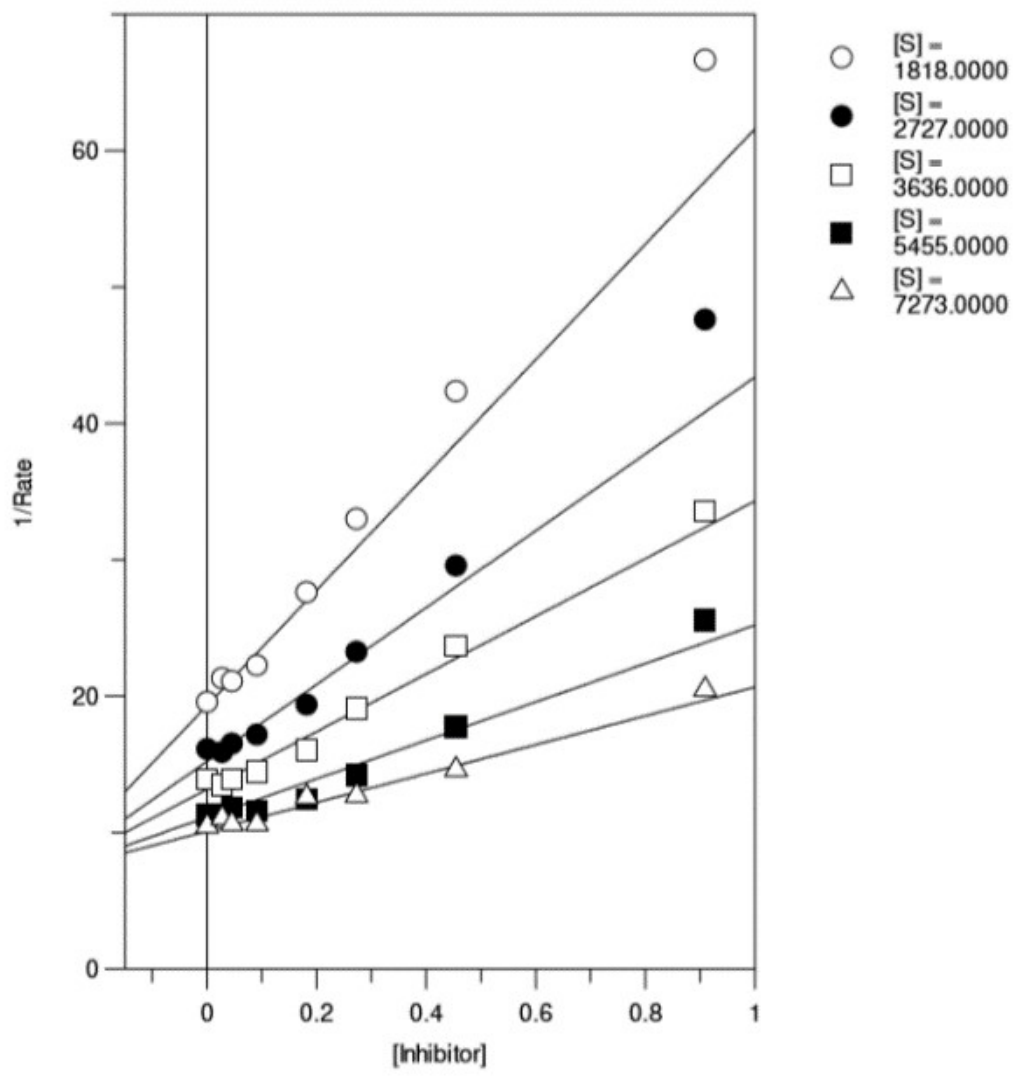

| Parameter | Value     | Std. Error |
|-----------|-----------|------------|
| Vmax      | 0.1424    | 0.0046     |
| Km        | 3184.0156 | 246.3102   |
| Ki        | 0.2910    | 0.0206     |

Figure 42: Dixon plot for 13. All concentrations in  $\mu\text{M}$

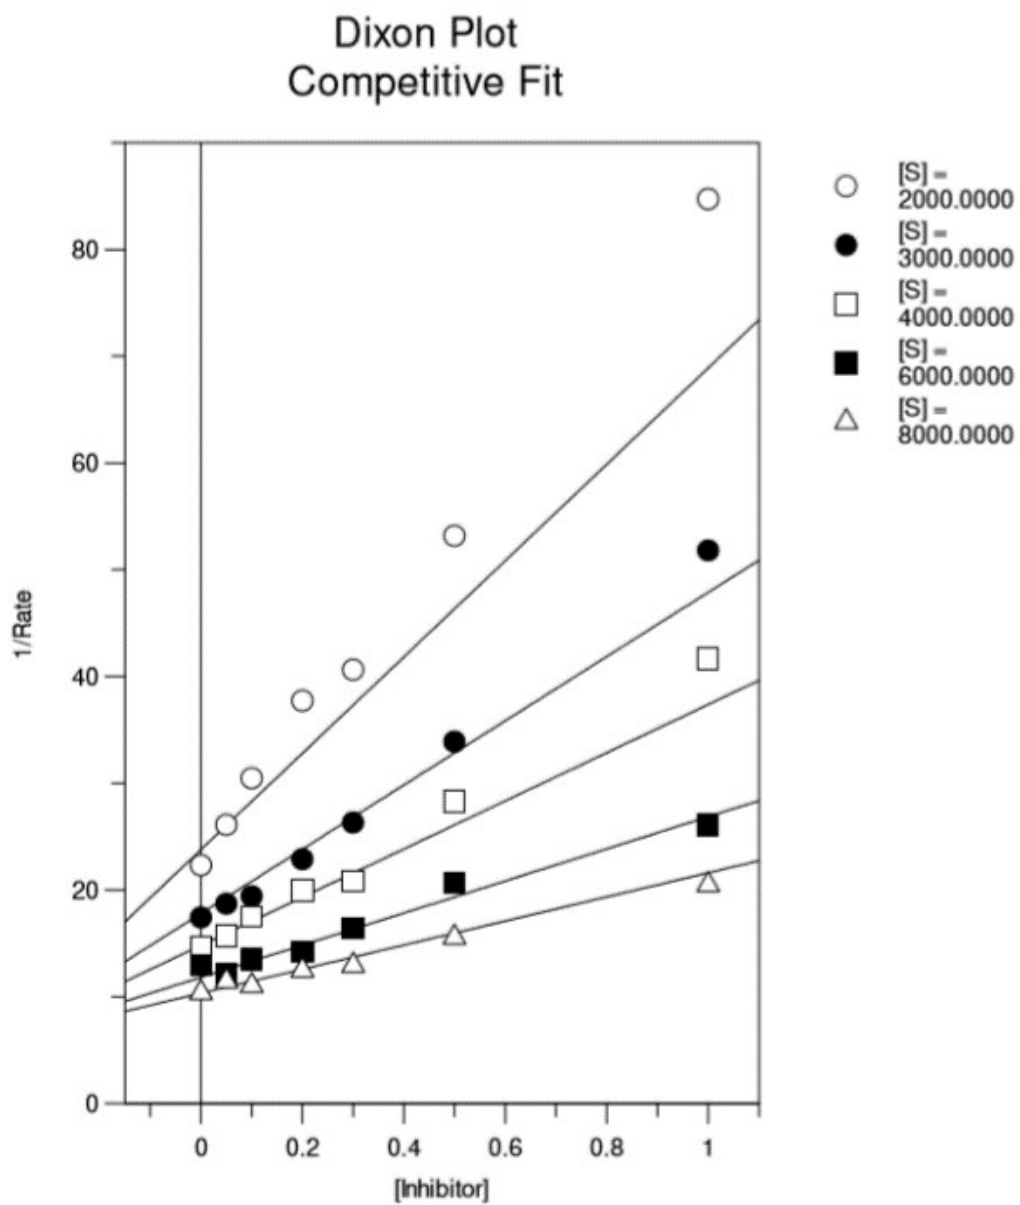

Figure 43: Dixon plot for 14. All concentrations in  $\mu\text{M}$ .

### Dixon Plot Competitive Fit

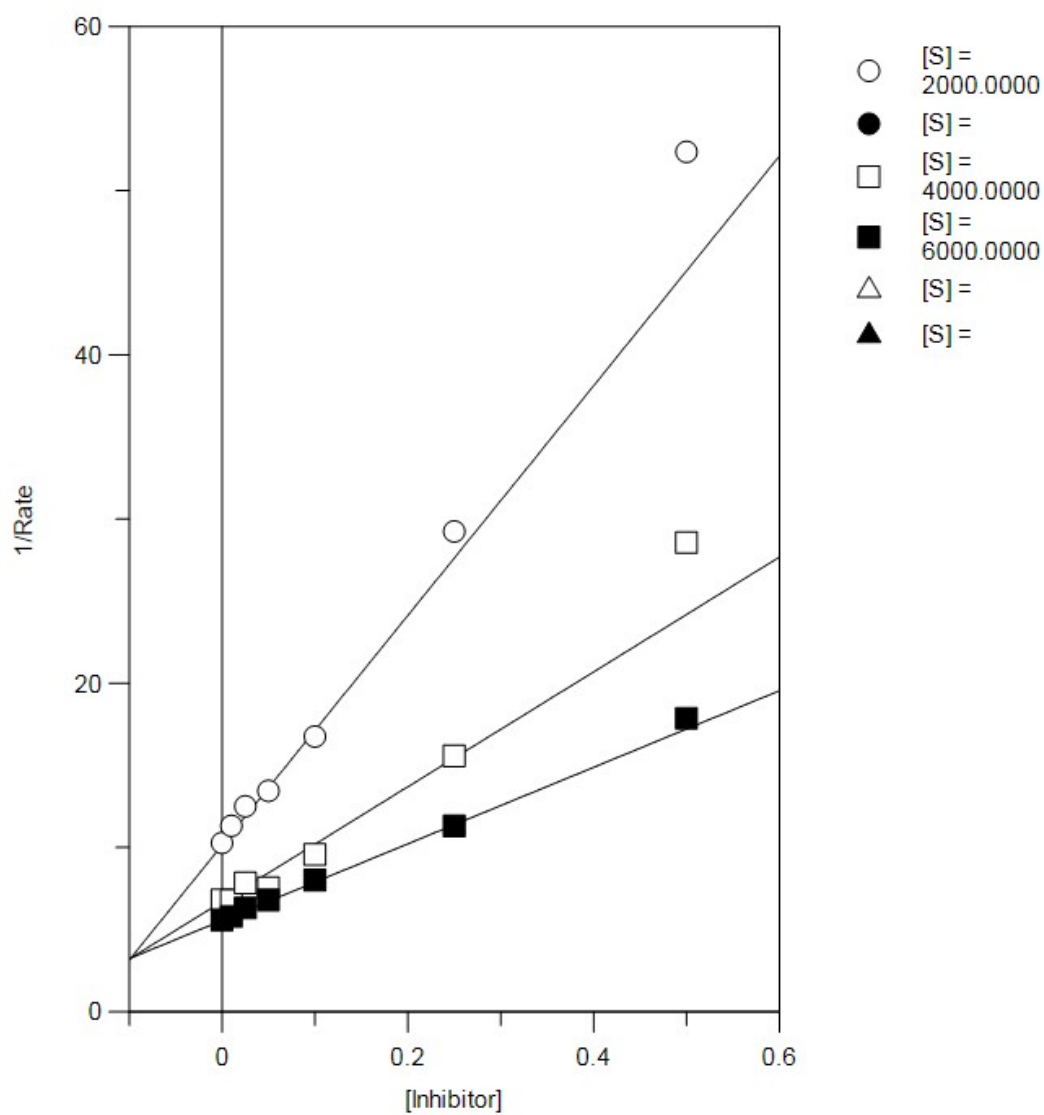

| Parameter | Value     | Std. Error |
|-----------|-----------|------------|
| Vmax      | 0.3061    | 0.0182     |
| Km        | 4214.9682 | 510.4367   |
| Ki        | 0.0985    | 0.0086     |

Figure 44: Dixon plot for **17**. All concentrations in  $\mu\text{M}$ .

### Dixon Plot Competitive Fit

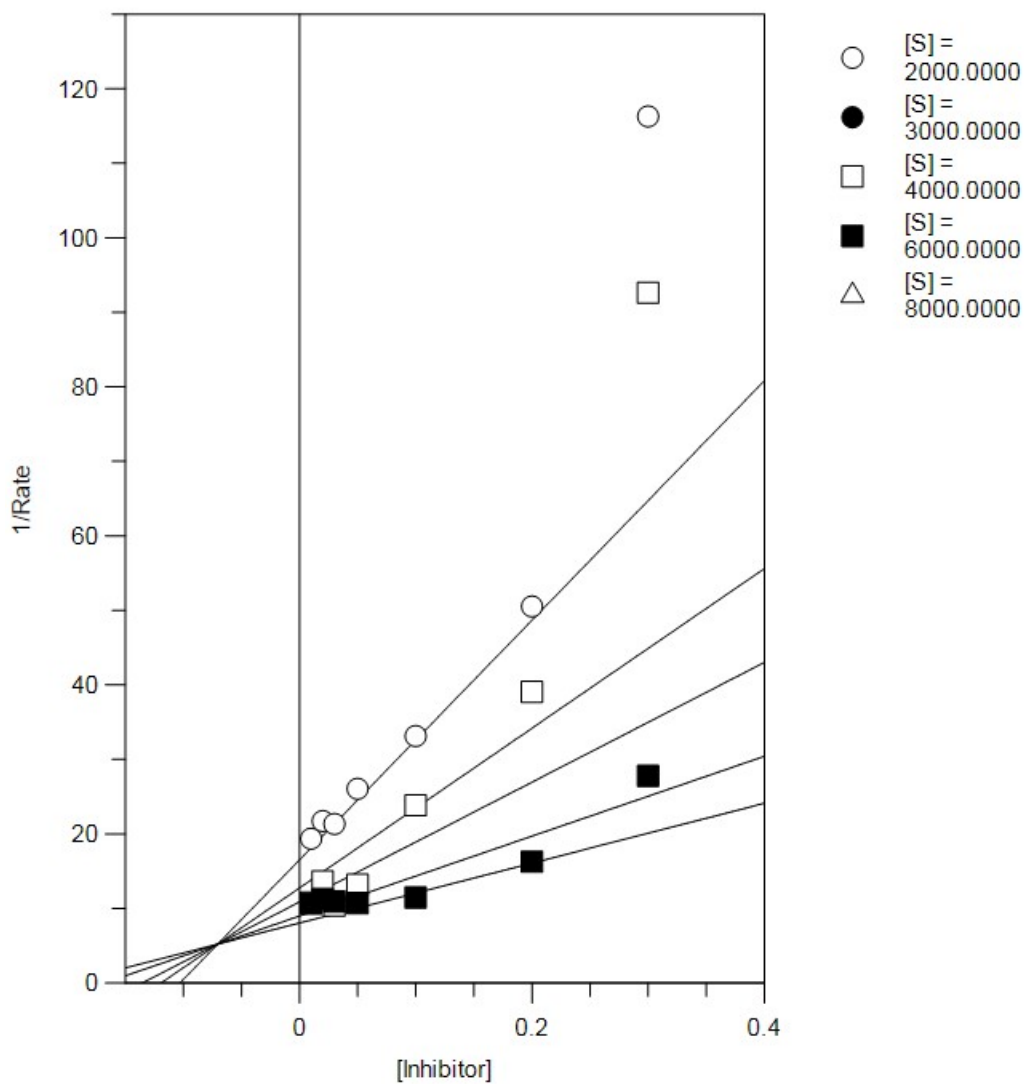

| Parameter | Value     | Std. Error |
|-----------|-----------|------------|
| Vmax      | 0.1919    | 0.0496     |
| Km        | 4345.2807 | 2277.9619  |
| Ki        | 0.0705    | 0.0256     |

Figure 45: Dixon plot for **30a**. All concentrations in  $\mu\text{M}$ .

### Dixon Plot Competitive Fit

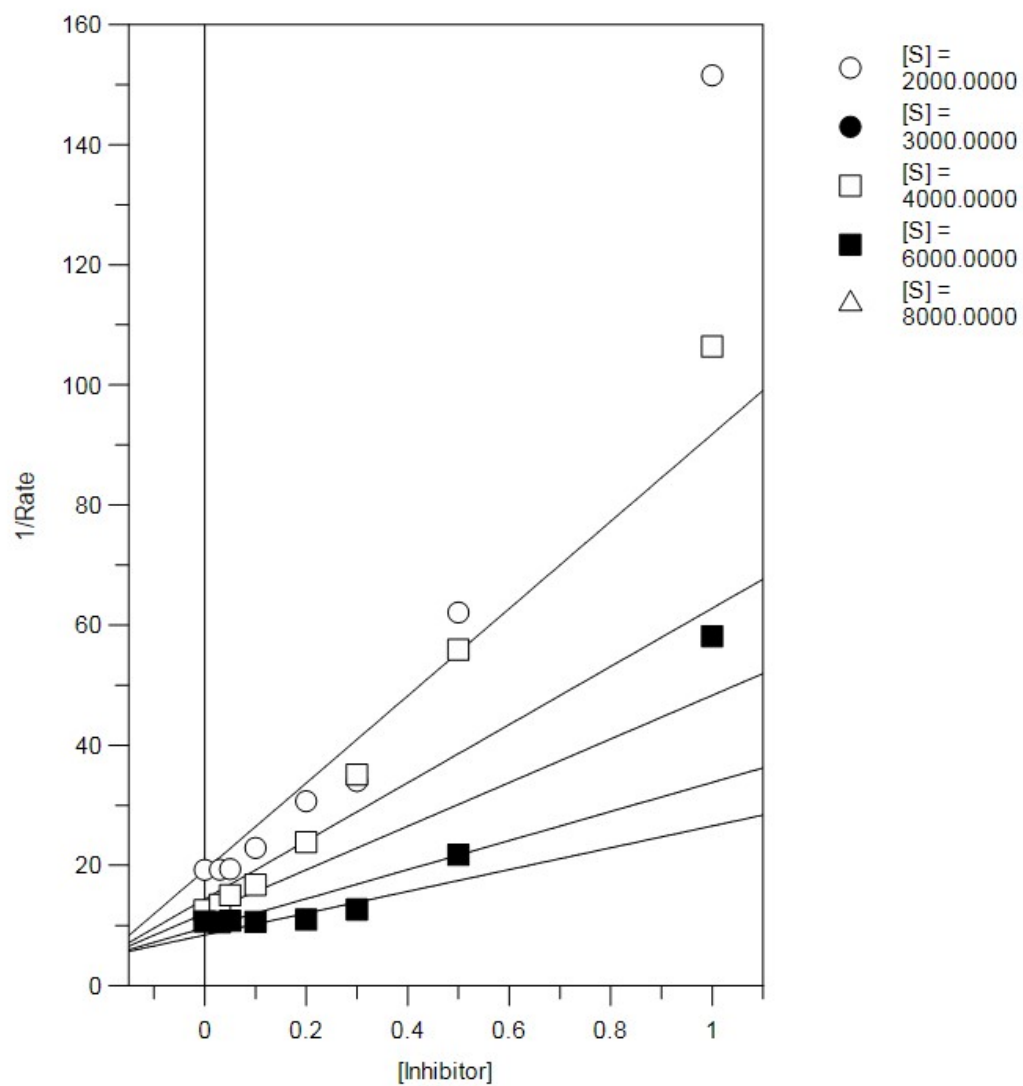

| Parameter | Value     | Std. Error |
|-----------|-----------|------------|
| Vmax      | 0.2078    | 0.0551     |
| Km        | 5977.6560 | 2782.7603  |
| Ki        | 0.1981    | 0.0587     |

Figure 46: Dixon plot for **30b**. All concentrations in  $\mu\text{M}$ .

## Dixon Plot Competitive Fit

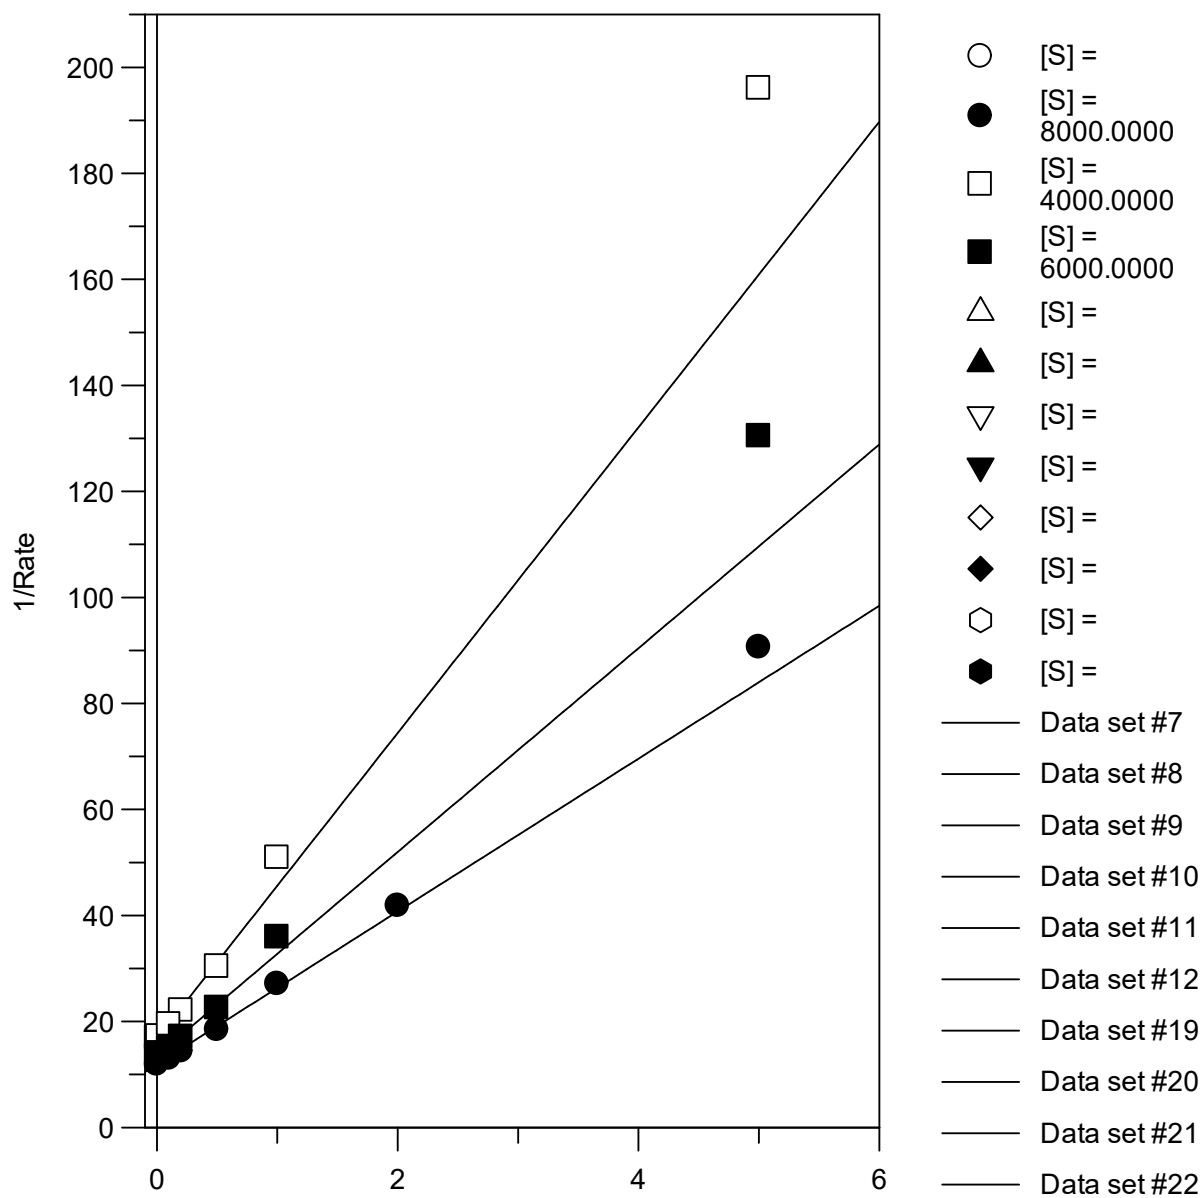

| Parameter | Value     | Std. Error |
|-----------|-----------|------------|
| Vmax      | 0.1415    | 0.0073     |
| Km        | 5496.1706 | 598.3113   |
| Ki        | 0.3368    | 0.0230     |

Figure 47: Dixon plot for **36a**. All concentrations in  $\mu\text{M}$ .

## Dixon Plot Competitive Fit

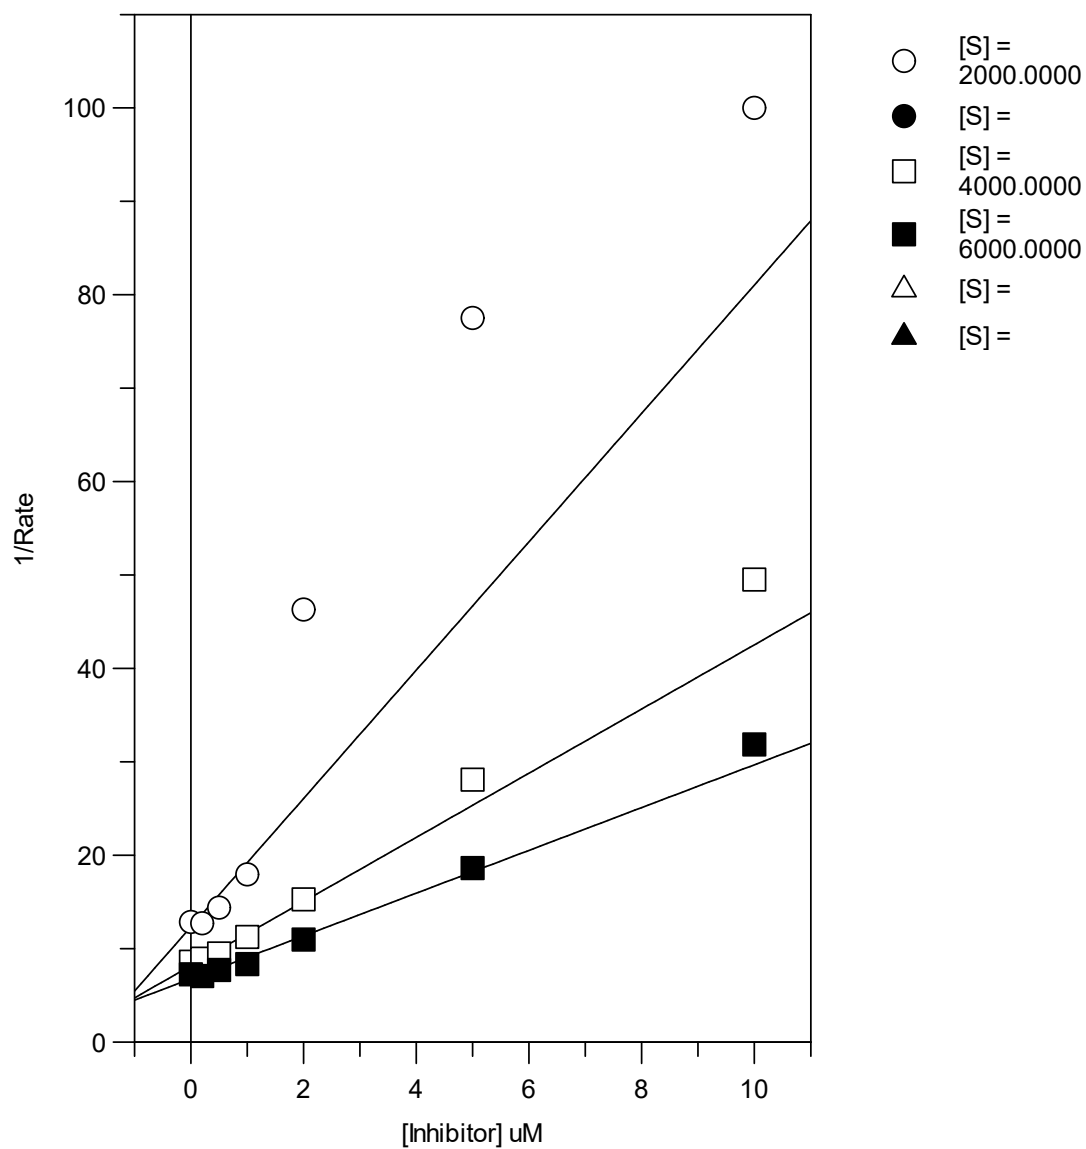

| Parameter | Value     | Std. Error |
|-----------|-----------|------------|
| Vmax      | 0.2503    | 0.0266     |
| Km        | 4166.1719 | 908.1948   |
| Ki        | 1.2109    | 0.1806     |

Figure 48: Dixon Plot for **36b**. All concentrations in uM.

## Dixon Plot Competitive Fit

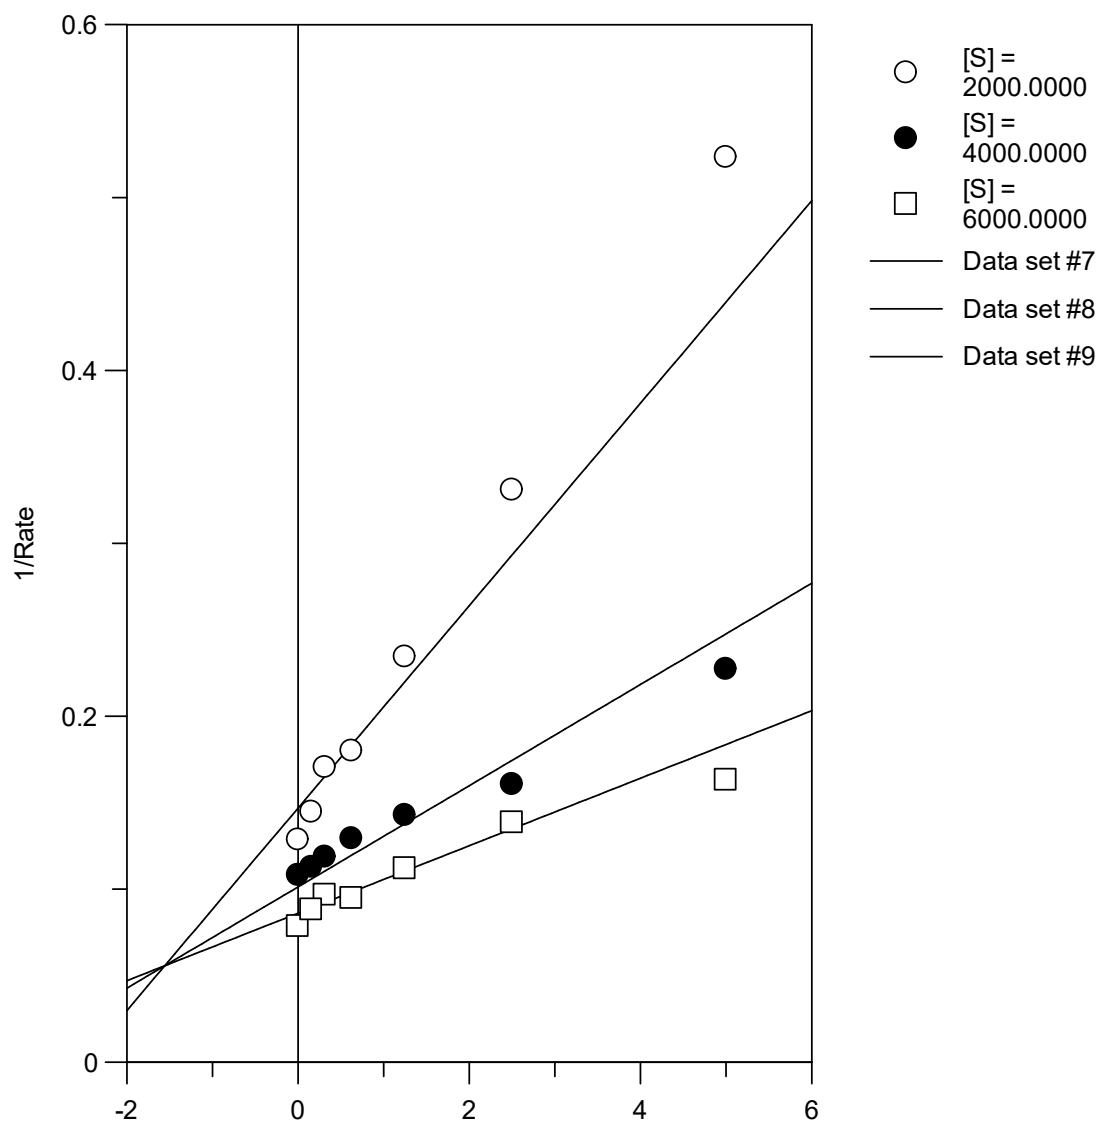

| Parameter | Value     | Std. Error |
|-----------|-----------|------------|
| Vmax      | 17.9529   | 1.5178     |
| Km        | 3274.0189 | 634.0382   |
| Ki        | 1.5575    | 0.2458     |

Figure 49: Dixon plot for **38a**. All concentrations in  $\mu\text{M}$



## Dixon Plot Competitive Fit

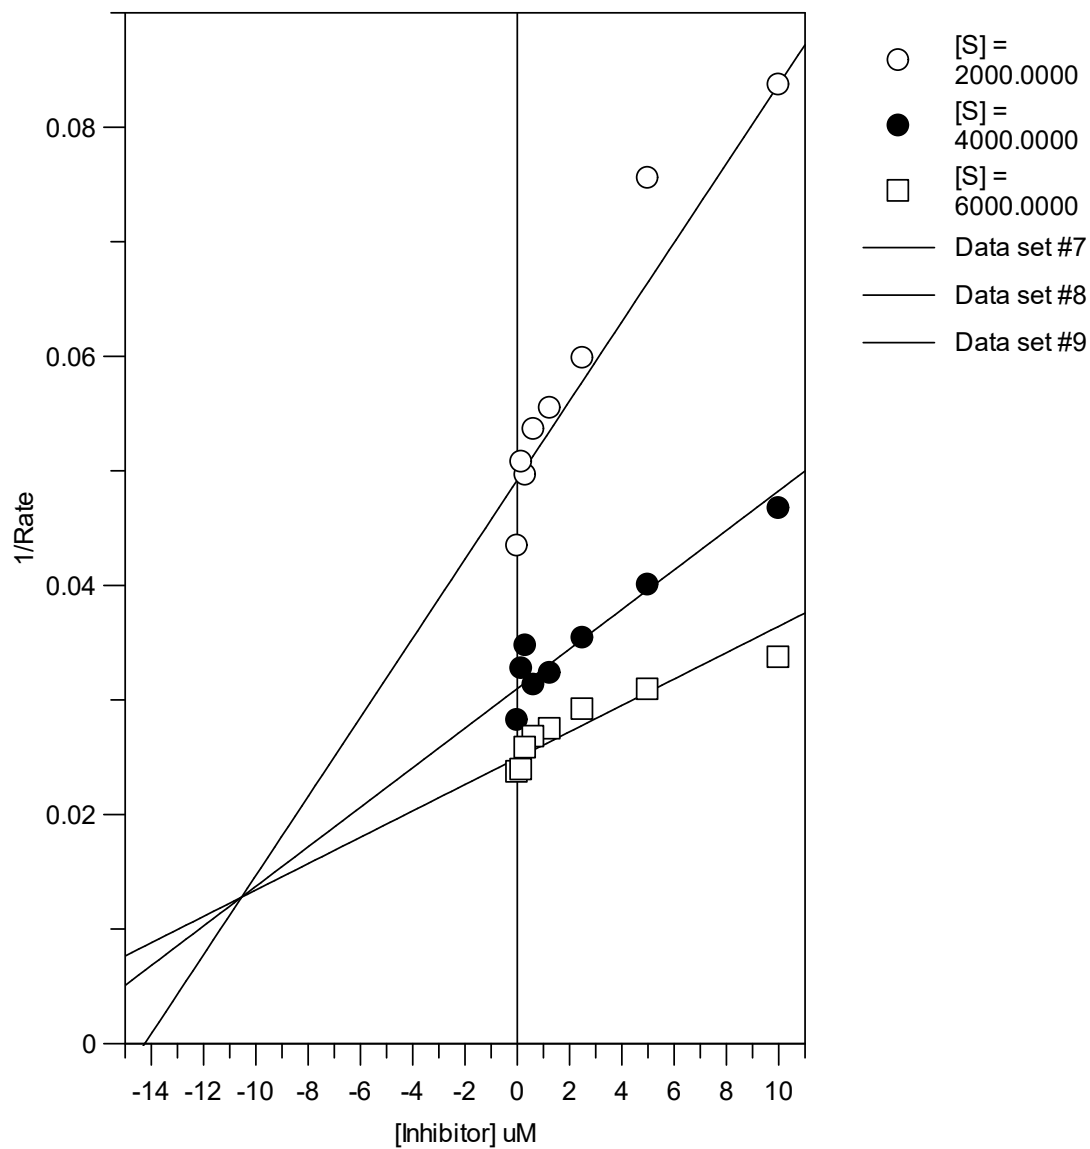

| Parameter | Value     | Std. Error |
|-----------|-----------|------------|
| Vmax      | 78.2885   | 6.3829     |
| Km        | 5703.8952 | 831.2312   |
| Ki        | 10.5456   | 1.4661     |

Figure 50: Dixon plot for 47a All concentrations in uM.

### Dixon Plot Competitive Fit

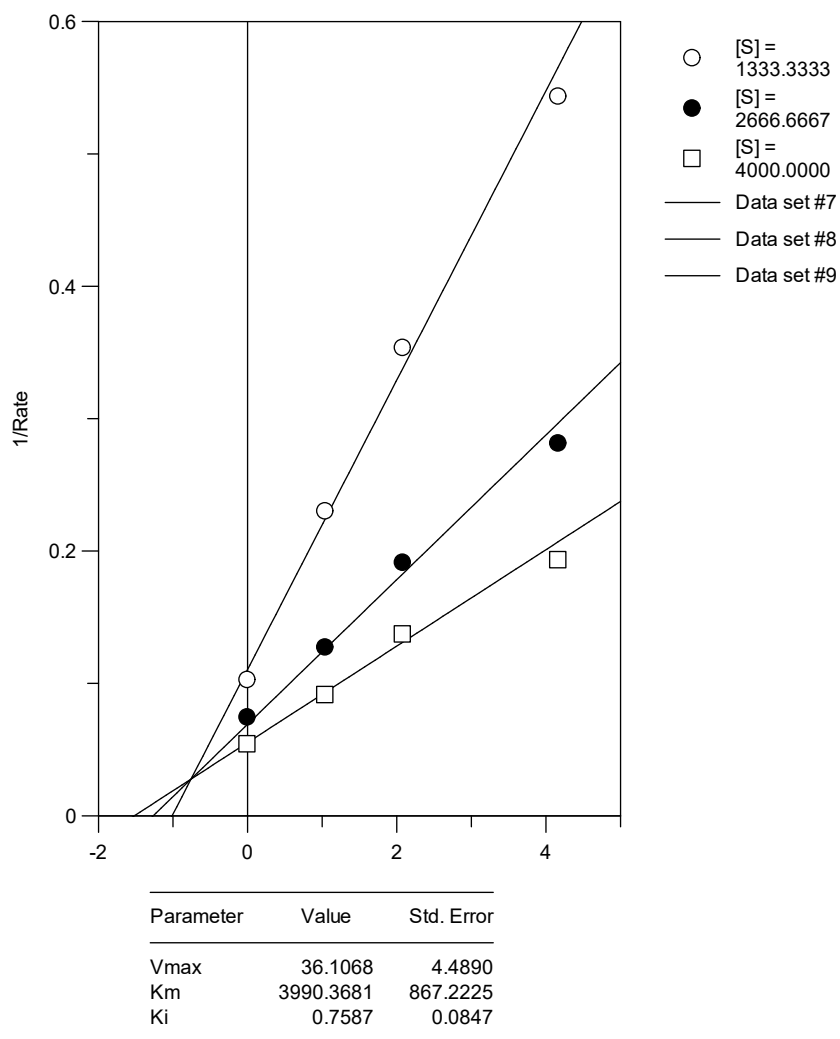

Figure 51: Dixon plot for **48a**. All concentrations in  $\mu\text{M}$ .

## Dixon Plot Competitive Fit

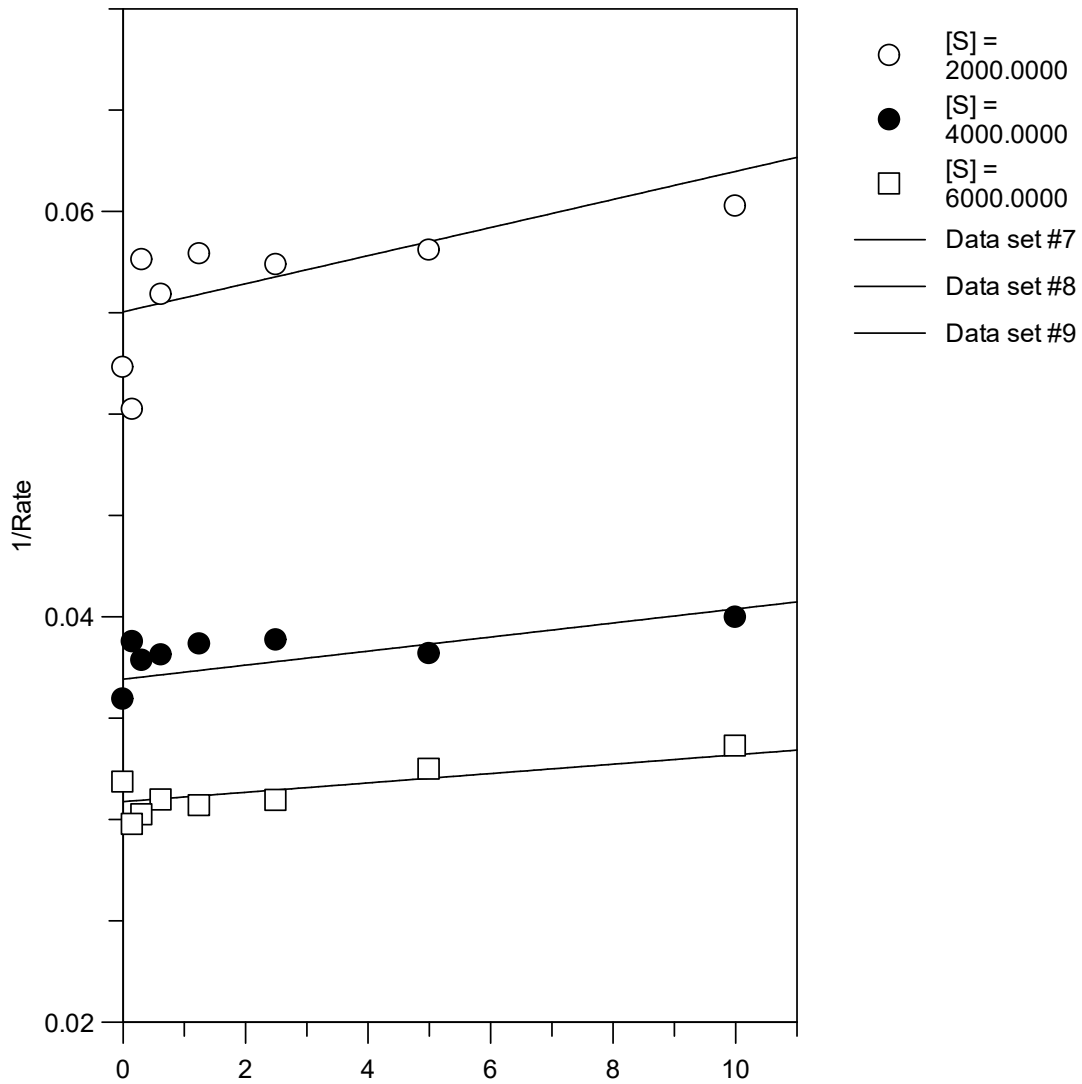

| Parameter | Value     | Std. Error |
|-----------|-----------|------------|
| Vmax      | 53.2159   | 1.7681     |
| Km        | 3858.5909 | 271.3948   |
| Ki        | 52.2972   | 12.2007    |

Figure 52: Dixon plot for **49a**. All concentrations in  $\mu\text{M}$ .

### Dixon Plot Competitive Fit

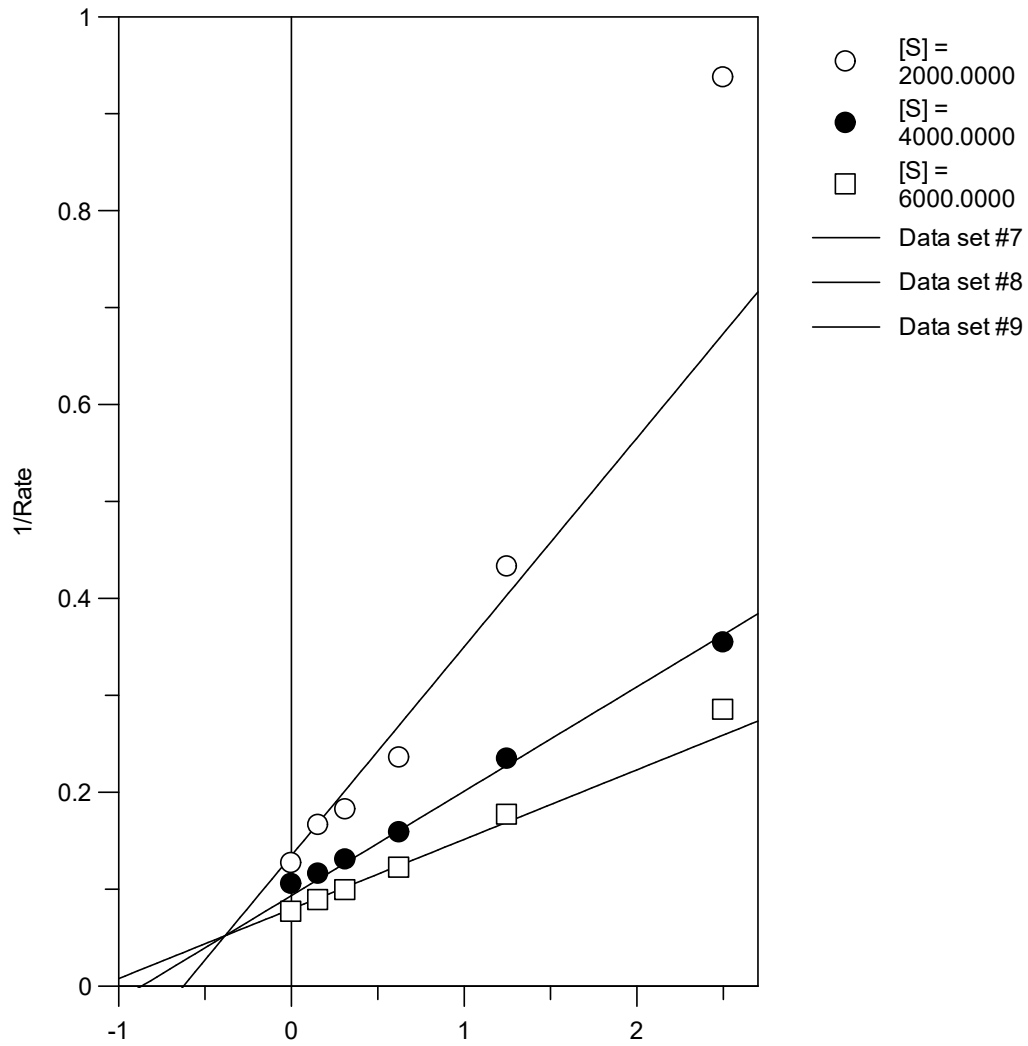

| Parameter | Value     | Std. Error |
|-----------|-----------|------------|
| Vmax      | 19.2595   | 1.6741     |
| Km        | 3185.4885 | 644.8151   |
| Ki        | 0.3839    | 0.0554     |

Figure 53: Dixon plot for *mini MbA*. All concentrations in  $\mu\text{M}$ .

- (1) Smith, R. M.; Weiner, D. P.; Chaturvedi, N. C.; Thimblin, M. D.; Raymond, S. J.; Hansen, D. E. *Bioorganic Chemistry* **1995**, *23*, 397.
- (2) Tysoe, C. R.; Caner, S.; Calvert, M. B.; Win-Mason, A.; Brayer, G. D.; Withers, S. G. *Chem Sci* **2019**, *10*, 11073.
- (3) Villaume, S. A.; Fu, J.; N'Go, I.; Liang, H.; Lou, H.; Kremer, L.; Pan, W.; Vincent, S. *P. Chemistry – A European Journal* **2017**, *23*, 10423.
- (4) Ban, H.; Nagano, M.; Gavriluk, J.; Hakamata, W.; Inokuma, T.; Barbas, C. F. *Bioconjugate Chemistry* **2013**, *24*, 520.
